# Supplementary material for: To Supplement or Not to Supplement: A Metabolic Network Framework for Human Nutritional Supplements
Source: PLoS One. 2013 Aug 5;8(8):e68751. doi: 10.1371/journal.pone.0068751 (PMC3740736; doi:10.1371/journal.pone.0068751)

| Pathways                  | Color | R   | G   | B   | Rank |
|---------------------------|-------|-----|-----|-----|------|
| Objecitve                 |       | 0   | 0   | 0   | 1    |
| Glycolysis                |       | 0   | 255 | 0   | 2    |
| Fatty Acid                |       | 255 | 255 | 0   | 3    |
| Amino Acid Catabolism     |       | 0   | 0   | 255 | 4    |
| Fatty Alcohol             |       | 255 | 150 | 0   | 5    |
| Pentose Phosphate Pathway |       | 0   | 150 | 150 | 6    |
| TCA                       |       | 255 | 0   | 0   | 7    |
| Electron Transport Chain  |       | 200 | 0   | 0   | 8    |
| Amino Acid Biosynthesis   |       | 100 | 200 | 255 | 9    |
| Muscle                    |       | 0   | 100 | 200 | 10   |
| Polymerizatin             |       | 0   | 100 | 200 | 11   |
| Protein Synthesis         |       | 0   | 100 | 200 | 12   |
| Translation               |       | 0   | 100 | 200 | 13   |
| Glycogen Synthesis        |       | 0   | 150 | 100 | 14   |
| TAG                       |       | 200 | 200 | 0   | 15   |
| Amino Acid Mit Transport  |       | 175 | 150 | 200 | 16   |
| Mitochondrial Transport   |       | 100 | 150 | 100 | 17   |
| Cellular Uptake           |       | 150 | 150 | 100 | 18   |
| Cellular Export           |       | 150 | 150 | 100 | 19   |
| Exchange                  |       | 150 | 150 | 100 | 20   |
| Nutrient                  |       | 150 | 150 | 100 | 21   |
| Shuttle Cytosolic         |       | 100 | 50  | 50  | 22   |
| Shuttle Mitochondrial     |       | 100 | 50  | 50  | 23   |
| Creatine                  |       | 150 | 0   | 200 | 24   |
| Vitamin Metabolism        |       | 150 | 0   | 200 | 25   |
| Glutathione biosynthesis  |       | 150 | 0   | 200 | 26   |
| Glutathione Redox         |       | 150 | 0   | 200 | 27   |
| Signaling/Hormone         |       | 150 | 100 | 50  | 28   |

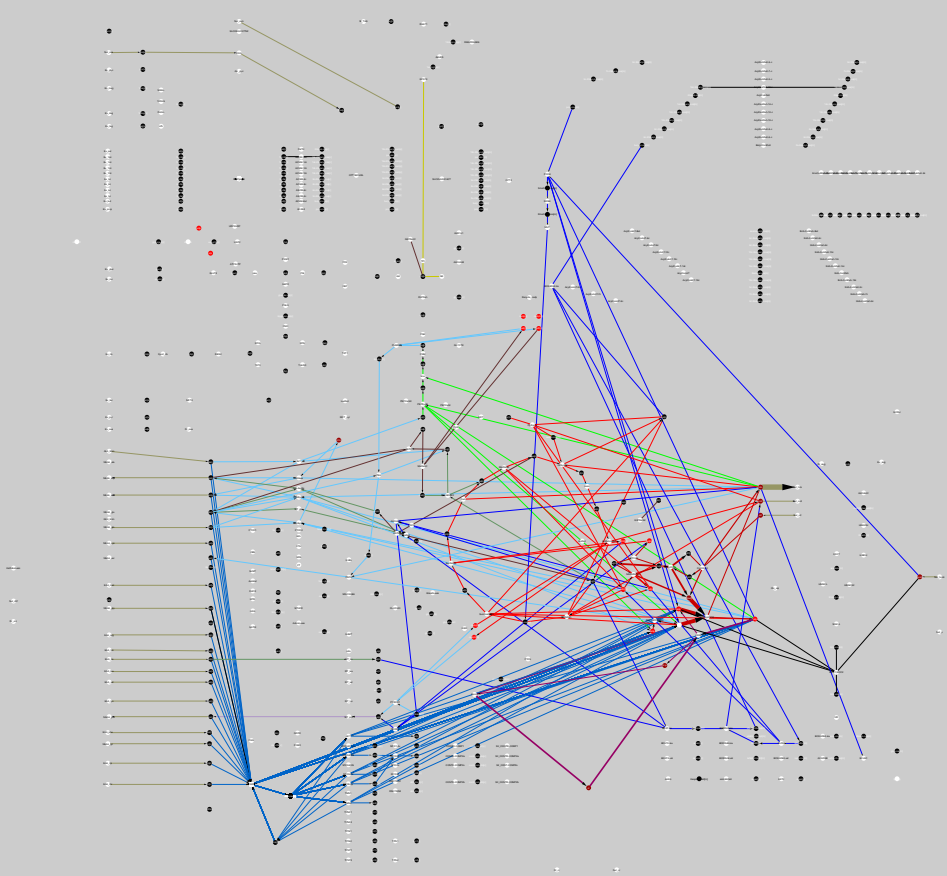

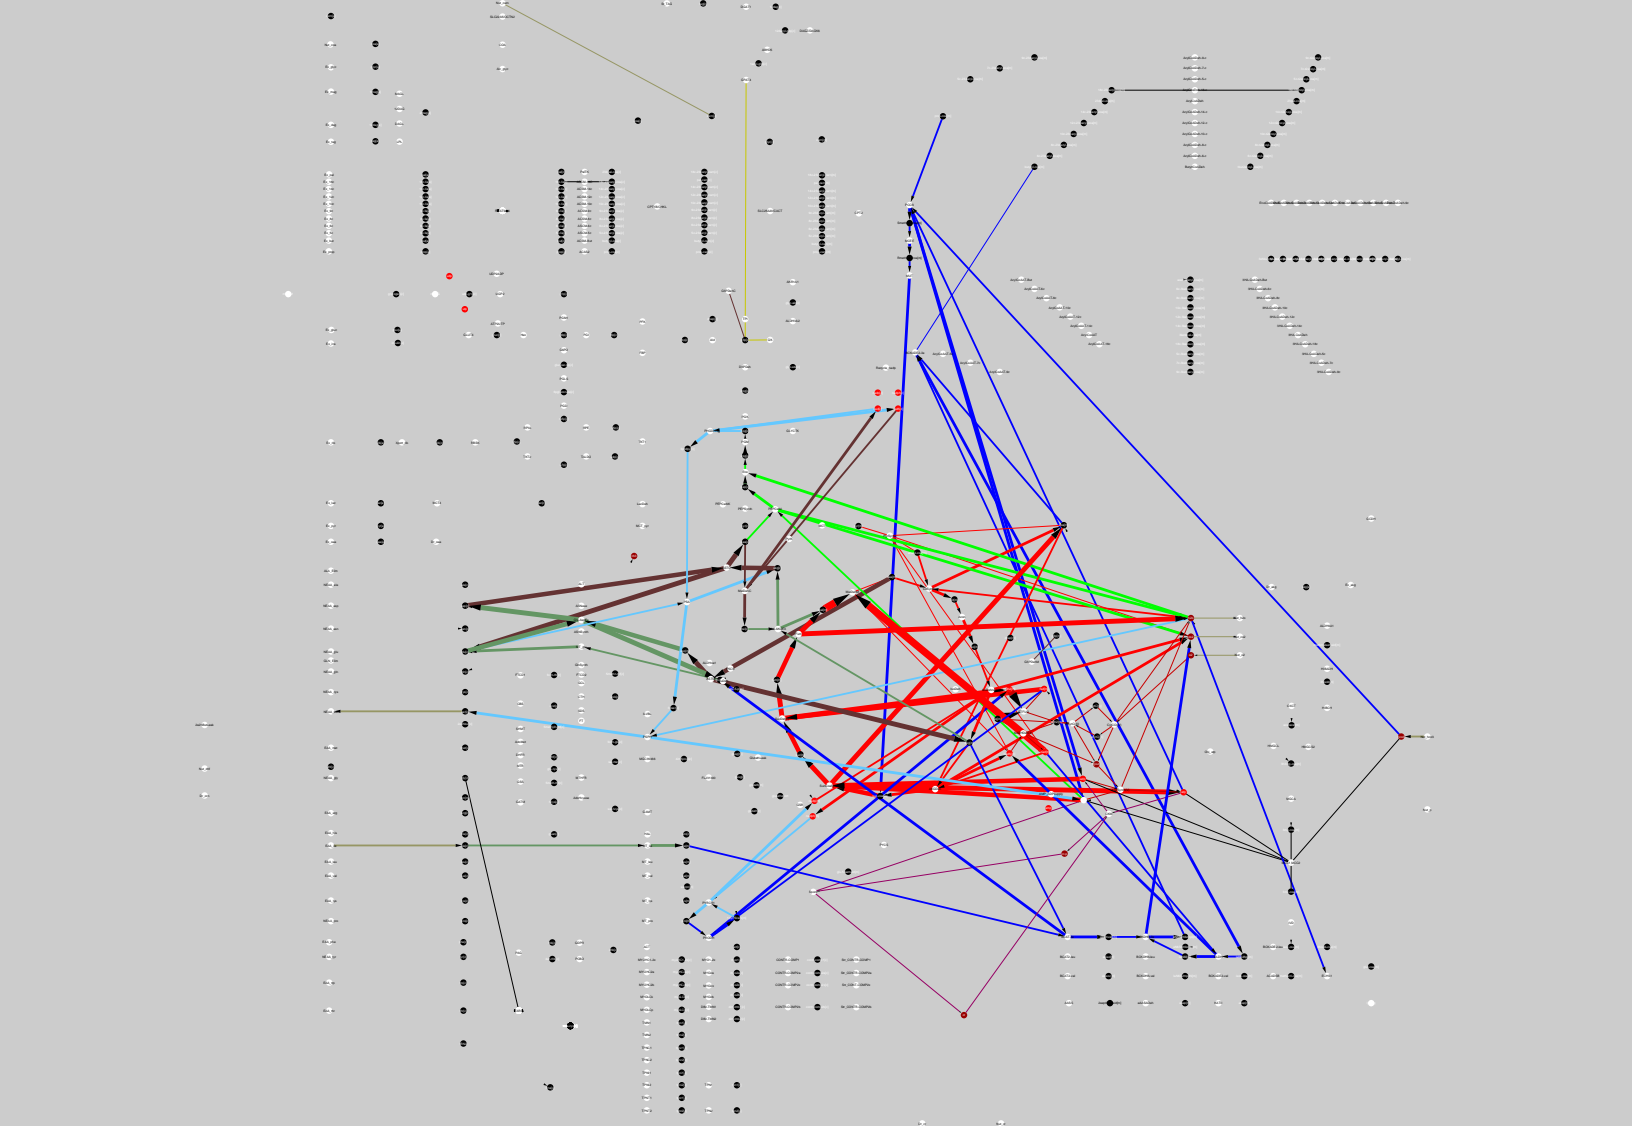

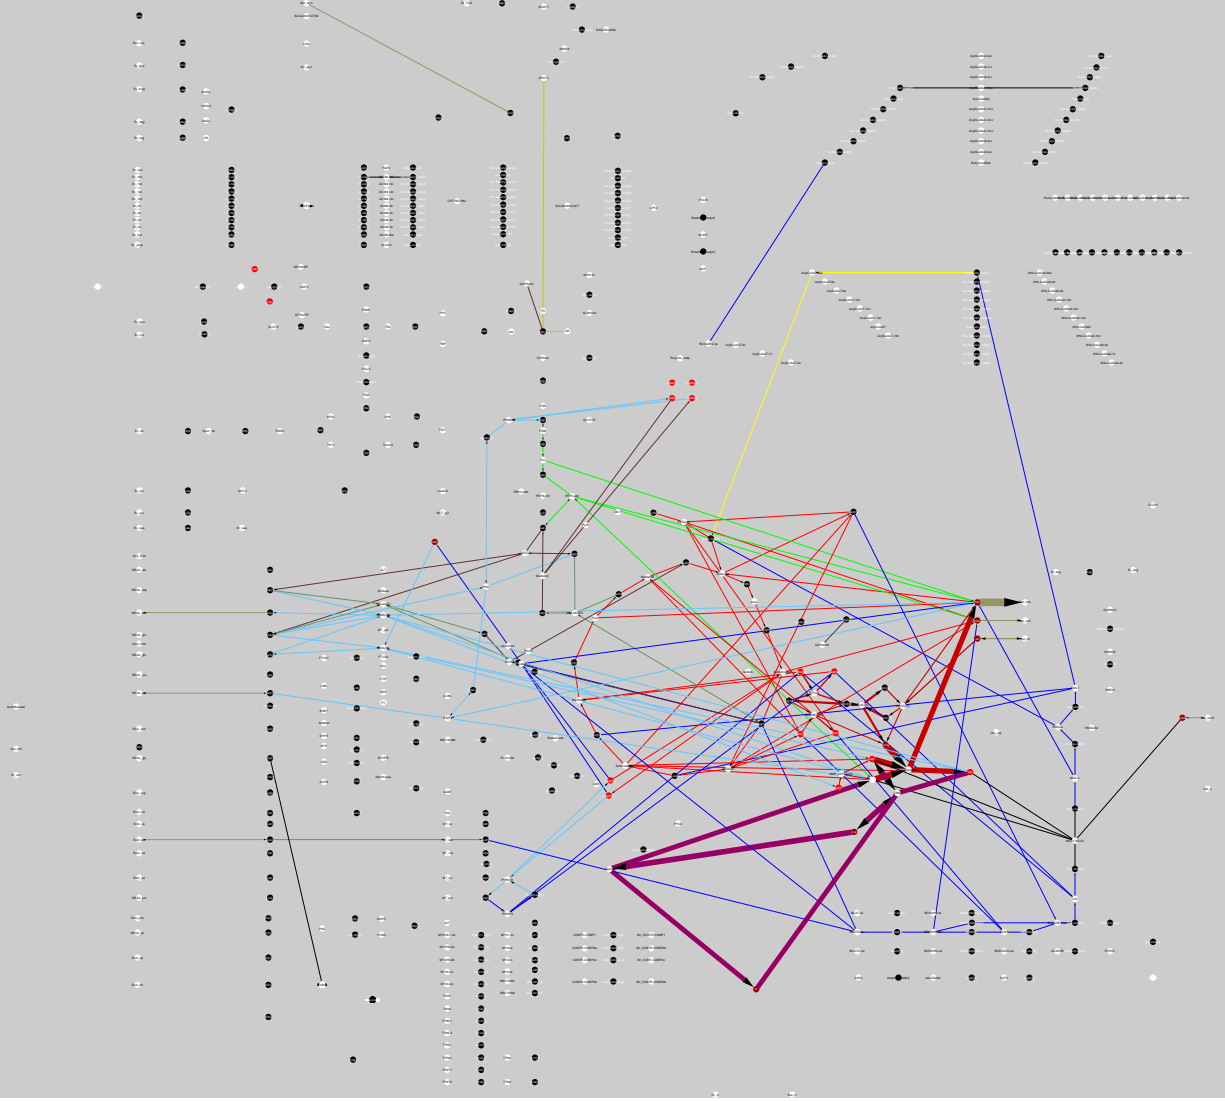

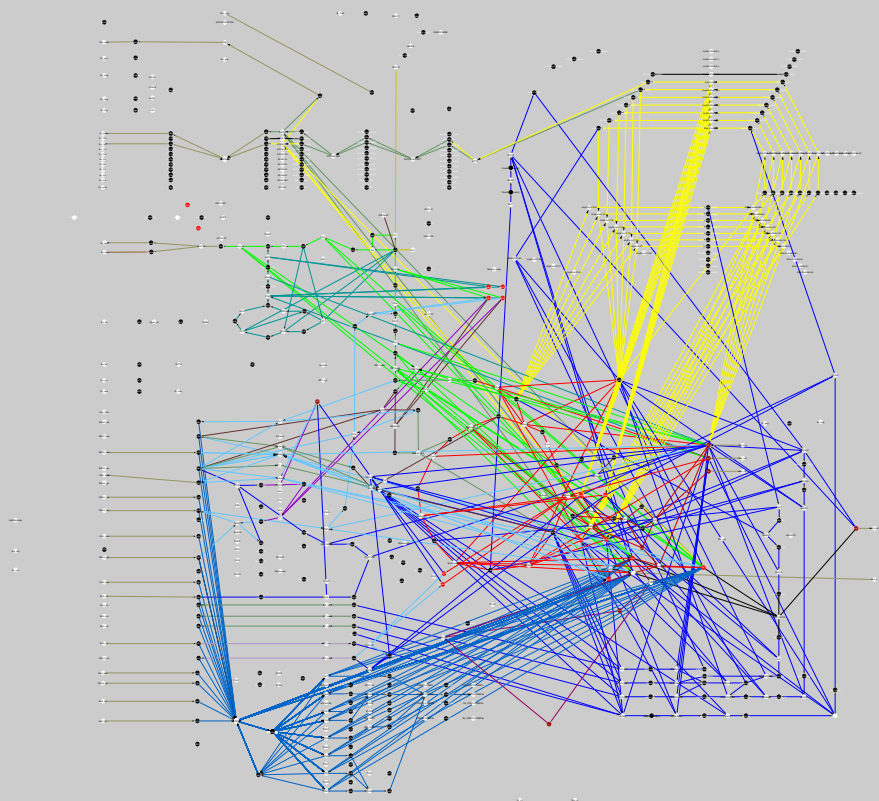

Supplement: Figure S1 — Flux differences compared to control show how increased amino acids could be used. This figure shows the changes in fluxes from the control solution described in methods. (a) Manually assigned color key for pathways in the model. (b) Shows the differences in fluxes between the three amino acid supplementation and control results. (c) Shows the differences in fluxes between isoleucine supplementing and control. (d) Shows the differences in fluxes between leucine supplementing and control. (e) Shows the differences in fluxes between methionine supplementing and control. (PDF) [file pone.0068751.s001.pdf]
