# Supplementary material for: To Supplement or Not to Supplement: A Metabolic Network Framework for Human Nutritional Supplements
Source: PubMed Central journal article supplement (PMC3740736; doi:10.1371/journal.pone.0068751), 2013-08-05
Supplement: pone.0068751.s002.pdf [file pone.0068751.s002.pdf]

|     | control   | arg             | his              | ile              | leu              | lys              | met              | phe              |
|-----|-----------|-----------------|------------------|------------------|------------------|------------------|------------------|------------------|
|     | 2.178E-05 | 2.178E-05       | 2.178E-05        | 2.178E-05        | 2.178E-05        | 2.178E-05        | <b>2.83E-05</b>  | 2.178E-05        |
| arg | -0.08     | <b>-0.04645</b> | -0.04645         | -0.04645         | -0.04645         | -0.04645         | -0.060359        | -0.04645         |
| his | -0.082    | -0.016006       | <b>-0.016006</b> | -0.016006        | -0.016006        | -0.016006        | -0.050845        | -0.016006        |
| ile | -0.062    | -0.062          | -0.062           | <b>-40001.79</b> | -0.062           | -0.062           | -0.062           | -0.062           |
| leu | -0.123    | -0.123          | -0.123           | -0.085126        | <b>-0.300845</b> | -0.123           | -0.123           | -0.123           |
| lys | -0.188    | -0.089983       | -0.178905        | -0.089983        | -0.089983        | <b>-0.089983</b> | -0.162506        | -0.089983        |
| met | -0.025    | -0.025          | -0.025           | -0.025           | -0.025           | -0.025           | <b>-0.032486</b> | -0.025           |
| phe | -0.057    | -0.029682       | -0.029682        | -0.029682        | -0.029682        | -0.029682        | -0.03857         | <b>-0.029682</b> |
| thr | -0.14     | -0.047343       | -0.047343        | -0.047343        | -0.047343        | -0.047343        | -0.061519        | -0.047343        |
| trp | -0.044    | -0.004943       | -0.004943        | -0.004943        | -0.004943        | -0.004943        | -0.006424        | -0.004943        |
| val | -0.233    | -0.233          | -0.233           | -0.233           | -0.233           | -0.233           | -0.233           | -0.233           |
| ala | -0.333    | -0.333          | -0.333           | -0.333           | -0.333           | -0.333           | -0.333           | -0.333           |
| asn | -0.041    | 0.5371577       | 0.7150026        | -0.041           | 0.7150026        | 0.5371577        | -0.041           | 0.5371577        |
| asp | -0.003    | -0.003          | -0.003           | -0.003           | -0.003           | -0.003           | -0.003           | -0.003           |
| cys | -0.052    | -0.010279       | -0.010279        | -0.010279        | -0.010279        | -0.010279        | -0.013356        | -0.010279        |
| glu | -0.024    | -0.024          | -0.024           | -0.024           | -0.024           | -0.024           | -0.024           | -0.024           |
| gln | -0.586    | -0.586          | -0.586           | -0.586           | -0.586           | -0.586           | -0.586           | -0.586           |
| gly | -0.23     | -0.047147       | -0.047147        | -0.047147        | -0.047147        | -0.047147        | -0.091311        | -0.047147        |
| pro | -0.168    | -0.168          | -0.168           | -0.168           | -0.168           | -0.168           | -0.168           | -0.168           |
| ser | -0.114    | 0.3848432       | 0.2069983        | 40002.148        | 0.2069983        | 0.3848432        | 0.1993168        | 0.3848432        |
| tyr | -0.059    | -0.017378       | -0.017378        | -0.017378        | -0.017378        | -0.017378        | -0.022581        | -0.017378        |

| thr              | trp              | val             | ala              | asn              | asp            | cys              | glu              | gln              |
|------------------|------------------|-----------------|------------------|------------------|----------------|------------------|------------------|------------------|
| 2.178E-05        | 2.178E-05        | 2.178E-05       | 2.178E-05        | 2.178E-05        | 2.178E-05      | 2.178E-05        | 2.178E-05        | 2.178E-05        |
| -0.04645         | -0.04645         | -0.04645        | -0.04645         | -0.04645         | -0.04645       | -0.04645         | -0.04645         | -0.04645         |
| -0.016006        | -0.016006        | -0.016006       | -0.016006        | -0.016006        | -0.082         | -0.016006        | -0.016006        | -0.016006        |
| -0.062           | -0.062           | -0.062          | -0.062           | -0.062           | -0.062         | -0.062           | -0.062           | -0.062           |
| -0.123           | -0.123           | -0.085126       | -0.085126        | -0.123           | -0.123         | -0.123           | -0.085126        | -0.085126        |
| -0.089983        | -0.089983        | -0.089983       | -0.089983        | -0.178905        | -0.188         | -0.089983        | -0.089983        | -0.089983        |
| -0.025           | -0.025           | -0.025          | -0.025           | -0.025           | -0.025         | -0.025           | -0.025           | -0.025           |
| -0.029682        | -0.029682        | -0.029682       | -0.057           | -0.029682        | -0.057         | -0.029682        | -0.057           | -0.029682        |
| <b>-0.047343</b> | -0.047343        | -0.047343       | -0.047343        | -0.047343        | -0.047343      | -0.047343        | -0.047343        | -0.047343        |
| -0.004943        | <b>-0.004943</b> | -0.004943       | -0.004943        | -0.004943        | -0.004943      | -0.004943        | -0.004943        | -0.004943        |
| -0.233           | -0.233           | <b>-52629.9</b> | -0.086286        | -0.233           | -0.042204      | -0.233           | -0.042204        | -0.233           |
| -0.333           | -0.333           | -0.333          | <b>-333332.6</b> | -0.333           | -0.333         | -0.333           | -0.333           | -0.333           |
| 0.5371577        | 0.5371577        | -0.034669       | -0.034669        | <b>0.7150026</b> | 62497.926      | 0.5371577        | -0.041           | 124974.56        |
| -0.003           | -0.003           | -0.003          | -0.003           | -0.003           | <b>-124994</b> | -0.003           | 124999.73        | -0.003           |
| -0.010279        | -0.010279        | -0.010279       | -0.010279        | -0.010279        | -0.010279      | <b>-0.010279</b> | -0.010279        | -0.010279        |
| -0.024           | -0.024           | -0.024          | -0.024           | -0.024           | -0.024         | -0.024           | <b>-125000.5</b> | -0.024           |
| -0.586           | -0.586           | -0.586          | -0.586           | -0.586           | -0.586         | -0.586           | -0.586           | <b>-124974.7</b> |
| -0.047147        | -0.047147        | -0.047147       | -0.047147        | -0.047147        | -0.113141      | -0.047147        | -0.047147        | -0.047147        |
| -0.168           | -0.168           | -0.168          | -0.168           | -0.168           | -0.168         | -0.168           | -0.028484        | -0.168           |
| 0.3848432        | 0.3848432        | 52630.089       | 333332.45        | 0.2069983        | -0.114         | 0.3848432        | -0.114           | 0.4227169        |
| -0.017378        | -0.017378        | -0.017378       | 0.0099399        | -0.017378        | 0.0099399      | -0.017378        | 0.0099399        | -0.017378        |

| gly              | pro              | ser              | tyr              |
|------------------|------------------|------------------|------------------|
| 2.178E-05        | 2.178E-05        | 2.178E-05        | 2.178E-05        |
| -0.04645         | -0.04645         | -0.04645         | -0.04645         |
| -0.016006        | -0.016006        | -0.016006        | -0.016006        |
| -0.062           | -0.062           | -0.062           | -0.062           |
| -0.123           | -0.085126        | -0.123           | -0.123           |
| -0.089983        | -0.089983        | -0.089983        | -0.089983        |
| -0.025           | -0.025           | -0.025           | -0.025           |
| -0.029682        | -0.029682        | -0.029682        | -0.029682        |
| -0.047343        | -0.047343        | -0.047343        | -0.047343        |
| -0.004943        | -0.004943        | -0.004943        | -0.004943        |
| -0.233           | -0.042204        | -0.233           | -0.233           |
| -0.333           | -0.333           | -0.333           | -0.333           |
| 0.5371577        | -0.034669        | 0.5371577        | 0.5371577        |
| -0.003           | -0.003           | -0.003           | -0.003           |
| -0.010279        | -0.010279        | -0.010279        | -0.010279        |
| -0.024           | 199999.3         | -0.024           | -0.024           |
| -0.586           | -0.586           | -0.586           | -0.586           |
| <b>-0.047147</b> | -0.047147        | -0.047147        | -0.047147        |
| -0.168           | <b>-199999.7</b> | -0.168           | -0.168           |
| 0.3848432        | -0.046124        | <b>0.3848432</b> | 0.3848432        |
| -0.017378        | -0.017378        | -0.017378        | <b>-0.017378</b> |

Flux

**Prot Synth**

|          |                                     |
|----------|-------------------------------------|
| Obj_atp  | atp --> adp + p                     |
| Ex_ins   | insulin[e] <==>                     |
| Ex_gluc  | gluc[e] <==>                        |
| Ex_lac   | lac[e] <==>                         |
| Ex_pyr   | pyr[e] <==>                         |
| Ex_pal   | pal[e] <==>                         |
| Ex_prop  | prop[e] <==>                        |
| Ex_but   | but[e] <==>                         |
| Ex_5c    | 5c-fa[e] <==>                       |
| Ex_6c    | 6c-fa[e] <==>                       |
| Ex_8c    | 8c-fa[e] <==>                       |
| Ex_9c    | 9c-fa[e] <==>                       |
| Ex_10c   | 10c-fa[e] <==>                      |
| Ex_12c   | 12c-fa[e] <==>                      |
| Ex_14c   | 14c-fa[e] <==>                      |
| Ex_18c   | 18c-fa[e] <==>                      |
| Ex_glyc  | glyc[e] <==>                        |
| Ex_tag   | tag[e] <==>                         |
| Ex_dag   | 12dag[e] <==>                       |
| Ex_mag   | 1mag[e] <==>                        |
| Ex_akg   | akg[e] -->                          |
| Ex_oaa   | oaa[e] -->                          |
| Ex_rib   | rib[e] <==>                         |
| Nut_o2   | o2 <==>                             |
| Nut_co2  | co2 <==>                            |
| Nut_h2o  | h2o <==>                            |
| Nut_p    | p <==>                              |
| Nut_hco3 | hco3 <==>                           |
| Nut_coa  | coa[e] <==>                         |
| Nut_carn | carn[e] <==>                        |
| Nut_dhf  | dhf[c] <==>                         |
| LPL      | tag[e] + h2o --> pal[e] + 12dag[e]  |
| DAGL     | 12dag[e] + h2o --> 2mag[e] + pal[e] |
| 12DAG    | 2mag[e] <==> 1mag[e]                |
| MAGL     | 1mag[e] + h2o --> glyc[e] + pal[e]  |
| GLUT4    | insulin[e] + gluc[e] --> gluc[c]    |
| MCT4     | lac[e] <==> lac[c]                  |
| MCT_pyr  | pyr[e] --> pyr[c]                   |
| FAT/CD36 | pal[e] --> pal[c]                   |
| FATprop  | prop[e] <==> prop[c]                |
| FATbut   | but[e] <==> but[c]                  |
| FAT5c    | 5c-fa[e] <==> 5c-fa[c]              |
| FAT6c    | 6c-fa[e] <==> 6c-fa[c]              |
| FAT8c    | 8c-fa[e] <==> 8c-fa[c]              |
| FAT9c    | 9c-fa[e] <==> 9c-fa[c]              |

|               |                                                            |
|---------------|------------------------------------------------------------|
| FAT10c        | 10c-fa[e] <==> 10c-fa[c]                                   |
| FAT12c        | 12c-fa[e] <==> 12c-fa[c]                                   |
| FAT14c        | 14c-fa[e] <==> 14c-fa[c]                                   |
| FAT18c        | 18c-fa[e] <==> 18c-fa[c]                                   |
| Alc_glyc      | glyc[e] <==> glyc[c]                                       |
| COA           | coa[e] --> coa[c]                                          |
| SLC22A5/OCTN2 | carn[e] <==> carn[c]                                       |
| Xport_rib     | rib[e] --> rib[c]                                          |
| Dr_akg        | akg[c] --> akg[e]                                          |
| Dr_oaa        | oaa[c] --> oaa[e]                                          |
| Hex           | atp + gluc[c] --> adp + p + g6p[c]                         |
| PGI           | g6p[c] <==> f6p[c]                                         |
| PFK           | atp + f6p[c] --> adp + fbp[c]                              |
| FBP           | fbp[c] + h2o --> f6p[c] + p                                |
| Ald           | fbp[c] <==> dhap[c] + g3p[c]                               |
| TPI           | g3p[c] <==> dhap[c]                                        |
| D3PDeh        | g3p[c] + nad[c] <==> dpg[c] + nadh[c]                      |
| PGK           | dpg[c] + adp <==> 3pg[c] + atp                             |
| PGM           | 3pg[c] <==> 2pg[c]                                         |
| Eno           | 2pg[c] <==> pep[c] + h2o                                   |
| PyrK          | pep[c] + adp --> pyr[c] + atp                              |
| PEPSynth      | pyr[c] + atp + h2o --> pep[c] + amp + p                    |
| PEPCarbK      | oaa[c] + atp --> co2 + pep[c] + adp                        |
| PEPCarbl      | oaa[c] + p --> pep[c] + h2o + co2                          |
| LacDeh        | lac[c] + nad[c] <==> pyr[c] + nadh[c]                      |
| MalDehC(mdh1) | oaa[c] + nadh[c] <==> mal[c] + nad[c]                      |
| ASTC          | asp[c] + akg[c] <==> glu[c] + oaa[c]                       |
| G3PDehC       | dhap[c] + nadh[c] <==> glyc3p[c] + nad[c]                  |
| Mal-AGGEX     | mal[c] + akg[m] <==> mal[m] + akg[c]                       |
| Glu-AspEx     | asp[m] + glu[c] <==> asp[c] + glu[m]                       |
| MCT           | pyr[c] --> pyr[m]                                          |
| ASTM          | glu[m] + oaa[m] <==> asp[m] + akg[m]                       |
| G3PDehM       | glyc3p[m] + fad[m] <==> dhap[m] + fadh2[m]                 |
| PyrSynth/PDH  | pyr[m] + coa[m] + nad[m] --> acetyl-coa[m] + nadh[m] + co2 |
| CitSynth      | oaa[m] + acetyl-coa[m] + h2o <==> cit[m] + coa[m]          |
| Acon          | cit[m] <==> iso[m]                                         |
| IsoDeh        | iso[m] + nad[m] --> akg[m] + co2 + nadh[m]                 |
| IsoDehnadph   | iso[m] + nadp[m] --> akg[m] + co2 + nadph[m]               |
| AKGDeh        | akg[m] + coa[m] + nad[m] --> suc-coa[m] + co2 + nadh[m]    |
| SunCoaSynth   | suc-coa[m] + adp + p <==> suc[m] + coa[m] + atp            |
| SucDeh(I)     | suc[m] + fad[m] <==> fum[m] + fadh2[m]                     |
| Fum           | fum[m] <==> mal[m] + h2o                                   |
| MalDehM       | mal[m] + nad[m] <==> oaa[m] + nadh[m]                      |
| NADHDeh(II)   | nadh[m] + uq[m] --> nad[m] + uqh2[m] + 4 h[out]            |
| ETFUO         | fadh2[m] + uq[m] --> fad[m] + uqh2[m]                      |
| UCytC(III)    | 2 ocytC[m] + uqh2[m] --> 2 rcytC[m] + uq[m] + 4 h[out]     |
| CytCO(IV)     | o2 + 4 rcytC[m] --> 2 h2o + 4 ocytC[m] + 8 h[out]          |

|                 |                                                                                                                            |
|-----------------|----------------------------------------------------------------------------------------------------------------------------|
| ATPSynth(V)     | $\text{adp} + \text{p} + 4 \text{ h[out]} \rightleftharpoons \text{atp} + \text{h}_2\text{o}$                              |
| AMP_ADPSupply   | $\text{amp} + \text{p} \rightleftharpoons \text{adp}$                                                                      |
| PalTK           | $\text{pal[c]} + \text{coa[c]} + \text{atp} \rightarrow 234\text{pal-coa[c]} + 2 \text{ p} + \text{amp}$                   |
| CPT1B/CHKL      | $\text{carn[c]} + 234\text{pal-coa[c]} \rightleftharpoons \text{pal-carn[c]} + \text{coa[c]}$                              |
| SLC25A20/CACT   | $\text{pal-carn[c]} + \text{carn[m]} \rightarrow \text{carn[c]} + \text{pal-carn[m]}$                                      |
| CPT2            | $\text{pal-carn[m]} + \text{coa[m]} \rightarrow 234\text{pal-coa[m]} + \text{carn[m]}$                                     |
| CRAT(mit)       | $\text{acetyl-carn[m]} + \text{coa[m]} \rightleftharpoons \text{carn[m]} + \text{acetyl-coa[m]}$                           |
| CRAT Transport  | $\text{acetyl-carn[c]} + \text{carn[m]} \rightleftharpoons \text{carn[c]} + \text{acetyl-carn[m]}$                         |
| CRAT(cyt)       | $\text{carn[c]} + \text{acetyl-coa[c]} \rightleftharpoons \text{acetyl-carn[c]} + \text{coa[c]}$                           |
| Acetyl-coaLeak  | $\text{acetyl-coa[c]} \rightarrow$                                                                                         |
| AcylCoADeh      | $234\text{pal-coa[m]} + \text{fad[m]} \rightarrow \text{fadh}_2\text{[m]} + 23\text{pal-coa[m]}$                           |
| EnoCoADeh       | $23\text{pal-coa[m]} + \text{h}_2\text{o} \rightleftharpoons 3\text{ohpal-coa[m]}$                                         |
| 3HA-CoADeh      | $3\text{ohpal-coa[m]} + \text{nad[m]} \rightleftharpoons 3\text{ketopal-coa[m]} + \text{nadh[m]}$                          |
| AcylCoAAT       | $3\text{ketopal-coa[m]} + \text{coa[m]} \rightarrow 14\text{c-}234\text{acyl-coa[m]} + \text{acetyl-coa[m]}$               |
| AcylCoADeh-18-c | $18\text{c-}234\text{acyl-coa[m]} + \text{fad[m]} \rightarrow 18\text{c-t}_2\text{enoyl-coa[m]} + \text{fadh}_2\text{[m]}$ |
| EnoCoADeh-18c   | $18\text{c-t}_2\text{enoyl-coa[m]} + \text{h}_2\text{o} \rightleftharpoons 18\text{c-}3\text{ohacyl-coa[m]}$               |
| 3HA-CoADeh-18c  | $18\text{c-}3\text{ohacyl-coa[m]} + \text{nad[m]} \rightleftharpoons 18\text{c-}3\text{ketoacyl-coa[m]} + \text{nadh[m]}$  |
| AcylCoAAT-18c   | $18\text{c-}3\text{ketoacyl-coa[m]} + \text{coa[m]} \rightarrow 234\text{pal-coa[m]} + \text{acetyl-coa[m]}$               |
| AcylCoADeh-14-c | $14\text{c-}234\text{acyl-coa[m]} + \text{fad[m]} \rightarrow 14\text{c-t}_2\text{enoyl-coa[m]} + \text{fadh}_2\text{[m]}$ |
| EnoCoADeh-14c   | $14\text{c-t}_2\text{enoyl-coa[m]} + \text{h}_2\text{o} \rightleftharpoons 14\text{c-}3\text{ohacyl-coa[m]}$               |
| 3HA-CoADeh-14c  | $14\text{c-}3\text{ohacyl-coa[m]} + \text{nad[m]} \rightleftharpoons 14\text{c-}3\text{ketoacyl-coa[m]} + \text{nadh[m]}$  |
| AcylCoAAT-14c   | $14\text{c-}3\text{ketoacyl-coa[m]} + \text{coa[m]} \rightarrow 12\text{c-}234\text{acyl-coa[m]} + \text{acetyl-coa[m]}$   |
| AcylCoADeh-12-c | $12\text{c-}234\text{acyl-coa[m]} + \text{fad[m]} \rightarrow 12\text{c-t}_2\text{enoyl-coa[m]} + \text{fadh}_2\text{[m]}$ |
| EnoCoADeh-12c   | $12\text{c-t}_2\text{enoyl-coa[m]} + \text{h}_2\text{o} \rightleftharpoons 12\text{c-}3\text{ohacyl-coa[m]}$               |
| 3HA-CoADeh-12c  | $12\text{c-}3\text{ohacyl-coa[m]} + \text{nad[m]} \rightleftharpoons 12\text{c-}3\text{ketoacyl-coa[m]} + \text{nadh[m]}$  |
| AcylCoAAT-12c   | $12\text{c-}3\text{ketoacyl-coa[m]} + \text{coa[m]} \rightarrow 10\text{c-}234\text{acyl-coa[m]} + \text{acetyl-coa[m]}$   |
| AcylCoADeh-10-c | $10\text{c-}234\text{acyl-coa[m]} + \text{fad[m]} \rightarrow 10\text{c-t}_2\text{enoyl-coa[m]} + \text{fadh}_2\text{[m]}$ |
| EnoCoADeh-10c   | $10\text{c-t}_2\text{enoyl-coa[m]} + \text{h}_2\text{o} \rightleftharpoons 10\text{c-}3\text{ohacyl-coa[m]}$               |
| 3HA-CoADeh-10c  | $10\text{c-}3\text{ohacyl-coa[m]} + \text{nad[m]} \rightleftharpoons 10\text{c-}3\text{ketoacyl-coa[m]} + \text{nadh[m]}$  |
| AcylCoAAT-10c   | $10\text{c-}3\text{ketoacyl-coa[m]} + \text{coa[m]} \rightarrow 8\text{c-}234\text{acyl-coa[m]} + \text{acetyl-coa[m]}$    |
| AcylCoADeh-8-c  | $8\text{c-}234\text{acyl-coa[m]} + \text{fad[m]} \rightarrow 8\text{c-t}_2\text{enoyl-coa[m]} + \text{fadh}_2\text{[m]}$   |
| EnoCoADeh-8c    | $8\text{c-t}_2\text{enoyl-coa[m]} + \text{h}_2\text{o} \rightleftharpoons 8\text{c-}3\text{ohacyl-coa[m]}$                 |
| 3HA-CoADeh-8c   | $8\text{c-}3\text{ohacyl-coa[m]} + \text{nad[m]} \rightleftharpoons 8\text{c-}3\text{ketoacyl-coa[m]} + \text{nadh[m]}$    |
| AcylCoAAT-8c    | $8\text{c-}3\text{ketoacyl-coa[m]} + \text{coa[m]} \rightarrow 6\text{c-}234\text{acyl-coa[m]} + \text{acetyl-coa[m]}$     |
| AcylCoADeh-6-c  | $6\text{c-}234\text{acyl-coa[m]} + \text{fad[m]} \rightarrow 6\text{c-t}_2\text{enoyl-coa[m]} + \text{fadh}_2\text{[m]}$   |
| EnoCoADeh-6c    | $6\text{c-t}_2\text{enoyl-coa[m]} + \text{h}_2\text{o} \rightleftharpoons 6\text{c-}3\text{ohacyl-coa[m]}$                 |
| 3HA-CoADeh-6c   | $6\text{c-}3\text{ohacyl-coa[m]} + \text{nad[m]} \rightleftharpoons 6\text{c-}3\text{ketoacyl-coa[m]} + \text{nadh[m]}$    |
| AcylCoAAT-6c    | $6\text{c-}3\text{ketoacyl-coa[m]} + \text{coa[m]} \rightarrow \text{butyryl-coa[m]} + \text{acetyl-coa[m]}$               |
| ButyrylCoADeh   | $\text{butyryl-coa[m]} + \text{fad[m]} \rightarrow \text{tbut}_2\text{enoyl-coa[m]} + \text{fadh}_2\text{[m]}$             |
| EnoCoADeh-But   | $\text{tbut}_2\text{enoyl-coa[m]} + \text{h}_2\text{o} \rightleftharpoons 3\text{ohbutyryl-coa[m]}$                        |
| 3HA-CoADeh-But  | $3\text{ohbutyryl-coa[m]} + \text{coa[m]} \rightleftharpoons \text{acetoacetyl-coa[m]}$                                    |
| AcylCoAAT-But   | $\text{acetoacetyl-coa[m]} \rightarrow 2 \text{ acetyl-coa[m]}$                                                            |
| GK              | $\text{glyc[c]} + \text{atp} \rightleftharpoons \text{glyc}_3\text{p[c]} + \text{adp}$                                     |
| GPAT4           | $\text{glyc}_3\text{p[c]} + 234\text{pal-coa[c]} \rightleftharpoons 1\text{acyl-g}_3\text{p[c]} + \text{coa[c]}$           |
| ABHD5           | $1\text{acyl-g}_3\text{p[c]} + 234\text{pal-coa[c]} \rightleftharpoons 12\text{dacyl-g}_3\text{p[c]} + \text{coa[c]}$      |
| DAGZ/DAGK6      | $12\text{dacyl-g}_3\text{p[c]} + \text{adp} \rightleftharpoons 12\text{dag[c]} + \text{atp}$                               |
| DGAT1           | $12\text{dag[c]} + 234\text{pal-coa[c]} \rightleftharpoons \text{tag[c]} + \text{coa[c]}$                                  |

|                |                                                                    |
|----------------|--------------------------------------------------------------------|
| St_TAG         | tag[c] -->                                                         |
| ACAS2          | prop[c] + atp + coa[c] --> prop-coa[c] + adp + p                   |
| ACSM-But       | but[c] + atp + coa[c] --> butyryl-coa[c] + adp + p                 |
| ASCM-5c        | 5c-fa[c] + atp + coa[c] --> 5c-234acyl-coa[c] + adp + p            |
| ASCM-6c        | 6c-fa[c] + atp + coa[c] --> 6c-234acyl-coa[c] + adp + p            |
| ACSM-8c        | 8c-fa[c] + atp + coa[c] --> 8c-234acyl-coa[c] + adp + p            |
| ACSM-9c        | 9c-fa[c] + atp + coa[c] --> 9c-234acyl-coa[c] + adp + p            |
| ACSM-10c       | 10c-fa[c] + atp + coa[c] --> 10c-234acyl-coa[c] + adp + p          |
| ACSM-12c       | 12c-fa[c] + atp + coa[c] --> 12c-234acyl-coa[c] + adp + p          |
| ACSM-14c       | 14c-fa[c] + atp + coa[c] --> 14c-234acyl-coa[c] + adp + p          |
| ACSM-18c       | 18c-fa[c] + atp + coa[c] --> 18c-234acyl-coa[c] + adp + p          |
| CPT1B/CHKL     | prop-coa[c] + carn[c] --> prop-carn[c] + coa[c]                    |
| CPT1B/CHKL     | butyryl-coa[c] + carn[c] --> butyryl-carn[c] + coa[c]              |
| CPT1B/CHKL     | 5c-234acyl-coa[c] + carn[c] --> 5c-234acyl-carn[c] + coa[c]        |
| CPT1B/CHKL     | 6c-234acyl-coa[c] + carn[c] --> 6c-234acyl-carn[c] + coa[c]        |
| CPT1B/CHKL     | 8c-234acyl-coa[c] + carn[c] --> 8c-234acyl-carn[c] + coa[c]        |
| CPT1B/CHKL     | 9c-234acyl-coa[c] + carn[c] --> 9c-234acyl-carn[c] + coa[c]        |
| CPT1B/CHKL     | 10c-234acyl-coa[c] + carn[c] --> 10c-234acyl-carn[c] + coa[c]      |
| CPT1B/CHKL     | 12c-234acyl-coa[c] + carn[c] --> 12c-234acyl-carn[c] + coa[c]      |
| CPT1B/CHKL     | 14c-234acyl-coa[c] + carn[c] --> 14c-234acyl-carn[c] + coa[c]      |
| CPT1B/CHKL     | 18c-234acyl-coa[c] + carn[c] --> 18c-234acyl-carn[c] + coa[c]      |
| SLC25A20/CACT  | prop-carn[c] + carn[m] --> prop-carn[m] + carn[c]                  |
| SLC25A20/CACT  | butyryl-carn[c] + carn[m] --> butyryl-carn[m] + carn[c]            |
| SLC25A20/CACT  | 5c-234acyl-carn[c] + carn[m] --> 5c-234acyl-carn[m] + carn[c]      |
| SLC25A20/CACT  | 6c-234acyl-carn[c] + carn[m] --> 6c-234acyl-carn[m] + carn[c]      |
| SLC25A20/CACT  | 8c-234acyl-carn[c] + carn[m] --> 8c-234acyl-carn[m] + carn[c]      |
| SLC25A20/CACT  | 9c-234acyl-carn[c] + carn[m] --> 9c-234acyl-carn[m] + carn[c]      |
| SLC25A20/CACT  | 10c-234acyl-carn[c] + carn[m] --> 10c-234acyl-carn[m] + carn[c]    |
| SLC25A20/CACT  | 12c-234acyl-carn[c] + carn[m] --> 12c-234acyl-carn[m] + carn[c]    |
| SLC25A20/CACT  | 14c-234acyl-carn[c] + carn[m] --> 14c-234acyl-carn[m] + carn[c]    |
| SLC25A20/CACT  | 18c-234acyl-carn[c] + carn[m] --> 18c-234acyl-carn[m] + carn[c]    |
| CPT2           | prop-carn[m] + coa[m] --> prop-coa[m] + carn[m]                    |
| CPT2           | butyryl-carn[m] + coa[m] --> butyryl-coa[m] + carn[m]              |
| CPT2           | 5c-234acyl-carn[m] + coa[m] --> 5c-234acyl-coa[m] + carn[m]        |
| CPT2           | 6c-234acyl-carn[m] + coa[m] --> 6c-234acyl-coa[m] + carn[m]        |
| CPT2           | 8c-234acyl-carn[m] + coa[m] --> 8c-234acyl-coa[m] + carn[m]        |
| CPT2           | 9c-234acyl-carn[m] + coa[m] --> 9c-234acyl-coa[m] + carn[m]        |
| CPT2           | 10c-234acyl-carn[m] + coa[m] --> 10c-234acyl-coa[m] + carn[m]      |
| CPT2           | 12c-234acyl-carn[m] + coa[m] --> 12c-234acyl-coa[m] + carn[m]      |
| CPT2           | 14c-234acyl-carn[m] + coa[m] --> 14c-234acyl-coa[m] + carn[m]      |
| CPT2           | 18c-234acyl-carn[m] + coa[m] --> 18c-234acyl-coa[m] + carn[m]      |
| AcylCoADeh-9-c | 9c-234acyl-coa[m] + fad[m] --> 9c-t2enoyl-coa[m] + fadh2[m]        |
| EnoCoADeh-9c   | 9c-t2enoyl-coa[m] + h2o <==> 9c-3ohacyl-coa[m]                     |
| 3HA-CoADeh-9c  | 9c-3ohacyl-coa[m] + nad[m] <==> 9c-3ketoacyl-coa[m] + nadh[m]      |
| AcylCoAAT-9c   | 9c-3ketoacyl-coa[m] + coa[m] --> 7c-234acyl-coa[m] + acetyl-coa[m] |
| AcylCoADeh-7-c | 7c-234acyl-coa[m] + fad[m] --> 7c-t2enoyl-coa[m] + fadh2[m]        |
| EnoCoADeh-7c   | 7c-t2enoyl-coa[m] + h2o <==> 7c-3ohacyl-coa[m]                     |

3HA-CoADeh-7c  $7c\text{-}3\text{ohacyl}\text{-coa[m]} + \text{nad[m]} \rightleftharpoons 7c\text{-}3\text{ketoacyl}\text{-coa[m]} + \text{nadh[m]}$   
AcylCoAAT-7c  $7c\text{-}3\text{ketoacyl}\text{-coa[m]} + \text{coa[m]} \rightarrow 5c\text{-}234\text{acyl}\text{-coa[m]} + \text{acetyl}\text{-coa[m]}$   
AcylCoADeh-5-c  $5c\text{-}234\text{acyl}\text{-coa[m]} + \text{fad[m]} \rightarrow 5c\text{-}t2\text{enoyl}\text{-coa[m]} + \text{fadh2[m]}$   
EnoCoADeh-5c  $5c\text{-}t2\text{enoyl}\text{-coa[m]} + \text{h2o} \rightleftharpoons 5c\text{-}3\text{ohacyl}\text{-coa[m]}$   
3HA-CoADeh-5c  $5c\text{-}3\text{ohacyl}\text{-coa[m]} + \text{nad[m]} \rightleftharpoons 5c\text{-}3\text{ketoacyl}\text{-coa[m]} + \text{nadh[m]}$   
AcylCoAAT-5c  $5c\text{-}3\text{ketoacyl}\text{-coa[m]} + \text{coa[m]} \rightarrow \text{acetyl}\text{-coa[m]} + \text{prop}\text{-coa[m]}$   
AKR1A1  $\text{glyc[c]} + \text{nadp[c]} \rightarrow \text{glyc}\text{-ald[c]} + \text{nadph[c]}$   
ALDH3A2  $\text{glyc}\text{-ald[c]} + \text{nad[c]} + \text{h2o} \rightarrow \text{glyc}\text{-ate[c]} + \text{nadh[c]}$   
GLYCTK  $\text{glyc}\text{-ate[c]} + \text{atp} \rightarrow 3\text{pg[c]} + \text{adp} + \text{p}$   
EAA\_arg  $\text{arg[c]} \rightleftharpoons$   
EAA\_his  $\text{his[c]} \rightleftharpoons$   
EAA\_ile  $\text{ile[c]} \rightleftharpoons$   
EAA\_leu  $\text{leu[c]} \rightleftharpoons$   
EAA\_lys  $\text{lys[c]} \rightleftharpoons$   
EAA\_met  $\text{met[c]} \rightleftharpoons$   
EAA\_phe  $\text{phe[c]} \rightleftharpoons$   
EAA\_thr  $\text{thr[c]} \rightleftharpoons$   
EAA\_trp  $\text{trp[c]} \rightleftharpoons$   
EAA\_val  $\text{val[c]} \rightleftharpoons$   
NEAA\_ala  $\text{ala[c]} \rightleftharpoons$   
NEAA\_asn  $\text{asn[c]} \rightleftharpoons$   
NEAA\_asp  $\text{asp[c]} \rightleftharpoons$   
NEAA\_cys  $\text{cys[c]} \rightleftharpoons$   
NEAA\_glu  $\text{glu[c]} \rightleftharpoons$   
NEAA\_gln  $\text{gln[c]} \rightleftharpoons$   
NEAA\_gly  $\text{gly[c]} \rightleftharpoons$   
NEAA\_pro  $\text{pro[c]} \rightleftharpoons$   
NEAA\_ser  $\text{ser[c]} \rightleftharpoons$   
NEAA\_tyr  $\text{tyr[c]} \rightleftharpoons$   
DLDH  $\text{laN6dhpl[m]} + \text{nad[m]} \rightleftharpoons \text{laN6ll[m]} + \text{nadh[m]}$   
MT\_val  $\text{val[c]} \rightarrow \text{val[m]}$   
BCAT2-val  $\text{val[m]} + \text{akg[m]} \rightarrow \text{akisov[m]} + \text{glu[m]}$   
BCKDHB-val  $\text{akisov[m]} + \text{laN6ll[m]} \rightarrow \text{laN6S2mpdhl[m]} + \text{co2}$   
BCKADE2-val  $\text{laN6S2mpdhl[m]} + \text{coa[m]} \rightarrow \text{laN6dhpl[m]} + \text{isob}\text{-coa[m]}$   
ACADSB  $\text{isob}\text{-coa[m]} + \text{fad[m]} \rightarrow \text{methacrl}\text{-coa[m]} + \text{fadh2[m]}$   
ECHS1  $\text{methacrl}\text{-coa[m]} + \text{h2o} \rightarrow 3\text{hisob}\text{-coa[m]}$   
HIBCH  $3\text{hisob}\text{-coa[m]} + \text{h2o} \rightarrow 3\text{hisob[m]} + \text{coa[m]}$   
HIBADH  $3\text{hisob[m]} + \text{nad[m]} \rightarrow \text{methmalsemald[m]} + \text{nadh[m]}$   
ALDH6A1  $\text{methmalsemald[m]} + \text{nad[m]} + \text{coa[m]} + \text{h2o} \rightarrow \text{prop}\text{-coa[m]} + \text{hco3} + \text{nadh[m]}$   
PCCB  $\text{prop}\text{-coa[m]} + \text{atp} + \text{hco3} \rightarrow \text{Smethmal}\text{-coa[m]} + \text{adp} + \text{p}$   
MCEE  $\text{Smethmal}\text{-coa[m]} \rightarrow \text{Rmethmal}\text{-coa[m]}$   
MUT  $\text{Rmethmal}\text{-coa[m]} \rightarrow \text{suc}\text{-coa[m]}$   
MT\_ile  $\text{ile[c]} \rightarrow \text{ile[m]}$   
BCAT-ile  $\text{ile[m]} + \text{akg[m]} \rightarrow \text{ak3mvalt[m]} + \text{glu[m]}$   
BCKDHB-ile  $\text{ak3mvalt[m]} + \text{laN6ll[m]} \rightarrow \text{eN6S2mbdhlpl[m]} + \text{co2}$   
BCKADE2-ile  $\text{eN6S2mbdhlpl[m]} + \text{coa[m]} \rightarrow \text{laN6dhpl[m]} + \text{t2metbut2en}\text{-coa[m]}$   
ECHS1  $\text{t2metbut2en}\text{-coa[m]} + \text{h2o} \rightarrow 3\text{oh2metbut}\text{-coa[m]}$



HSD17B10 3oh2metbut-coa[m] + nad[m] --> 2met-acetoacetyl-coa[m] + nadh[m]  
ACAT1 2met-acetoacetyl-coa[m] + coa[m] --> prop-coa[m] + acetyl-coa[m]  
MT\_leu leu[c] --> leu[m]  
BCAT2-leu leu[m] + akg[m] --> akiso[m] + glu[m]  
BCKDHB-leu akiso[m] + laN6ll[m] --> eN6S3mbdhpl[m] + co2  
BCKADE2-leu eN6S3mbdhpl[m] + coa[m] --> laN6dhpl[m] + isov-coa[m]  
IVD isov-coa[m] + fad[m] --> 3mc-coa[m] + fadh2[m]  
MCC1,MCC2 3mc-coa[m] + atp + hco3 --> 3mg-coa[m] + adp + p  
MGCA 3mg-coa[m] + h2o --> 3h3mg-coa[m]  
HMGCL 3h3mg-coa[m] --> acetacet[m] + acetyl-coa[m]  
OXCT acetacet[m] + suc-coa[m] --> suc[m] + acetoacetyl-coa[m]  
HMGCS2 acetoacetyl-coa[m] + acetyl-coa[m] + h2o --> 3h3mg-coa[m] + coa[m]  
GluDeh glu[m] + nadp[m] + h2o <==> akg[m] + nadph[m] + nh3  
GlnSynth nh3 + glu[c] + atp --> gln[c] + adp + p  
GLN\_Elim gln[c] -->  
ALT glu[c] + pyr[c] <==> akg[c] + ala[c]  
ALA\_Elim ala[c] -->  
SDS ser[c] --> pyr[c] + nh3  
CBS ser[c] + hcys[c] --> cyst[c] + h2o  
CTH cyst[c] + h2o --> nh3 + cys[c] + 2ob[c]  
ILVBL pyr[c] + 2ob[c] --> 2a2hbut[c] + co2  
2a2hButLeak 2a2hbut[c] -->  
MT\_lys lys[c] --> lys[m]  
AASS lys[m] + akg[m] + nadh[m] <==> sacpn[m] + nad[m] + h2o  
AASS sacpn[m] + nad[m] + h2o <==> 2aap6semald[m] + glu[m] + nadh[m]  
aAASADeh 2aap6semald[m] + nad[m] + h2o <==> aaap[m] + nadh[m]  
KATII aaap[m] + akg[m] <==> glu[m] + akap[m]  
lysdeg akap[m] + nad[m] + coa[m] <==> glut-coa[m] + nadh[m] + co2  
GCDH glut-coa[m] + fad[m] <==> tbut2enoyl-coa[m] + fadh2[m]  
MT\_pro pro[c] --> pro[m]  
PRODH pro[m] + fad[m] --> 1pyrr5carb[m] + fadh2[m]  
ALDH4a1 1pyrr5carb[m] + nad[m] + 2 h2o --> glu[m] + nadh[m]  
GATM gly[c] + arg[c] --> guan[c] + orn[m]  
Dr\_orn orn[m] -->  
GAMT guan[c] + sal-met[c] --> cr + sal-hcys[c]  
Dr\_cr cr -->  
AdoHcyase sal-hcys[c] + h2o --> hcys[c] + amp  
MTR hcys[c] + 5meth-thf[c] <==> met[c] + thf[c]  
AdoMet atp + met[c] + h2o --> sal-met[c] + 2 p  
SHMT ser[c] + thf[c] <==> gly[c] + 5methyln-thf[c]  
MTHFR 5methyln-thf[c] + nadph[c] --> 5meth-thf[c] + nadp[c]  
DHFR dhf[c] + nadph[c] --> thf[c] + nadp[c]  
HAL his[c] --> uro[c] + nh3  
FLJ31300 uro[c] + h2o --> 4im5prop[c]  
MGC35366 4im5prop[c] + h2o --> form-glu[c]  
FTCD1 form-glu[c] + thf[c] --> glu[c] + form-thf[c]  
FTCD2 form-thf[c] <==> 5methn-thf[c] + nh3

FT 5methn-thf[c] + nadh[c] <==> 5methyln-thf[c] + nad[c]  
 ASNase asn[c] + h2o --> asp[c] + nh3  
 ASNSynth gln[c] + asp[c] + atp + h2o --> glu[c] + asn[c] + amp + 2 p  
 PHGDH 3pg[c] + nad[c] --> 3phdpyr[c] + nadh[c]  
 PSA 3phdpyr[c] + glu[c] --> 3pser[c] + akg[c]  
 PSPH 3pser[c] + h2o --> ser[c] + p  
 P5CS glu[m] + atp --> glu-5-p[m] + adp + p  
 PYCS glu-5-p[m] + nadph[m] --> glu-5-semald[m] + nadp[m]  
 Spont glu-5-semald[m] --> 1pyrr5carb[m] + h2o  
 PYRCR1 1pyrr5carb[m] + nadph[m] --> pro[m] + nadp[m]  
 PAG phe[c] + thb[c] --> tyr[c] + 4ah-thb[c]  
 PCBD 4ah-thb[c] --> dhb[c] + h2o  
 QDPR dhb[c] + nadh[c] --> thb[c] + nad[c]  
 MT\_glu glu[m] <==> glu[c]  
 tRNA trna[c] <==>  
 YARS trna[c] + tyr[c] + atp <==> trna-tyr[c] + amp + 2 p  
 WARS trna[c] + trp[c] + atp <==> trna-trp[c] + amp + 2 p  
 TARS trna[c] + thr[c] + atp <==> trna-thr[c] + amp + 2 p  
 LARS trna[c] + leu[c] + atp <==> trna-leu[c] + amp + 2 p  
 IARS trna[c] + ile[c] + atp <==> trna-ile[c] + amp + 2 p  
 KARS trna[c] + lys[c] + atp <==> trna-lys[c] + amp + 2 p  
 AARS trna[c] + ala[c] + atp <==> trna-ala[c] + amp + 2 p  
 VARS trna[c] + val[c] + atp <==> trna-val[c] + amp + 2 p  
 MARS trna[c] + met[c] + atp <==> trna-met[c] + amp + 2 p  
 SARS trna[c] + ser[c] + atp <==> trna-ser[c] + amp + 2 p  
 DARS trna[c] + asp[c] + atp <==> trna-asp[c] + amp + 2 p  
 GARS trna[c] + gly[c] + atp <==> trna-gly[c] + amp + 2 p  
 PARS trna[c] + pro[c] + atp <==> trna-pro[c] + amp + 2 p  
 CARS trna[c] + cys[c] + atp <==> trna-cys[c] + amp + 2 p  
 EPRS trna[c] + glu[c] + atp <==> trna-glu[c] + amp + 2 p  
 QARS trna[c] + gln[c] + atp <==> trna-gln[c] + amp + 2 p  
 RARS trna[c] + arg[c] + atp <==> trna-arg[c] + amp + 2 p  
 FARS trna[c] + phe[c] + atp <==> trna-phe[c] + amp + 2 p  
 HARS trna[c] + his[c] + atp <==> trna-his[c] + amp + 2 p  
 NARS trna[c] + asn[c] + atp <==> trna-asn[c] + amp + 2 p  
 ACT 29 trna-ala[c] + 6 trna-cys[c] + 22 trna-asp[c] + 28 trna-glu[c] + 12 trna-phe[c] + 28  
 MYOHC1-2x 171 trna-ala[c] + 17 trna-cys[c] + 98 trna-asp[c] + 261 trna-glu[c] + 56 trna-phe[c] +  
 MYOHC2a 172 trna-ala[c] + 18 trna-cys[c] + 93 trna-asp[c] + 265 trna-glu[c] + 58 trna-phe[c] +  
 MYOHC2b 168 trna-ala[c] + 17 trna-cys[c] + 94 trna-asp[c] + 263 trna-glu[c] + 61 trna-phe[c] +  
 MYOLCk 56 trna-ala[c] + 10 trna-cys[c] + 30 trna-asp[c] + 48 trna-glu[c] + 20 trna-phe[c] + 48  
 MYOLCp 12 trna-ala[c] + 2 trna-cys[c] + 15 trna-asp[c] + 15 trna-glu[c] + 12 trna-phe[c] + 13  
 MYO1-2x 2 myoHC1-2x[c] + 2 myoLCK[c] + 2 myoLCP[c] --> myo1[c]  
 MYO2a 2 myoHC2a[c] + 2 myoLCK[c] + 2 myoLCP[c] --> myo2a[c]  
 MYO2x 2 myoHC1-2x[c] + 2 myoLCK[c] + 2 myoLCP[c] --> myo2x[c]  
 MYO2b 2 myoHC2b[c] + 2 myoLCK[c] + 2 myoLCP[c] --> myo2b[c]  
 TMN1 38 trna-ala[c] + 1 trna-cys[c] + 19 trna-asp[c] + 61 trna-glu[c] + 1 trna-phe[c] + 3 trr  
 TMN2 28 trna-ala[c] + 3 trna-cys[c] + 14 trna-asp[c] + 54 trna-glu[c] + 1 trna-phe[c] + 4 trr

DIM-TMN1 2 tmn1[c] --> dim-tmn1[c]  
 DIM-TMN2 2 tmn2[c] --> dim-tmn2[c]  
 TPNC1 7 trna-ala[c] + 2 trna-cys[c] + 23 trna-asp[c] + 23 trna-glu[c] + 9 trna-phe[c] + 12 trr  
 TPNC2 12 trna-ala[c] + 1 trna-cys[c] + 19 trna-asp[c] + 26 trna-glu[c] + 10 trna-phe[c] + 13  
 TPNI1 15 trna-ala[c] + 3 trna-cys[c] + 10 trna-asp[c] + 22 trna-glu[c] + 2 trna-phe[c] + 6 trr  
 TPNI2 13 trna-ala[c] + 3 trna-cys[c] + 11 trna-asp[c] + 25 trna-glu[c] + 3 trna-phe[c] + 7 trr  
 TPNT1 20 trna-ala[c] + 1 trna-cys[c] + 12 trna-asp[c] + 54 trna-glu[c] + 6 trna-phe[c] + 12 trn  
 TPNT2 24 trna-ala[c] + 18 trna-asp[c] + 49 trna-glu[c] + 4 trna-phe[c] + 9 trna-gly[c] + 4 trn  
 TPN1 tpnc1[c] + tpni1[c] + tpnt1[c] --> tpn1[c]  
 TPN2 tpnc2[c] + tpni2[c] + tpnt2[c] --> tpn2[c]  
 CONTR-COMP1 7 act[c] + 7 myo1[c] + dim-tmn1[c] + tpn1[c] --> contr-comp1[c]  
 CONTR-COMP2a 7 act[c] + 7 myo2a[c] + dim-tmn2[c] + tpn2[c] --> contr-comp2a[c]  
 CONTR-COMP2x 7 act[c] + 7 myo2x[c] + dim-tmn2[c] + tpn2[c] --> contr-comp2x[c]  
 CONTR-COMP2b 7 act[c] + 7 myo2b[c] + dim-tmn2[c] + tpn2[c] --> contr-comp2b[c]  
 Str\_CONTR-COMP1 contr-comp1[c] -->  
 Str\_CONTR-COMP2a contr-comp2a[c] -->  
 Str\_CONTR-COMP2x contr-comp2x[c] -->  
 Str\_CONTR-COMP2b contr-comp2b[c] -->  
 CKM cr-p + adp <==> cr + atp  
 Spont cr-p <==> cr + p  
 Nut\_cr cr <==>  
 ATP2UTP atp --> utp  
 UDP2ADP udp --> adp  
 PGM1 g6p[c] <==> g1p[c]  
 UGP2 g1p[c] + utp --> udp-g1p[c] + (2) p  
 mGYG udp-g1p[c] <==> glycogen[c] + udp  
 mGYS1 glycogen[c] -->  
 G6PD g6p[c] + nadp[c] <==> gluc-lac-6p[c] + nadph[c]  
 PGLS gluc-lac-6p[c] + h2o <==> 6pgluconate[c]  
 PGD 6pgluconate[c] + nadp[c] <==> ru5p[c] + co2 + nadph[c]  
 PGD 6pgluconate[c] + nad[c] <==> ru5p[c] + co2 + nadh[c]  
 RPE ru5p[c] <==> x5p[c]  
 RPIA ru5p[c] <==> r5p[c]  
 TKT1 e4p[c] + x5p[c] <==> f6p[c] + g3p[c]  
 TKT2 s7p[c] + g3p[c] <==> r5p[c] + x5p[c]  
 TALDO s7p[c] + g3p[c] <==> e4p[c] + f6p[c]  
 RBSK rib[c] + atp <==> r5p[c] + adp + p  
 GCL cys[c] + glu[c] + atp --> glu-cys[c] + p + adp  
 GSS glu-cys[c] + gly[c] + atp --> glutath[c] + adp + p  
 glutathxport glutath[c] <==> glutath[m]  
 GSR 2 glutath[c] + nadp[c] --> gssg[c] + nadph[c]  
 GSR 2 glutath[m] + nadp[m] --> gssg[m] + nadph[m]  
 GlutathLeak gssg[c] -->  
 GlutathLeak gssg[m] -->  
 Recycle\_nadp nadph[c] --> nadp[c]  
 fa-c6 leak 6c-3ketoacyl-coa[m] -->  
 acetyLeak(mit) acetyl-coa[m] -->





|   |             |
|---|-------------|
| 0 | 0           |
| 0 | 0           |
| 0 | -0.23       |
| 0 | 0           |
| 0 | 0           |
| 0 | -0.23       |
| 0 | 0           |
| 0 | 0           |
| 0 | 0           |
| 0 | 0           |
| 0 | -5          |
| 0 | -4.999995   |
| 0 | -4.99999833 |
| 0 | 0           |
| 0 | -4.99999833 |
| 0 | 4.999998333 |
| 0 | -9.99999833 |
| 0 | -9.99999833 |
| 0 | -9.79823591 |
| 0 | -9.79823591 |
| 0 | -9.74687638 |
| 0 | 0.229204473 |
| 0 | 0           |
| 0 | -0.17784495 |
| 0 | 0           |
| 0 | -10.2318173 |
| 0 | -10.4096623 |
| 0 | 0           |
| 0 | -10.2318173 |
| 0 | -10.9633417 |
| 0 | -9.99999833 |
| 0 | -10.9633417 |
| 0 | 0           |
| 0 | -9.99999833 |
| 0 | -12.5841021 |
| 0 | -12.5841021 |
| 0 | 0           |
| 0 | -12.5841021 |
| 0 | -13.288703  |
| 0 | -13.2901376 |
| 0 | -13.3156265 |
| 0 | -13.3156265 |
| 0 | -23.5474438 |
| 0 | -48.7454862 |
| 0 | -28.0901313 |
| 0 | -76.8356175 |
| 0 | -38.4178088 |

|   |             |
|---|-------------|
| 0 | -202.416721 |
| 0 | -0.19219252 |
| 0 | -0.125      |
| 0 | -0.125      |
| 0 | -0.125      |
| 0 | -0.125      |
| 0 | 0           |
| 0 | 0           |
| 0 | 0           |
| 0 | 0           |
| 0 | -0.125      |
| 0 | -0.125      |
| 0 | -0.125      |
| 0 | -0.125      |
| 0 | 0           |
| 0 | 0           |
| 0 | 0           |
| 0 | 0           |
| 0 | -0.355      |
| 0 | -0.355      |
| 0 | -0.355      |
| 0 | -0.355      |
| 0 | -0.355      |
| 0 | -0.355      |
| 0 | -0.355      |
| 0 | -0.355      |
| 0 | -0.355      |
| 0 | -0.355      |
| 0 | -0.355      |
| 0 | -0.355      |
| 0 | -0.355      |
| 0 | -0.355      |
| 0 | -0.355      |
| 0 | -0.355      |
| 0 | -0.355      |
| 0 | -0.355      |
| 0 | -0.355      |
| 0 | -0.355      |
| 0 | -0.355      |
| 0 | -0.355      |
| 0 | -0.30941967 |
| 0 | -0.30941967 |
| 0 | -0.33490861 |
| 0 | 0           |
| 0 | 0           |
| 0 | 0           |
| 0 | 0           |
| 0 | 0           |





|   |             |
|---|-------------|
| 0 | 0           |
| 0 | 0           |
| 0 | 0           |
| 0 | 0           |
| 0 | 0           |
| 0 | 0           |
| 0 | 0           |
| 0 | 0           |
| 0 | 0           |
| 0 | 0           |
| 0 | -0.01390839 |
| 0 | -0.03483918 |
| 0 | 0           |
| 0 | 0           |
| 0 | -0.07252335 |
| 0 | -0.00748562 |
| 0 | -0.00888755 |
| 0 | -0.01417574 |
| 0 | -0.00148017 |
| 0 | 0           |
| 0 | 0           |
| 0 | -0.57815767 |
| 0 | 0           |
| 0 | -0.00307771 |
| 0 | 0           |
| 0 | 0           |
| 0 | -0.0441636  |
| 0 | 0           |
| 0 | -0.18552646 |
| 0 | -0.00520342 |
| 0 | -0.0524124  |
| 0 | -0.01263688 |
| 0 | -0.01263688 |
| 0 | -0.01263688 |
| 0 | -0.01263688 |
| 0 | -0.01263688 |
| 0 | -0.01263688 |
| 0 | -0.01263688 |
| 0 | -0.01263688 |
| 0 | -0.01263688 |
| 0 | -0.01263688 |
| 0 | -0.02692346 |
| 0 | -0.02692346 |
| 0 | -0.02692346 |
| 0 | -0.01428659 |
| 0 | -0.01428659 |
| 0 | -0.01428659 |
| 0 | -0.01428659 |
| 0 | -0.01428659 |

0 -0.01428659  
0 -0.01428659  
0 -0.02548894  
0 -0.02548894  
0 -0.02548894  
0 -0.02548894  
0 -0.02548894  
0 -0.02548894  
0 -0.02548894  
0 -0.02548894  
0 -0.02548894  
0 0  
0 0.06567172  
0 0.125764828  
0 0.677957554  
0 0.023917478  
0 0  
0 0  
0 0  
0 0  
0 0  
0 0  
0 0.045580329  
0 0.045580329  
0 0.045580329  
0 0.045580329  
0 0.045580329  
0 0.045580329  
0 0.045580329  
0 0.045580329  
0 -0.00852892  
0 -12.5269593  
0 -0.00852892  
0 0  
0 0  
0 0  
0 0  
0 0  
0 0  
0 0  
0 -0.03004655  
0 0  
0 0  
0 0.030046554  
0 0.030046554  
0 0.030046554  
0 0.030046554  
0 0.030046554

0 0.030046554  
0 0  
0 -0.56777691  
0 -0.20176243  
0 -0.20176243  
0 -0.20176243  
0 0  
0 0  
0 0  
0 -12.5184304  
0 0  
0 0  
0 0  
0 -0.03545238  
0 -2.7535E-16  
0 0.005203421  
0 0.001480171  
0 0.014175736  
0 0.025488938  
0 0.014286585  
0 0.026943026  
0 0.023917478  
0 0.012636879  
0 0.007485623  
0 0.013810583  
0 0.014097489  
0 0.01411705  
0 0.008528915  
0 0.003077713  
0 0.032576805  
0 0.01558418  
0 0.013908392  
0 0.008887547  
0 0.004792624  
0 0.010380759  
0 4.5644E-05  
0 0  
0 9.12881E-05  
0 0  
0 9.12881E-05  
0 9.12881E-05  
0 0  
0 4.5644E-05  
0 0  
0 0  
0 0  
0 1.30412E-05



0

0



|            |          |          |          |          |          |          |          |          |
|------------|----------|----------|----------|----------|----------|----------|----------|----------|
| FAT10c     | 0        | 0        | 0        | 0        | 0        | 0        | 0        | 0        |
| FAT12c     | 0        | 0        | 0        | 0        | 0        | 0        | 0        | 0        |
| FAT14c     | 0.23     | 0.23     | 0.23     | 0.23     | 0.23     | 0.23     | 0        | 0.23     |
| FAT18c     | 0        | 0        | 0        | 0        | 0        | 0        | 0        | 0        |
| Alc_glyc   | 0        | 0        | 0        | 0        | 0        | 0        | 0        | 0        |
| COA        | 0.23     | 0.23     | 0.23     | 0.23     | 0.23     | 0.23     | 0        | 0.23     |
| SLC22A5/O  | 0        | 0        | 0        | 0        | 0        | 0        | 0        | 0        |
| Xport_rib  | 0        | 0        | 0        | 0        | 0        | 0        | 0        | 0        |
| Dr_akg     | 0        | 0        | 0        | 0        | 0        | 0        | 0        | 0        |
| Dr_oaa     | 0        | 0        | 0        | 0        | 0        | 0        | 0        | 0        |
| Hex        | 5        | 5        | 5        | 5        | 5        | 5        | -1.9E-18 | 5        |
| PGI        | 4.999995 | 4.999995 | 4.999995 | 4.999995 | 4.999995 | 4.999995 | -1.9E-18 | 4.999995 |
| PFK        | 4.999998 | 4.999998 | 4.999998 | 4.999998 | 4.999998 | 4.999998 | -1.9E-18 | 4.999998 |
| FBP        | 0        | 0        | 0        | 0        | 0        | 0        | 0        | 0        |
| Ald        | 4.999998 | 4.999998 | 4.999998 | 4.999998 | 4.999998 | 4.999998 | -1.9E-18 | 4.999998 |
| TPI        | -5       | -5       | -5       | -5       | -5       | -5       | 1.88E-18 | -5       |
| D3PDeh     | 9.999998 | 9.999998 | 9.999998 | 9.999998 | 9.999998 | 9.999998 | -3.8E-18 | 9.999998 |
| PGK        | 9.999998 | 9.999998 | 9.999998 | 9.999998 | 9.999998 | 9.999998 | -3.8E-18 | 9.999998 |
| PGM        | 9.569031 | 9.569031 | 9.569031 | -0.36897 | 9.746876 | 9.569031 | -0.2292  | 9.569031 |
| Eno        | 9.569031 | 9.569031 | 9.569031 | -0.36897 | 9.746876 | 9.569031 | -0.2292  | 9.569031 |
| PyrK       | 9.746876 | 9.746876 | 9.746876 | 9.746876 | 9.746876 | 9.746876 | 0        | 9.746876 |
| PEPSynth   | 0        | 0        | 0        | 0        | 0        | 0        | 0.229204 | 0        |
| PEPCarbK   | 0        | 0        | 0        | 0        | 0        | 0        | 0        | 0        |
| PEPCarbl   | 0.177845 | 0.177845 | 0.177845 | 10.11584 | 0        | 0.177845 | 0        | 0.177845 |
| LacDeh     | 0        | 0        | 0        | 0        | 0        | 0        | 0        | 0        |
| MalDehC(n  | 10.43098 | 10.43098 | 10.43098 | 20.36898 | 10.25313 | 10.43098 | 0.199158 | 10.43098 |
| ASTC       | 10.60882 | 10.60882 | 10.60882 | 30.48482 | 10.25313 | 10.60882 | 0.199158 | 10.60882 |
| G3PDehC    | 0        | 0        | 0        | 0        | 0        | 0        | 0        | 0        |
| Mal-AKGEX  | 10.43098 | 10.43098 | 10.43098 | 20.36898 | 10.25313 | 10.43098 | 0.199158 | 10.43098 |
| Glu-AspEx  | 11.22473 | 11.22473 | 11.22473 | 31.10073 | 11.04688 | 11.22473 | 0.261387 | 11.22473 |
| MCT        | 9.999998 | 9.999998 | 9.999998 | 9.999998 | 9.999998 | 9.999998 | 0        | 9.999998 |
| ASTM       | 11.22473 | 11.22473 | 11.22473 | 31.10073 | 11.04688 | 11.22473 | 0.261387 | 11.22473 |
| G3PDehM    | 0        | 0        | 0        | 0        | 0        | 0        | 0        | 0        |
| PyrSynth/P | 9.999998 | 9.999998 | 9.999998 | 9.999998 | 9.999998 | 9.999998 | 0        | 9.999998 |
| CitSynth   | 12.70003 | 12.70003 | 12.70003 | 22.63803 | 13.05572 | 12.70003 | 0.11593  | 12.70003 |
| Acon       | 12.70003 | 12.70003 | 12.70003 | 22.63803 | 13.05572 | 12.70003 | 0.11593  | 12.70003 |
| IsoDeh     | 0        | 0        | 0        | 0        | 0        | 0        | 0        | 0        |
| IsoDehnadj | 12.70003 | 12.70003 | 12.70003 | 22.63803 | 13.05572 | 12.70003 | 0.11593  | 12.70003 |
| AKGDeh     | 13.2887  | 13.2887  | 13.2887  | 23.2267  | 13.64439 | 13.2887  | 0        | 13.2887  |
| SunCoaSyn  | 13.45591 | 13.45591 | 13.45591 | 33.33191 | 13.63376 | 13.45591 | 0.165775 | 13.45591 |
| SucDeh(I)  | 13.49379 | 13.49379 | 13.49379 | 33.36979 | 13.84948 | 13.49379 | 0.178159 | 13.49379 |
| Fum        | 13.49379 | 13.49379 | 13.49379 | 33.36979 | 13.84948 | 13.49379 | 0.178159 | 13.49379 |
| MalDehM    | 23.92476 | 23.92476 | 23.92476 | 53.73876 | 24.10261 | 23.92476 | 0.377317 | 23.92476 |
| NADHDeh(   | 49.89181 | 49.89181 | 49.89181 | 109.5198 | 50.60319 | 49.89181 | 1.146327 | 49.89181 |
| ETFUO      | 28.85488 | 28.85488 | 28.85488 | 58.66888 | 29.92195 | 28.85488 | 0.764746 | 28.85488 |
| UCytC(III) | 78.74669 | 78.74669 | 78.74669 | 168.1887 | 80.52514 | 78.74669 | 1.911073 | 78.74669 |
| CytCO(IV)  | 39.37335 | 39.37335 | 39.37335 | 84.09435 | 40.26257 | 39.37335 | 0.955537 | 39.37335 |







|            |          |          |          |          |          |          |          |          |
|------------|----------|----------|----------|----------|----------|----------|----------|----------|
| 3HA-CoADe  | 0        | 0        | 0        | 0        | 0        | 0        | 0        | 0        |
| AcylCoAAT  | 0        | 0        | 0        | 0        | 0        | 0        | 0        | 0        |
| AcylCoADe  | 0        | 0        | 0        | 0        | 0        | 0        | 0        | 0        |
| EnoCoADel  | 0        | 0        | 0        | 0        | 0        | 0        | 0        | 0        |
| 3HA-CoADe  | 0        | 0        | 0        | 0        | 0        | 0        | 0        | 0        |
| AcylCoAAT  | 0        | 0        | 0        | 0        | 0        | 0        | 0        | 0        |
| AKR1A1     | 0        | 0        | 0        | 0        | 0        | 0        | 0        | 0        |
| ALDH3A2    | 0        | 0        | 0        | 0        | 0        | 0        | 0        | 0        |
| GLYCTK     | 0        | 0        | 0        | 0        | 0        | 0        | 0        | 0        |
| EAA_arg    | -0.04645 | -0.04645 | -0.04645 | -0.04645 | -0.04645 | -0.04645 | -0.06036 | -0.04645 |
| EAA_his    | -0.01601 | -0.01601 | -0.01601 | -0.01601 | -0.01601 | -0.01601 | -0.05085 | -0.01601 |
| EAA_ile    | -0.062   | -0.062   | -0.062   | -10      | -0.062   | -0.062   | -0.062   | -0.062   |
| EAA_leu    | -0.123   | -0.123   | -0.123   | -0.123   | -0.30084 | -0.123   | -0.123   | -0.123   |
| EAA_lys    | -0.08998 | -0.08998 | -0.08998 | -0.08998 | -0.08998 | -0.08998 | -0.16251 | -0.08998 |
| EAA_met    | -0.025   | -0.025   | -0.025   | -0.025   | -0.025   | -0.025   | -0.03249 | -0.025   |
| EAA_phe    | -0.02968 | -0.02968 | -0.02968 | -0.02968 | -0.02968 | -0.02968 | -0.03857 | -0.02968 |
| EAA_thr    | -0.04734 | -0.04734 | -0.04734 | -0.04734 | -0.04734 | -0.04734 | -0.06152 | -0.04734 |
| EAA_trp    | -0.00494 | -0.00494 | -0.00494 | -0.00494 | -0.00494 | -0.00494 | -0.00642 | -0.00494 |
| EAA_val    | -0.233   | -0.233   | -0.233   | -0.233   | -0.233   | -0.233   | -0.233   | -0.233   |
| NEAA_ala   | -0.333   | -0.333   | -0.333   | -0.333   | -0.333   | -0.333   | -0.333   | -0.333   |
| NEAA_asn   | 0.537158 | 0.537158 | 0.537158 | 0.537158 | 0.715003 | 0.537158 | -0.041   | 0.537158 |
| NEAA_asp   | -0.003   | -0.003   | -0.003   | -0.003   | -0.003   | -0.003   | -0.003   | -0.003   |
| NEAA_cys   | -0.01028 | -0.01028 | -0.01028 | -0.01028 | -0.01028 | -0.01028 | -0.01336 | -0.01028 |
| NEAA_glu   | -0.024   | -0.024   | -0.024   | -0.024   | -0.024   | -0.024   | -0.024   | -0.024   |
| NEAA_gln   | -0.586   | -0.586   | -0.586   | -0.586   | -0.586   | -0.586   | -0.586   | -0.586   |
| NEAA_gly   | -0.04715 | -0.04715 | -0.04715 | -0.04715 | -0.04715 | -0.04715 | -0.09131 | -0.04715 |
| NEAA_pro   | -0.168   | -0.168   | -0.168   | -0.168   | -0.168   | -0.168   | -0.168   | -0.168   |
| NEAA_ser   | 0.384843 | 0.384843 | 0.384843 | 10.32284 | 0.206998 | 0.384843 | 0.199317 | 0.384843 |
| NEAA_tyr   | -0.01738 | -0.01738 | -0.01738 | -0.01738 | -0.01738 | -0.01738 | -0.02258 | -0.01738 |
| DLDH       | 0.242956 | 0.242956 | 0.242956 | 10.18096 | 0.420801 | 0.242956 | 0.190544 | 0.242956 |
| MT_val     | 0.190796 | 0.190796 | 0.190796 | 0.190796 | 0.190796 | 0.190796 | 0.178159 | 0.190796 |
| BCAT2-val  | 0.190796 | 0.190796 | 0.190796 | 0.190796 | 0.190796 | 0.190796 | 0.178159 | 0.190796 |
| BCKDHB-val | 0.190796 | 0.190796 | 0.190796 | 0.190796 | 0.190796 | 0.190796 | 0.178159 | 0.190796 |
| BCKADE2-v  | 0.190796 | 0.190796 | 0.190796 | 0.190796 | 0.190796 | 0.190796 | 0.178159 | 0.190796 |
| ACADSB     | 0.190796 | 0.190796 | 0.190796 | 0.190796 | 0.190796 | 0.190796 | 0.178159 | 0.190796 |
| ECHS1      | 0.190796 | 0.190796 | 0.190796 | 0.190796 | 0.190796 | 0.190796 | 0.178159 | 0.190796 |
| HIBCH      | 0.190796 | 0.190796 | 0.190796 | 0.190796 | 0.190796 | 0.190796 | 0.178159 | 0.190796 |
| HIBADH     | 0.190796 | 0.190796 | 0.190796 | 0.190796 | 0.190796 | 0.190796 | 0.178159 | 0.190796 |
| ALDH6A1    | 0.190796 | 0.190796 | 0.190796 | 0.190796 | 0.190796 | 0.190796 | 0.178159 | 0.190796 |
| PCCB       | 0.205083 | 0.205083 | 0.205083 | 10.14308 | 0.205083 | 0.205083 | 0.178159 | 0.205083 |
| MCEE       | 0.205083 | 0.205083 | 0.205083 | 10.14308 | 0.205083 | 0.205083 | 0.178159 | 0.205083 |
| MUT        | 0.205083 | 0.205083 | 0.205083 | 10.14308 | 0.205083 | 0.205083 | 0.178159 | 0.205083 |
| MT_ile     | 0.014287 | 0.014287 | 0.014287 | 9.952287 | 0.014287 | 0.014287 | 0        | 0.014287 |
| BCAT-ile   | 0.014287 | 0.014287 | 0.014287 | 9.952287 | 0.014287 | 0.014287 | 0        | 0.014287 |
| BCKDHB-ile | 0.014287 | 0.014287 | 0.014287 | 9.952287 | 0.014287 | 0.014287 | 0        | 0.014287 |
| BCKADE2-il | 0.014287 | 0.014287 | 0.014287 | 9.952287 | 0.014287 | 0.014287 | 0        | 0.014287 |
| ECHS1      | 0.014287 | 0.014287 | 0.014287 | 9.952287 | 0.014287 | 0.014287 | 0        | 0.014287 |

|            |          |          |          |          |          |          |          |          |
|------------|----------|----------|----------|----------|----------|----------|----------|----------|
| HSD17B10   | 0.014287 | 0.014287 | 0.014287 | 9.952287 | 0.014287 | 0.014287 | 0        | 0.014287 |
| ACAT1      | 0.014287 | 0.014287 | 0.014287 | 9.952287 | 0.014287 | 0.014287 | 0        | 0.014287 |
| MT_leu     | 0.037874 | 0.037874 | 0.037874 | 0.037874 | 0.215719 | 0.037874 | 0.012385 | 0.037874 |
| BCAT2-leu  | 0.037874 | 0.037874 | 0.037874 | 0.037874 | 0.215719 | 0.037874 | 0.012385 | 0.037874 |
| BCKDHB-le  | 0.037874 | 0.037874 | 0.037874 | 0.037874 | 0.215719 | 0.037874 | 0.012385 | 0.037874 |
| BCKADE2-li | 0.037874 | 0.037874 | 0.037874 | 0.037874 | 0.215719 | 0.037874 | 0.012385 | 0.037874 |
| IVD        | 0.037874 | 0.037874 | 0.037874 | 0.037874 | 0.215719 | 0.037874 | 0.012385 | 0.037874 |
| MCC1,MCC   | 0.037874 | 0.037874 | 0.037874 | 0.037874 | 0.215719 | 0.037874 | 0.012385 | 0.037874 |
| MGCA       | 0.037874 | 0.037874 | 0.037874 | 0.037874 | 0.215719 | 0.037874 | 0.012385 | 0.037874 |
| HMGCL      | 0.037874 | 0.037874 | 0.037874 | 0.037874 | 0.215719 | 0.037874 | 0.012385 | 0.037874 |
| OXCT       | 0.037874 | 0.037874 | 0.037874 | 0.037874 | 0.215719 | 0.037874 | 0.012385 | 0.037874 |
| HMGCS2     | 0        | 0        | 0        | 0        | 0        | 0        | 0        | 0        |
| GluDeh     | 0.037874 | 0.037874 | 0.037874 | 0.037874 | 0.215719 | 0.037874 | 0.103545 | 0.037874 |
| GlnSynth   | 0.037874 | 0.037874 | 0.037874 | 0.037874 | 0.215719 | 0.037874 | 0.163639 | 0.037874 |
| GLN_Elim   | 0        | 0        | 0        | 0        | 0        | 0        | 0.677958 | 0        |
| ALT        | -0.25312 | -0.25312 | -0.25312 | -0.25312 | -0.25312 | -0.25312 | -0.2292  | -0.25312 |
| ALA_Elim   | 0        | 0        | 0        | 0        | 0        | 0        | 0        | 0        |
| SDS        | 0        | 0        | 0        | 0        | 0        | 0        | 0        | 0        |
| CBS        | 0        | 0        | 0        | 0        | 0        | 0        | 0        | 0        |
| CTH        | 0        | 0        | 0        | 0        | 0        | 0        | 0        | 0        |
| ILVBL      | 0        | 0        | 0        | 0        | 0        | 0        | 0        | 0        |
| 2a2hButLe: | 0        | 0        | 0        | 0        | 0        | 0        | 0        | 0        |
| MT_lys     | 0        | 0        | 0        | 0        | 0        | 0        | 0.04558  | 0        |
| AASS       | 0        | 0        | 0        | 0        | 0        | 0        | 0.04558  | 0        |
| AASS       | 0        | 0        | 0        | 0        | 0        | 0        | 0.04558  | 0        |
| aAASADeh   | 0        | 0        | 0        | 0        | 0        | 0        | 0.04558  | 0        |
| KATII      | 0        | 0        | 0        | 0        | 0        | 0        | 0.04558  | 0        |
| lysdeg     | 0        | 0        | 0        | 0        | 0        | 0        | 0.04558  | 0        |
| GCDH       | 0        | 0        | 0        | 0        | 0        | 0        | 0.04558  | 0        |
| MT_pro     | 0.139516 | 0.139516 | 0.139516 | 0.139516 | 0.139516 | 0.139516 | 0.130987 | 0.139516 |
| PRODH      | 12.87742 | 12.87742 | 12.87742 | 22.81542 | 13.41096 | 12.87742 | 0.350462 | 12.87742 |
| ALDH4a1    | 0.139516 | 0.139516 | 0.139516 | 0.139516 | 0.139516 | 0.139516 | 0.130987 | 0.139516 |
| GATM       | 0        | 0        | 0        | 0        | 0        | 0        | 0        | 0        |
| Dr_orn     | 0        | 0        | 0        | 0        | 0        | 0        | 0        | 0        |
| GAMT       | 0        | 0        | 0        | 0        | 0        | 0        | 0        | 0        |
| Dr_cr      | 0        | 0        | 0        | 0        | 0        | 0        | 0        | 0        |
| AdoHcyase  | 0        | 0        | 0        | 0        | 0        | 0        | 0        | 0        |
| MTR        | 0        | 0        | 0        | 0        | 0        | 0        | 0        | 0        |
| AdoMet     | 0        | 0        | 0        | 0        | 0        | 0        | 0        | 0        |
| SHMT       | 0        | 0        | 0        | 0        | 0        | 0        | -0.03005 | 0        |
| MTHFR      | 0        | 0        | 0        | 0        | 0        | 0        | 0        | 0        |
| DHFR       | 0        | 0        | 0        | 0        | 0        | 0        | 0        | 0        |
| HAL        | 0        | 0        | 0        | 0        | 0        | 0        | 0.030047 | 0        |
| FLJ31300   | 0        | 0        | 0        | 0        | 0        | 0        | 0.030047 | 0        |
| MGC35366   | 0        | 0        | 0        | 0        | 0        | 0        | 0.030047 | 0        |
| FTCD1      | 0        | 0        | 0        | 0        | 0        | 0        | 0.030047 | 0        |
| FTCD2      | 0        | 0        | 0        | 0        | 0        | 0        | 0.030047 | 0        |

|          |          |          |          |          |          |          |          |          |
|----------|----------|----------|----------|----------|----------|----------|----------|----------|
| FT       | 0        | 0        | 0        | 0        | 0        | 0        | 0.030047 | 0        |
| ASNase   | 0        | 0        | 0        | 0        | 0        | 0        | 0        | 0        |
| ASNSynth | 0.571827 | 0.571827 | 0.571827 | 0.571827 | 0.749672 | 0.571827 | 0.00405  | 0.571827 |
| PHGDH    | 0.430967 | 0.430967 | 0.430967 | 10.36897 | 0.253122 | 0.430967 | 0.229204 | 0.430967 |
| PSA      | 0.430967 | 0.430967 | 0.430967 | 10.36897 | 0.253122 | 0.430967 | 0.229204 | 0.430967 |
| PSPH     | 0.430967 | 0.430967 | 0.430967 | 10.36897 | 0.253122 | 0.430967 | 0.229204 | 0.430967 |
| P5CS     | 0        | 0        | 0        | 0        | 0        | 0        | 0        | 0        |
| PYCS     | 0        | 0        | 0        | 0        | 0        | 0        | 0        | 0        |
| Spont    | 0        | 0        | 0        | 0        | 0        | 0        | 0        | 0        |
| PYRCR1   | 12.73791 | 12.73791 | 12.73791 | 22.67591 | 13.27144 | 12.73791 | 0.219476 | 12.73791 |
| PAG      | 0        | 0        | 0        | 0        | 0        | 0        | 0        | 0        |
| PCBD     | 0        | 0        | 0        | 0        | 0        | 0        | 0        | 0        |
| QDPR     | 0        | 0        | 0        | 0        | 0        | 0        | 0        | 0        |
| MT_glu   | 0.344598 | 0.344598 | 0.344598 | 10.2826  | 0.344598 | 0.344598 | 0.309146 | 0.344598 |
| tRNA     | 1.22E-16 | 1.22E-16 | 8.68E-17 | 1.24E-16 | 4.28E-17 | 1.22E-16 | -1.5E-16 | 1.22E-16 |
| YARS     | 0.017378 | 0.017378 | 0.017378 | 0.017378 | 0.017378 | 0.017378 | 0.022581 | 0.017378 |
| WARS     | 0.004943 | 0.004943 | 0.004943 | 0.004943 | 0.004943 | 0.004943 | 0.006424 | 0.004943 |
| TARS     | 0.047343 | 0.047343 | 0.047343 | 0.047343 | 0.047343 | 0.047343 | 0.061519 | 0.047343 |
| LARS     | 0.085126 | 0.085126 | 0.085126 | 0.085126 | 0.085126 | 0.085126 | 0.110615 | 0.085126 |
| IARS     | 0.047713 | 0.047713 | 0.047713 | 0.047713 | 0.047713 | 0.047713 | 0.062    | 0.047713 |
| KARS     | 0.089983 | 0.089983 | 0.089983 | 0.089983 | 0.089983 | 0.089983 | 0.116926 | 0.089983 |
| AARS     | 0.079878 | 0.079878 | 0.079878 | 0.079878 | 0.079878 | 0.079878 | 0.103796 | 0.079878 |
| VARS     | 0.042204 | 0.042204 | 0.042204 | 0.042204 | 0.042204 | 0.042204 | 0.054841 | 0.042204 |
| MARS     | 0.025    | 0.025    | 0.025    | 0.025    | 0.025    | 0.025    | 0.032486 | 0.025    |
| SARS     | 0.046124 | 0.046124 | 0.046124 | 0.046124 | 0.046124 | 0.046124 | 0.059934 | 0.046124 |
| DARS     | 0.047082 | 0.047082 | 0.047082 | 0.047082 | 0.047082 | 0.047082 | 0.061179 | 0.047082 |
| GARS     | 0.047147 | 0.047147 | 0.047147 | 0.047147 | 0.047147 | 0.047147 | 0.061264 | 0.047147 |
| PARS     | 0.028484 | 0.028484 | 0.028484 | 0.028484 | 0.028484 | 0.028484 | 0.037013 | 0.028484 |
| CARS     | 0.010279 | 0.010279 | 0.010279 | 0.010279 | 0.010279 | 0.010279 | 0.013356 | 0.010279 |
| EPRS     | 0.108798 | 0.108798 | 0.108798 | 0.108798 | 0.108798 | 0.108798 | 0.141375 | 0.108798 |
| QARS     | 0.052047 | 0.052047 | 0.052047 | 0.052047 | 0.052047 | 0.052047 | 0.067631 | 0.052047 |
| RARS     | 0.04645  | 0.04645  | 0.04645  | 0.04645  | 0.04645  | 0.04645  | 0.060359 | 0.04645  |
| FARS     | 0.029682 | 0.029682 | 0.029682 | 0.029682 | 0.029682 | 0.029682 | 0.03857  | 0.029682 |
| HARS     | 0.016006 | 0.016006 | 0.016006 | 0.016006 | 0.016006 | 0.016006 | 0.020799 | 0.016006 |
| NARS     | 0.034669 | 0.034669 | 0.034669 | 0.034669 | 0.034669 | 0.034669 | 0.04505  | 0.034669 |
| ACT      | 0.000152 | 0.000152 | 0.000152 | 0.000152 | 0.000152 | 0.000152 | 0.000198 | 0.000152 |
| MYOHC1-2 | 0        | 0        | 0        | 0        | 0        | 0        | 0        | 0        |
| MYOHC2a  | 0.000305 | 0.000305 | 0.000305 | 0.000305 | 0.000305 | 0.000305 | 0.000396 | 0.000305 |
| MYOHC2b  | 0        | 0        | 0        | 0        | 0        | 0        | 0        | 0        |
| MYOLCk   | 0.000305 | 0.000305 | 0.000305 | 0.000305 | 0.000305 | 0.000305 | 0.000396 | 0.000305 |
| MYOLCp   | 0.000305 | 0.000305 | 0.000305 | 0.000305 | 0.000305 | 0.000305 | 0.000396 | 0.000305 |
| MYO1-2x  | 0        | 0        | 0        | 0        | 0        | 0        | 0        | 0        |
| MYO2a    | 0.000152 | 0.000152 | 0.000152 | 0.000152 | 0.000152 | 0.000152 | 0.000198 | 0.000152 |
| MYO2x    | 0        | 0        | 0        | 0        | 0        | 0        | 0        | 0        |
| MYO2b    | 0        | 0        | 0        | 0        | 0        | 0        | 0        | 0        |
| TMN1     | 0        | 0        | 0        | 0        | 0        | 0        | 0        | 0        |
| TMN2     | 4.36E-05 | 4.36E-05 | 4.36E-05 | 4.36E-05 | 4.36E-05 | 4.36E-05 | 5.66E-05 | 4.36E-05 |

|             |          |          |          |          |          |          |          |          |
|-------------|----------|----------|----------|----------|----------|----------|----------|----------|
| DIM-TMN1    | 0        | 0        | 0        | 0        | 0        | 0        | 0        | 0        |
| DIM-TMN2    | 2.18E-05 | 2.18E-05 | 2.18E-05 | 2.18E-05 | 2.18E-05 | 2.18E-05 | 2.83E-05 | 2.18E-05 |
| TPNC1       | 0        | 0        | 0        | 0        | 0        | 0        | 0        | 0        |
| TPNC2       | 2.18E-05 | 2.18E-05 | 2.18E-05 | 2.18E-05 | 2.18E-05 | 2.18E-05 | 2.83E-05 | 2.18E-05 |
| TPNI1       | 0        | 0        | 0        | 0        | 0        | 0        | 0        | 0        |
| TPNI2       | 2.18E-05 | 2.18E-05 | 2.18E-05 | 2.18E-05 | 2.18E-05 | 2.18E-05 | 2.83E-05 | 2.18E-05 |
| TPNT1       | 0        | 0        | 0        | 0        | 0        | 0        | 0        | 0        |
| TPNT2       | 2.18E-05 | 2.18E-05 | 2.18E-05 | 2.18E-05 | 2.18E-05 | 2.18E-05 | 2.83E-05 | 2.18E-05 |
| TPN1        | 0        | 0        | 0        | 0        | 0        | 0        | 0        | 0        |
| TPN2        | 2.18E-05 | 2.18E-05 | 2.18E-05 | 2.18E-05 | 2.18E-05 | 2.18E-05 | 2.83E-05 | 2.18E-05 |
| CONTR-CO    | 0        | 0        | 0        | 0        | 0        | 0        | 0        | 0        |
| CONTR-CO    | 2.18E-05 | 2.18E-05 | 2.18E-05 | 2.18E-05 | 2.18E-05 | 2.18E-05 | 2.83E-05 | 2.18E-05 |
| CONTR-CO    | 0        | 0        | 0        | 0        | 0        | 0        | 0        | 0        |
| CONTR-CO    | 0        | 0        | 0        | 0        | 0        | 0        | 0        | 0        |
| Str_CONTR   | 0        | 0        | 0        | 0        | 0        | 0        | 0        | 0        |
| Str_CONTR   | 2.18E-05 | 2.18E-05 | 2.18E-05 | 2.18E-05 | 2.18E-05 | 2.18E-05 | 2.83E-05 | 2.18E-05 |
| Str_CONTR   | 0        | 0        | 0        | 0        | 0        | 0        | 0        | 0        |
| Str_CONTR   | 0        | 0        | 0        | 0        | 0        | 0        | 0        | 0        |
| CKM         | -227.568 | -227.568 | -227.568 | -476.018 | -231.48  | -227.568 | -2.19138 | -227.568 |
| Spont       | 227.5677 | 227.5677 | 227.5677 | 476.0177 | 231.4802 | 227.5677 | 2.191377 | 227.5677 |
| Nut_cr      | 0        | 0        | 0        | 0        | 0        | 0        | 6.99E-17 | 0        |
| ATP2UTP     | 0        | 0        | 0        | 0        | 0        | 0        | 0        | 0        |
| UDP2ADP     | 0        | 0        | 0        | 0        | 0        | 0        | 0        | 0        |
| PGM1        | 0        | 0        | 0        | 0        | 0        | 0        | 0        | 0        |
| UGP2        | 0        | 0        | 0        | 0        | 0        | 0        | 0        | 0        |
| mGYG        | 0        | 0        | 0        | 0        | 0        | 0        | 0        | 0        |
| mGYS1       | 0        | 0        | 0        | 0        | 0        | 0        | 0        | 0        |
| G6PD        | 0.000005 | 0.000005 | 0.000005 | 0.000005 | 0.000005 | 0.000005 | 0        | 0.000005 |
| PGLS        | 0.000005 | 0.000005 | 0.000005 | 0.000005 | 0.000005 | 0.000005 | 0        | 0.000005 |
| PGD         | -5E-06   | -5E-06   | -5E-06   | -5E-06   | -5E-06   | -5E-06   | 0        | -5E-06   |
| PGD         | 0.00001  | 0.00001  | 0.00001  | 0.00001  | 0.00001  | 0.00001  | 0        | 0.00001  |
| RPE         | 3.33E-06 | 3.33E-06 | 3.33E-06 | 3.33E-06 | 3.33E-06 | 3.33E-06 | 0        | 3.33E-06 |
| RPIA        | 1.67E-06 | 1.67E-06 | 1.67E-06 | 1.67E-06 | 1.67E-06 | 1.67E-06 | 0        | 1.67E-06 |
| TKT1        | 1.67E-06 | 1.67E-06 | 1.67E-06 | 1.67E-06 | 1.67E-06 | 1.67E-06 | 0        | 1.67E-06 |
| TKT2        | -1.7E-06 | -1.7E-06 | -1.7E-06 | -1.7E-06 | -1.7E-06 | -1.7E-06 | 0        | -1.7E-06 |
| TALDO       | 1.67E-06 | 1.67E-06 | 1.67E-06 | 1.67E-06 | 1.67E-06 | 1.67E-06 | 0        | 1.67E-06 |
| RBSK        | 0        | 0        | 0        | 0        | 0        | 0        | 0        | 0        |
| GCL         | 0        | 0        | 0        | 0        | 0        | 0        | 0        | 0        |
| GSS         | 0        | 0        | 0        | 0        | 0        | 0        | 0        | 0        |
| glutathxpo  | 0        | 0        | 0        | 0        | 0        | 0        | 0        | 0        |
| GSR         | 0        | 0        | 0        | 0        | 0        | 0        | 0        | 0        |
| GSR         | 0        | 0        | 0        | 0        | 0        | 0        | 0        | 0        |
| GlutathLea  | 0        | 0        | 0        | 0        | 0        | 0        | 0        | 0        |
| GlutathLea  | 0        | 0        | 0        | 0        | 0        | 0        | 0        | 0        |
| Recycle_na  | 0        | 0        | 0        | 0        | 0        | 0        | 0        | 0        |
| fa-c6 leak  | 0        | 0        | 0        | 0        | 0        | 0        | 0        | 0        |
| acetyLeak(i | 0.037874 | 0.037874 | 0.037874 | 0.037874 | 0.215719 | 0.037874 | 0.012385 | 0.037874 |

0 0 0 0 0 0 0 0



|          |          |          |          |          |          |          |          |          |
|----------|----------|----------|----------|----------|----------|----------|----------|----------|
| 0        | 0        | 0        | 0        | 0        | 0        | 0        | 0        | 0        |
| 0        | 0        | 0        | 0        | 0        | 0        | 0        | 0        | 0        |
| 0.23     | 0.23     | 0.23     | 0.23     | 0.23     | 0.23     | 0.23     | 0.23     | 0.23     |
| 0        | 0        | 0        | 0        | 0        | 0        | 0        | 0        | 0        |
| 0        | 0        | 0        | 0        | 0        | 0        | 0        | 0        | 0        |
| 0.23     | 0.23     | 0.23     | 0.23     | 0.23     | 0.23     | 0.23     | 0.23     | 0.23     |
| 0        | 0        | 0        | 0        | 0        | 0        | 0        | 0        | 0        |
| 0        | 0        | 0        | 0        | 0        | 0        | 0        | 0        | 0        |
| 0        | 0        | 0        | 0        | 0        | 0        | 0        | 0        | 0        |
| 0        | 0        | 0        | 0        | 0        | 0        | 0        | 0        | 0        |
| 5        | 5        | 5        | 5        | 5        | 5        | 5        | 5        | 5        |
| 4.999995 | 4.999995 | 5        | 4.999995 | 4.999995 | 5        | 4.999995 | 4.999995 | 4.999995 |
| 4.999998 | 4.999998 | 5        | 4.999998 | 4.999998 | 5        | 4.999998 | 4.999998 | 4.999998 |
| 0        | 0        | 0        | 0        | 0        | 0        | 0        | 0        | 0        |
| 4.999998 | 4.999998 | 5        | 4.999998 | 4.999998 | 5        | 4.999998 | 4.999998 | 4.999998 |
| -5       | -5       | -5       | -5       | -5       | -5       | -5       | -5       | -5       |
| 9.999998 | 9.999998 | 10       | 9.999998 | 9.999998 | 10       | 9.999998 | 9.999998 | 9.999998 |
| 9.999998 | 9.999998 | 10       | 9.999998 | 9.999998 | 10       | 9.999998 | 9.999998 | 9.999998 |
| 9.569031 | 9.569031 | -0.19797 | -0.09797 | 9.569031 | -0.42797 | 9.569031 | -0.40697 | 9.569031 |
| 9.569031 | 9.569031 | -0.19797 | -0.09797 | 9.569031 | -0.42797 | 9.569031 | -0.40697 | 9.569031 |
| 9.746876 | 9.746876 | 9.746878 | 0.079876 | 9.746876 | 9.746878 | 9.746876 | 9.746876 | 9.746876 |
| 0        | 0        | 0        | 0        | 0        | 0        | 0        | 0        | 0        |
| 0        | 0        | 0        | 0        | 0        | 0        | 0        | 0        | 0        |
| 0.177845 | 0.177845 | 9.944845 | 0.177845 | 0.177845 | 10.17484 | 0.177845 | 10.15384 | 0.177845 |
| 0        | 0        | 0        | 0        | 0        | 0        | 0        | 0        | 0        |
| 10.43098 | 10.43098 | 20.19797 | 20.09798 | 10.43098 | 20.42797 | 10.43098 | 20.40698 | 10.43098 |
| 10.60882 | 10.60882 | 30.14281 | 20.27582 | 10.60882 | 30.60281 | 10.60882 | 30.56082 | 10.60882 |
| 0        | 0        | 0        | 0        | 0        | 0        | 0        | 0        | 0        |
| 10.43098 | 10.43098 | 20.19797 | 20.09798 | 10.43098 | 20.42797 | 10.43098 | 20.40698 | 10.43098 |
| 11.22473 | 11.22473 | 30.75872 | 20.89173 | 11.22473 | 21.22172 | 11.22473 | 31.17673 | 20.63873 |
| 9.999998 | 9.999998 | 10       | 9.999998 | 9.999998 | 10       | 9.999998 | 9.999998 | 9.999998 |
| 11.22473 | 11.22473 | 30.75872 | 20.89173 | 11.22473 | 21.22172 | 11.22473 | 31.17673 | 20.63873 |
| 0        | 0        | 0        | 0        | 0        | 0        | 0        | 0        | 0        |
| 9.999998 | 9.999998 | 10       | 9.999998 | 9.999998 | 10       | 9.999998 | 9.999998 | 9.999998 |
| 12.70003 | 12.70003 | 12.70003 | 12.70003 | 12.70003 | 12.70003 | 12.70003 | 12.70003 | 12.70003 |
| 12.70003 | 12.70003 | 12.70003 | 12.70003 | 12.70003 | 12.70003 | 12.70003 | 12.70003 | 12.70003 |
| 0        | 0        | 0        | 0        | 0        | 0        | 0        | 0        | 0        |
| 12.70003 | 12.70003 | 12.70003 | 12.70003 | 12.70003 | 12.70003 | 12.70003 | 12.70003 | 12.70003 |
| 13.2887  | 13.2887  | 13.2887  | 13.2887  | 13.2887  | 13.2887  | 13.2887  | 23.2647  | 22.7027  |
| 13.45591 | 13.45591 | 23.22291 | 13.45591 | 13.45591 | 13.45591 | 13.45591 | 23.43191 | 22.86991 |
| 13.49379 | 13.49379 | 23.26079 | 13.49379 | 13.49379 | 13.49379 | 13.49379 | 23.46979 | 22.90779 |
| 13.49379 | 13.49379 | 23.26079 | 13.49379 | 13.49379 | 13.49379 | 13.49379 | 23.46979 | 22.90779 |
| 23.92476 | 23.92476 | 43.45875 | 33.59176 | 23.92476 | 33.92175 | 23.92476 | 43.87676 | 33.33876 |
| 49.89181 | 49.89181 | 98.72681 | 59.55881 | 49.89181 | 59.88881 | 49.89181 | 79.81981 | 68.71981 |
| 28.85488 | 28.85488 | 48.38888 | 28.85488 | 28.85488 | 28.85488 | 28.85488 | 38.83088 | 38.26888 |
| 78.74669 | 78.74669 | 147.1157 | 88.41369 | 78.74669 | 88.74369 | 78.74669 | 118.6507 | 106.9887 |
| 39.37335 | 39.37335 | 73.55785 | 44.20685 | 39.37335 | 44.37185 | 39.37335 | 59.32535 | 53.49435 |















0 0 0 0 0 0 0 0 0





|          |          |          |          |
|----------|----------|----------|----------|
| 0        | 0        | 0        | 0        |
| 0        | 0        | 0        | 0        |
| 0.23     | 0.23     | 0.23     | 0.23     |
| 0        | 0        | 0        | 0        |
| 0        | 0        | 0        | 0        |
| 0.23     | 0.23     | 0.23     | 0.23     |
| 0        | 0        | 0        | 0        |
| 0        | 0        | 0        | 0        |
| 0        | 0        | 0        | 0        |
| 0        | 0        | 0        | 0        |
| 5        | 5        | 5        | 5        |
| 4.999995 | 4.999995 | 4.999995 | 4.999995 |
| 4.999998 | 4.999998 | 4.999998 | 4.999998 |
| 0        | 0        | 0        | 0        |
| 4.999998 | 4.999998 | 4.999998 | 4.999998 |
| -5       | -5       | -5       | -5       |
| 9.999998 | 9.999998 | 9.999998 | 9.999998 |
| 9.999998 | 9.999998 | 9.999998 | 9.999998 |
| 9.569031 | -0.26297 | 9.569031 | 9.569031 |
| 9.569031 | -0.26297 | 9.569031 | 9.569031 |
| 9.746876 | 9.746876 | 9.746876 | 9.746876 |
| 0        | 0        | 0        | 0        |
| 0        | 0        | 0        | 0        |
| 0.177845 | 10.00984 | 0.177845 | 0.177845 |
| 0        | 0        | 0        | 0        |
| 10.43098 | 20.26298 | 10.43098 | 10.43098 |
| 10.60882 | 30.27282 | 10.60882 | 10.60882 |
| 0        | 0        | 0        | 0        |
| 10.43098 | 20.26298 | 10.43098 | 10.43098 |
| 11.22473 | 30.88873 | 11.22473 | 11.22473 |
| 9.999998 | 9.999998 | 9.999998 | 9.999998 |
| 11.22473 | 30.88873 | 11.22473 | 11.22473 |
| 0        | 0        | 0        | 0        |
| 9.999998 | 9.999998 | 9.999998 | 9.999998 |
| 12.70003 | 12.70003 | 12.70003 | 12.70003 |
| 12.70003 | 12.70003 | 12.70003 | 12.70003 |
| 0        | 0        | 0        | 0        |
| 12.70003 | 12.70003 | 12.70003 | 12.70003 |
| 13.2887  | 23.1207  | 13.2887  | 13.2887  |
| 13.45591 | 23.28791 | 13.45591 | 13.45591 |
| 13.49379 | 23.32579 | 13.49379 | 13.49379 |
| 13.49379 | 23.32579 | 13.49379 | 13.49379 |
| 23.92476 | 43.58876 | 23.92476 | 23.92476 |
| 49.89181 | 89.21981 | 49.89181 | 49.89181 |
| 28.85488 | 48.51888 | 28.85488 | 28.85488 |
| 78.74669 | 137.7387 | 78.74669 | 78.74669 |
| 39.37335 | 68.86935 | 39.37335 | 39.37335 |

|          |          |          |          |
|----------|----------|----------|----------|
| 207.3852 | 364.6972 | 207.3852 | 207.3852 |
| 1.603164 | 1.603164 | 1.603164 | 1.603164 |
| 0.125    | 0.125    | 0.125    | 0.125    |
| 0.125    | 0.125    | 0.125    | 0.125    |
| 0.125    | 0.125    | 0.125    | 0.125    |
| 0.125    | 0.125    | 0.125    | 0.125    |
| 0        | 0        | 0        | 0        |
| 0        | 0        | 0        | 0        |
| 0        | 0        | 0        | 0        |
| 0        | 0        | 0        | 0        |
| 0.125    | 0.125    | 0.125    | 0.125    |
| 0.125    | 0.125    | 0.125    | 0.125    |
| 0.125    | 0.125    | 0.125    | 0.125    |
| 0.125    | 0.125    | 0.125    | 0.125    |
| 0        | 0        | 0        | 0        |
| 0        | 0        | 0        | 0        |
| 0        | 0        | 0        | 0        |
| 0        | 0        | 0        | 0        |
| 0.355    | 0.355    | 0.355    | 0.355    |
| 0.355    | 0.355    | 0.355    | 0.355    |
| 0.355    | 0.355    | 0.355    | 0.355    |
| 0.355    | 0.355    | 0.355    | 0.355    |
| 0.355    | 0.355    | 0.355    | 0.355    |
| 0.355    | 0.355    | 0.355    | 0.355    |
| 0.355    | 0.355    | 0.355    | 0.355    |
| 0.355    | 0.355    | 0.355    | 0.355    |
| 0.355    | 0.355    | 0.355    | 0.355    |
| 0.355    | 0.355    | 0.355    | 0.355    |
| 0.355    | 0.355    | 0.355    | 0.355    |
| 0.355    | 0.355    | 0.355    | 0.355    |
| 0.355    | 0.355    | 0.355    | 0.355    |
| 0.355    | 0.355    | 0.355    | 0.355    |
| 0.355    | 0.355    | 0.355    | 0.355    |
| 0.355    | 0.355    | 0.355    | 0.355    |
| 0.355    | 0.355    | 0.355    | 0.355    |
| 0.355    | 0.355    | 0.355    | 0.355    |
| 0.355    | 0.355    | 0.355    | 0.355    |
| 0.355    | 0.355    | 0.355    | 0.355    |
| 0.355    | 0.355    | 0.355    | 0.355    |
| 0.355    | 0.355    | 0.355    | 0.355    |
| 0.355    | 0.355    | 0.355    | 0.355    |
| 0.355    | 0.355    | 0.355    | 0.355    |
| 0.392874 | 0.392874 | 0.392874 | 0.392874 |
| 0        | 0        | 0        | 0        |
| 0        | 0        | 0        | 0        |
| 0        | 0        | 0        | 0        |
| 0        | 0        | 0        | 0        |
| 0        | 0        | 0        | 0        |







|          |          |          |          |
|----------|----------|----------|----------|
| 0        | 0        | 0        | 0        |
| 0        | 0        | 0        | 0        |
| 0.571827 | 0.571827 | 0.571827 | 0.571827 |
| 0.430967 | 10.26297 | 0.430967 | 0.430967 |
| 0.430967 | 10.26297 | 0.430967 | 0.430967 |
| 0.430967 | 10.26297 | 0.430967 | 0.430967 |
| 0        | 0        | 0        | 0        |
| 0        | 0        | 0        | 0        |
| 0        | 0        | 0        | 0        |
| 12.73791 | 12.73791 | 12.73791 | 12.73791 |
| 0        | 0        | 0        | 0        |
| 0        | 0        | 0        | 0        |
| 0        | 0        | 0        | 0        |
| 0.344598 | 10.1766  | 0.344598 | 0.344598 |
| 1.22E-16 | 9E-17    | 1.22E-16 | 1.22E-16 |
| 0.017378 | 0.017378 | 0.017378 | 0.017378 |
| 0.004943 | 0.004943 | 0.004943 | 0.004943 |
| 0.047343 | 0.047343 | 0.047343 | 0.047343 |
| 0.085126 | 0.085126 | 0.085126 | 0.085126 |
| 0.047713 | 0.047713 | 0.047713 | 0.047713 |
| 0.089983 | 0.089983 | 0.089983 | 0.089983 |
| 0.079878 | 0.079878 | 0.079878 | 0.079878 |
| 0.042204 | 0.042204 | 0.042204 | 0.042204 |
| 0.025    | 0.025    | 0.025    | 0.025    |
| 0.046124 | 0.046124 | 0.046124 | 0.046124 |
| 0.047082 | 0.047082 | 0.047082 | 0.047082 |
| 0.047147 | 0.047147 | 0.047147 | 0.047147 |
| 0.028484 | 0.028484 | 0.028484 | 0.028484 |
| 0.010279 | 0.010279 | 0.010279 | 0.010279 |
| 0.108798 | 0.108798 | 0.108798 | 0.108798 |
| 0.052047 | 0.052047 | 0.052047 | 0.052047 |
| 0.04645  | 0.04645  | 0.04645  | 0.04645  |
| 0.029682 | 0.029682 | 0.029682 | 0.029682 |
| 0.016006 | 0.016006 | 0.016006 | 0.016006 |
| 0.034669 | 0.034669 | 0.034669 | 0.034669 |
| 0.000152 | 0.000152 | 0.000152 | 0.000152 |
| 0        | 0        | 0        | 0        |
| 0.000305 | 0.000305 | 0.000305 | 0.000305 |
| 0        | 0        | 0        | 0        |
| 0.000305 | 0.000305 | 0.000305 | 0.000305 |
| 0.000305 | 0.000305 | 0.000305 | 0.000305 |
| 0        | 0        | 0        | 0        |
| 0.000152 | 0.000152 | 0.000152 | 0.000152 |
| 0        | 0        | 0        | 0        |
| 0        | 0        | 0        | 0        |
| 0        | 0        | 0        | 0        |
| 4.36E-05 | 4.36E-05 | 4.36E-05 | 4.36E-05 |

|          |          |          |          |
|----------|----------|----------|----------|
| 0        | 0        | 0        | 0        |
| 2.18E-05 | 2.18E-05 | 2.18E-05 | 2.18E-05 |
| 0        | 0        | 0        | 0        |
| 2.18E-05 | 2.18E-05 | 2.18E-05 | 2.18E-05 |
| 0        | 0        | 0        | 0        |
| 2.18E-05 | 2.18E-05 | 2.18E-05 | 2.18E-05 |
| 0        | 0        | 0        | 0        |
| 2.18E-05 | 2.18E-05 | 2.18E-05 | 2.18E-05 |
| 0        | 0        | 0        | 0        |
| 2.18E-05 | 2.18E-05 | 2.18E-05 | 2.18E-05 |
| 0        | 0        | 0        | 0        |
| 2.18E-05 | 2.18E-05 | 2.18E-05 | 2.18E-05 |
| 0        | 0        | 0        | 0        |
| 0        | 0        | 0        | 0        |
| 0        | 0        | 0        | 0        |
| 2.18E-05 | 2.18E-05 | 2.18E-05 | 2.18E-05 |
| 0        | 0        | 0        | 0        |
| 0        | 0        | 0        | 0        |
| -227.568 | -394.712 | -227.568 | -227.568 |
| 227.5677 | 394.7117 | 227.5677 | 227.5677 |
| 0        | 0        | 0        | 0        |
| 0        | 0        | 0        | 0        |
| 0        | 0        | 0        | 0        |
| 0        | 0        | 0        | 0        |
| 0        | 0        | 0        | 0        |
| 0        | 0        | 0        | 0        |
| 0        | 0        | 0        | 0        |
| 0.000005 | 0.000005 | 0.000005 | 0.000005 |
| 0.000005 | 0.000005 | 0.000005 | 0.000005 |
| -5E-06   | -5E-06   | -5E-06   | -5E-06   |
| 0.00001  | 0.00001  | 0.00001  | 0.00001  |
| 3.33E-06 | 3.33E-06 | 3.33E-06 | 3.33E-06 |
| 1.67E-06 | 1.67E-06 | 1.67E-06 | 1.67E-06 |
| 1.67E-06 | 1.67E-06 | 1.67E-06 | 1.67E-06 |
| -1.7E-06 | -1.7E-06 | -1.7E-06 | -1.7E-06 |
| 1.67E-06 | 1.67E-06 | 1.67E-06 | 1.67E-06 |
| 0        | 0        | 0        | 0        |
| 0        | 0        | 0        | 0        |
| 0        | 0        | 0        | 0        |
| 0        | 0        | 0        | 0        |
| 0        | 0        | 0        | 0        |
| 0        | 0        | 0        | 0        |
| 0        | 0        | 0        | 0        |
| 0        | 0        | 0        | 0        |
| 0        | 0        | 0        | 0        |
| 0        | 0        | 0        | 0        |
| 0.037874 | 0.037874 | 0.037874 | 0.037874 |

0

0

0

0





|            |          |          |          |          |          |          |          |          |
|------------|----------|----------|----------|----------|----------|----------|----------|----------|
| FAT10c     | 0        | 0        | 0        | 0        | 0        | 0        | 0        | 0        |
| FAT12c     | 0        | 0        | 0        | 0        | 0        | 0        | 0        | 0        |
| FAT14c     | 0.23     | 0.23     | 0.23     | 0        | 0.23     | 0.23     | 0        | 0.23     |
| FAT18c     | 0        | 0        | 0        | 0        | 0        | 0        | 0        | 0        |
| Alc_glyc   | 0        | 0        | 0        | 0        | 0        | 0        | 0        | 0        |
| COA        | 0.23     | 0.23     | 0.23     | 0        | 0.23     | 0.23     | 0        | 0.23     |
| SLC22A5/O  | 0        | 0        | 0        | 0        | 0        | 0        | 0        | 0        |
| Xport_rib  | 0        | 0        | 0        | 0        | 0        | 0        | 0        | 0        |
| Dr_akg     | 0        | 0        | 0        | 9.99999  | 0        | 0        | 0        | 0        |
| Dr_oaa     | 0        | 0        | 0        | 0        | 0        | 0        | 0        | 0        |
| Hex        | 5        | 5        | 5        | 5        | 5        | 5        | -1.9E-18 | 5        |
| PGI        | 4.999995 | 4.999995 | 5        | 5        | 4.999995 | 4.999995 | -1.9E-18 | 4.999995 |
| PFK        | 4.999998 | 4.999998 | 5        | 5        | 4.999998 | 4.999998 | -1.9E-18 | 4.999998 |
| FBP        | 0        | 0        | 0        | 0        | 0        | 0        | 0        | 0        |
| Ald        | 4.999998 | 4.999998 | 5        | 5        | 4.999998 | 4.999998 | -1.9E-18 | 4.999998 |
| TPI        | -5       | -5       | -5       | -5       | -5       | -5       | 1.88E-18 | -5       |
| D3PDeh     | 9.999998 | 9.999998 | 10       | 10       | 9.999998 | 9.999998 | -3.8E-18 | 9.999998 |
| PGK        | 9.999998 | 9.999998 | 10       | 10       | 9.999998 | 9.999998 | -3.8E-18 | 9.999998 |
| PGM        | 9.569031 | 9.569031 | 9.746878 | -39992.2 | 9.746876 | 9.569031 | -0.2292  | 9.569031 |
| Eno        | 9.569031 | 9.569031 | 9.746878 | -39992.2 | 9.746876 | 9.569031 | -0.2292  | 9.569031 |
| PyrK       | 9.746876 | 9.746876 | 9.746878 | 279994.6 | 9.746876 | 9.746876 | 0        | 999999   |
| PEPSynth   | 0        | 0        | 0        | 279994.9 | 0        | 0        | 0.229204 | 999989.3 |
| PEPCarbK   | 0        | 0        | 0        | 0        | 0        | 0        | 0        | 0        |
| PEPCarbl   | 0.177845 | 0.177845 | 0        | 39991.94 | 0        | 0.177845 | 0        | 0.177845 |
| LacDeh     | 0        | 0        | 0        | 0        | 0        | 0        | 0        | 0        |
| MalDehC(n  | 10.43098 | 10.43098 | 10.25312 | 40012.19 | 10.25313 | 10.43098 | 0.199158 | 10.43098 |
| ASTC       | 10.60882 | 10.60882 | 10.25312 | 80004.14 | 10.25313 | 10.60882 | 0.199158 | 10.60882 |
| G3PDehC    | 0        | 0        | 0        | 0        | 0        | 0        | 0        | 0        |
| Mal-AKGEX  | 10.43098 | 10.43098 | 10.25312 | 40012.19 | 10.25313 | 10.43098 | 0.199158 | 10.43098 |
| Glu-AspEx  | 11.22473 | 11.22473 | 11.04688 | 80004.17 | 11.04688 | 11.22473 | 0.261387 | 11.22473 |
| MCT        | 9.999998 | 9.999998 | 10       | 0        | 9.999998 | 9.999998 | 0        | 9.999998 |
| ASTM       | 11.22473 | 11.22473 | 11.04688 | 80004.17 | 11.04688 | 11.22473 | 0.261387 | 11.22473 |
| G3PDehM    | 0        | 0        | 0        | 0        | 0        | 0        | 0        | 0        |
| PyrSynth/P | 9.999998 | 9.999998 | 10       | 0        | 9.999998 | 9.999998 | 0        | 9.999998 |
| CitSynth   | 12.70003 | 12.70003 | 12.87788 | 40001.74 | 13.05572 | 12.70003 | 0.11593  | 12.70003 |
| Acon       | 12.70003 | 12.70003 | 12.87788 | 40001.74 | 13.05572 | 12.70003 | 0.11593  | 12.70003 |
| IsoDeh     | 0        | 0        | 0        | 40001.74 | 0        | 0        | 0        | 0        |
| IsoDehnadj | 12.70003 | 12.70003 | 12.87788 | 0        | 13.05572 | 12.70003 | 0.11593  | 12.70003 |
| AKGDeh     | 13.2887  | 13.2887  | 13.46655 | 39991.79 | 13.64439 | 13.2887  | 0        | 13.2887  |
| SunCoaSyn  | 13.45591 | 13.45591 | 13.63376 | 79993.72 | 13.63376 | 13.45591 | 0.165775 | 13.45591 |
| SucDeh(I)  | 13.49379 | 13.49379 | 13.67163 | 79993.72 | 13.84948 | 13.49379 | 0.178159 | 13.49379 |
| Fum        | 13.49379 | 13.49379 | 13.67163 | 79993.72 | 13.84948 | 13.49379 | 0.178159 | 13.49379 |
| MalDehM    | 23.92476 | 23.92476 | 23.92475 | 120005.9 | 24.10261 | 23.92476 | 0.377317 | 23.92476 |
| NADHDeh(   | 49.89181 | 49.89181 | 50.2475  | 280003.6 | 50.60319 | 49.89181 | 1.146327 | 49.89181 |
| ETFUO      | 28.85488 | 28.85488 | 29.47734 | 79994.05 | 29.92195 | 28.85488 | 0.764746 | 28.85488 |
| UCytC(III) | 78.74669 | 78.74669 | 79.72484 | 359997.7 | 80.52514 | 78.74669 | 1.911073 | 78.74669 |
| CytCO(IV)  | 39.37335 | 39.37335 | 39.86242 | 179998.8 | 40.26257 | 39.37335 | 0.955537 | 39.37335 |

|             |          |          |          |          |          |          |          |          |
|-------------|----------|----------|----------|----------|----------|----------|----------|----------|
| ATPSynth(\  | 207.3852 | 207.3852 | 209.6972 | 999999   | 211.6535 | 207.3852 | 4.968474 | 207.3852 |
| AMP_ADPs    | 1.603164 | 1.603164 | 1.781009 | 299990.7 | 1.781009 | 1.603164 | 1.410971 | 999990.9 |
| PalTK       | 0.125    | 0.125    | 0.125    | 0        | 0.125    | 0.125    | 0        | 0.125    |
| CPT1B/CHK   | 0.125    | 0.125    | 0.125    | 0        | 0.125    | 0.125    | 0        | 0.125    |
| SLC25A20/   | 0.125    | 0.125    | 0.125    | 0        | 0.125    | 0.125    | 0        | 0.125    |
| CPT2        | 0.125    | 0.125    | 0.125    | 0        | 0.125    | 0.125    | 0        | 0.125    |
| CRAT(mit)   | 0        | 0        | 0        | 0        | 0        | 0        | 0        | 0        |
| CRAT Trans  | 0        | 0        | 0        | 0        | 0        | 0        | 0        | 0        |
| CRAT(cyt)   | 0        | 0        | 0        | 0        | 0        | 0        | 0        | 0        |
| Acetyl-coal | 0        | 0        | 0        | 0        | 0        | 0        | 0        | 0        |
| AcylCoADe   | 0.125    | 0.125    | 0.125    | 0        | 0.125    | 0.125    | 0        | 0.125    |
| EnoCoADel   | 0.125    | 0.125    | 0.125    | 0        | 0.125    | 0.125    | 0        | 0.125    |
| 3HA-CoADe   | 0.125    | 0.125    | 0.125    | 0        | 0.125    | 0.125    | 0        | 0.125    |
| AcylCoAAT   | 0.125    | 0.125    | 0.125    | 0        | 0.125    | 0.125    | 0        | 0.125    |
| AcylCoADe   | 0        | 0        | 0        | 0        | 0        | 0        | 0        | 0        |
| EnoCoADel   | 0        | 0        | 0        | 0        | 0        | 0        | 0        | 0        |
| 3HA-CoADe   | 0        | 0        | 0        | 0        | 0        | 0        | 0        | 0        |
| AcylCoAAT   | 0        | 0        | 0        | 0        | 0        | 0        | 0        | 0        |
| AcylCoADe   | 0.355    | 0.355    | 0.355    | 0        | 0.355    | 0.355    | 0        | 0.355    |
| EnoCoADel   | 0.355    | 0.355    | 0.355    | 0        | 0.355    | 0.355    | 0        | 0.355    |
| 3HA-CoADe   | 0.355    | 0.355    | 0.355    | 0        | 0.355    | 0.355    | 0        | 0.355    |
| AcylCoAAT   | 0.355    | 0.355    | 0.355    | 0        | 0.355    | 0.355    | 0        | 0.355    |
| AcylCoADe   | 0.355    | 0.355    | 0.355    | 0        | 0.355    | 0.355    | 0        | 0.355    |
| EnoCoADel   | 0.355    | 0.355    | 0.355    | 0        | 0.355    | 0.355    | 0        | 0.355    |
| 3HA-CoADe   | 0.355    | 0.355    | 0.355    | 0        | 0.355    | 0.355    | 0        | 0.355    |
| AcylCoAAT   | 0.355    | 0.355    | 0.355    | 0        | 0.355    | 0.355    | 0        | 0.355    |
| AcylCoADe   | 0.355    | 0.355    | 0.355    | 0        | 0.355    | 0.355    | 0        | 0.355    |
| EnoCoADel   | 0.355    | 0.355    | 0.355    | 0        | 0.355    | 0.355    | 0        | 0.355    |
| 3HA-CoADe   | 0.355    | 0.355    | 0.355    | 0        | 0.355    | 0.355    | 0        | 0.355    |
| AcylCoAAT   | 0.355    | 0.355    | 0.355    | 0        | 0.355    | 0.355    | 0        | 0.355    |
| AcylCoADe   | 0.355    | 0.355    | 0.355    | 0        | 0.355    | 0.355    | 0        | 0.355    |
| EnoCoADel   | 0.355    | 0.355    | 0.355    | 0        | 0.355    | 0.355    | 0        | 0.355    |
| 3HA-CoADe   | 0.355    | 0.355    | 0.355    | 0        | 0.355    | 0.355    | 0        | 0.355    |
| AcylCoAAT   | 0.355    | 0.355    | 0.355    | 0        | 0.355    | 0.355    | 0        | 0.355    |
| AcylCoADe   | 0.355    | 0.355    | 0.355    | 0        | 0.355    | 0.355    | 0        | 0.355    |
| EnoCoADel   | 0.355    | 0.355    | 0.355    | 0        | 0.355    | 0.355    | 0        | 0.355    |
| 3HA-CoADe   | 0.355    | 0.355    | 0.355    | 0        | 0.355    | 0.355    | 0        | 0.355    |
| AcylCoAAT   | 0.355    | 0.355    | 0.355    | 0        | 0.355    | 0.355    | 0        | 0.355    |
| AcylCoADe   | 0.355    | 0.355    | 0.355    | 0        | 0.355    | 0.355    | 0        | 0.355    |
| EnoCoADel   | 0.355    | 0.355    | 0.355    | 0        | 0.355    | 0.355    | 0        | 0.355    |
| 3HA-CoADe   | 0.355    | 0.355    | 0.355    | 0        | 0.355    | 0.355    | 0        | 0.355    |
| AcylCoAAT   | 0.355    | 0.355    | 0.355    | 0        | 0.355    | 0.355    | 0        | 0.355    |
| AcylCoADe   | 0.355    | 0.355    | 0.355    | 0        | 0.355    | 0.355    | 0        | 0.355    |
| EnoCoADel   | 0.355    | 0.355    | 0.355    | 0        | 0.355    | 0.355    | 0        | 0.355    |
| 3HA-CoADe   | 0.355    | 0.355    | 0.355    | 0        | 0.355    | 0.355    | 0        | 0.355    |
| AcylCoAAT   | 0.355    | 0.355    | 0.355    | 0        | 0.355    | 0.355    | 0        | 0.355    |
| AcylCoADe   | 0.355    | 0.355    | 0.355    | 0        | 0.355    | 0.355    | 0        | 0.355    |
| EnoCoADel   | 0.355    | 0.355    | 0.355    | 0        | 0.355    | 0.355    | 0        | 0.355    |
| 3HA-CoADe   | 0.355    | 0.355    | 0.355    | 0        | 0.355    | 0.355    | 0        | 0.355    |
| AcylCoAAT   | 0.355    | 0.355    | 0.355    | 0        | 0.355    | 0.355    | 0        | 0.355    |
| AcylCoADe   | 0.355    | 0.355    | 0.355    | 0        | 0.355    | 0.355    | 0        | 0.355    |
| EnoCoADel   | 0.355    | 0.355    | 0.355    | 0        | 0.355    | 0.355    | 0        | 0.355    |
| 3HA-CoADe   | 0.355    | 0.355    | 0.355    | 0        | 0.355    | 0.355    | 0        | 0.355    |
| AcylCoAAT   | 0.355    | 0.355    | 0.355    | 0        | 0.355    | 0.355    | 0        | 0.355    |
| AcylCoADe   | 0.355    | 0.355    | 0.355    | 0        | 0.355    | 0.355    | 0        | 0.355    |
| EnoCoADel   | 0.355    | 0.355    | 0.355    | 0        | 0.355    | 0.355    | 0        | 0.355    |
| 3HA-CoADe   | 0.355    | 0.355    | 0.355    | 0        | 0.355    | 0.355    | 0        | 0.355    |
| AcylCoAAT   | 0.392874 | 0.392874 | 0.481796 | 0        | 0.570719 | 0.392874 | 0.057965 | 0.392874 |
| GK          | 0        | 0        | 0        | 0        | 0        | 0        | 0        | 0        |
| GPAT4       | 0        | 0        | 0        | 0        | 0        | 0        | 0        | 0        |
| ABHD5       | 0        | 0        | 0        | 0        | 0        | 0        | 0        | 0        |
| DAGZ/DAG    | 0        | 0        | 0        | 0        | 0        | 0        | 0        | 0        |
| DGAT1       | 0        | 0        | 0        | 0        | 0        | 0        | 0        | 0        |



|             |          |          |          |          |          |          |          |          |
|-------------|----------|----------|----------|----------|----------|----------|----------|----------|
| 3HA-CoADe   | 0        | 0        | 0        | 0        | 0        | 0        | 0        | 0        |
| AcylCoAAT   | 0        | 0        | 0        | 0        | 0        | 0        | 0        | 0        |
| AcylCoADe   | 0        | 0        | 0        | 0        | 0        | 0        | 0        | 0        |
| EnoCoADe    | 0        | 0        | 0        | 0        | 0        | 0        | 0        | 0        |
| 3HA-CoADe   | 0        | 0        | 0        | 0        | 0        | 0        | 0        | 0        |
| AcylCoAAT   | 0        | 0        | 0        | 0        | 0        | 0        | 0        | 0        |
| AKR1A1      | 0        | 0        | 0        | 0        | 0        | 0        | 0        | 0        |
| ALDH3A2     | 0        | 0        | 0        | 0        | 0        | 0        | 0        | 0        |
| GLYCTK      | 0        | 0        | 0        | 0        | 0        | 0        | 0        | 0        |
| EAA_arg     | -0.04645 | -0.04645 | -0.04645 | -0.04645 | -0.04645 | -0.04645 | -0.06036 | -0.04645 |
| EAA_his     | -0.01601 | -0.01601 | -0.01601 | -0.01601 | -0.01601 | -0.01601 | -0.05085 | -0.01601 |
| EAA_ile     | -0.062   | -0.062   | -0.062   | -40001.8 | -0.062   | -0.062   | -0.062   | -0.062   |
| EAA_leu     | -0.123   | -0.123   | -0.123   | -0.08513 | -0.30084 | -0.123   | -0.123   | -0.123   |
| EAA_lys     | -0.08998 | -0.08998 | -0.17891 | -0.08998 | -0.08998 | -0.08998 | -0.16251 | -0.08998 |
| EAA_met     | -0.025   | -0.025   | -0.025   | -0.025   | -0.025   | -0.025   | -0.03249 | -0.025   |
| EAA_phe     | -0.02968 | -0.02968 | -0.02968 | -0.02968 | -0.02968 | -0.02968 | -0.03857 | -0.02968 |
| EAA_thr     | -0.04734 | -0.04734 | -0.04734 | -0.04734 | -0.04734 | -0.04734 | -0.06152 | -0.04734 |
| EAA_trp     | -0.00494 | -0.00494 | -0.00494 | -0.00494 | -0.00494 | -0.00494 | -0.00642 | -0.00494 |
| EAA_val     | -0.233   | -0.233   | -0.233   | -0.233   | -0.233   | -0.233   | -0.233   | -0.233   |
| NEAA_ala    | -0.333   | -0.333   | -0.333   | -0.333   | -0.333   | -0.333   | -0.333   | -0.333   |
| NEAA_asn    | 0.537158 | 0.537158 | 0.715003 | -0.041   | 0.715003 | 0.537158 | -0.041   | 0.537158 |
| NEAA_asp    | -0.003   | -0.003   | -0.003   | -0.003   | -0.003   | -0.003   | -0.003   | -0.003   |
| NEAA_cys    | -0.01028 | -0.01028 | -0.01028 | -0.01028 | -0.01028 | -0.01028 | -0.01336 | -0.01028 |
| NEAA_glu    | -0.024   | -0.024   | -0.024   | -0.024   | -0.024   | -0.024   | -0.024   | -0.024   |
| NEAA_gln    | -0.586   | -0.586   | -0.586   | -0.586   | -0.586   | -0.586   | -0.586   | -0.586   |
| NEAA_gly    | -0.04715 | -0.04715 | -0.04715 | -0.04715 | -0.04715 | -0.04715 | -0.09131 | -0.04715 |
| NEAA_pro    | -0.168   | -0.168   | -0.168   | -0.168   | -0.168   | -0.168   | -0.168   | -0.168   |
| NEAA_ser    | 0.384843 | 0.384843 | 0.206998 | 40002.15 | 0.206998 | 0.384843 | 0.199317 | 0.384843 |
| NEAA_tyr    | -0.01738 | -0.01738 | -0.01738 | -0.01738 | -0.01738 | -0.01738 | -0.02258 | -0.01738 |
| DLDH        | 0.242956 | 0.242956 | 0.242956 | 40001.93 | 0.420801 | 0.242956 | 0.190544 | 0.242956 |
| MT_val      | 0.190796 | 0.190796 | 0.190796 | 0.190796 | 0.190796 | 0.190796 | 0.178159 | 0.190796 |
| BCAT2-val   | 0.190796 | 0.190796 | 0.190796 | 0.190796 | 0.190796 | 0.190796 | 0.178159 | 0.190796 |
| BCKDHB-val  | 0.190796 | 0.190796 | 0.190796 | 0.190796 | 0.190796 | 0.190796 | 0.178159 | 0.190796 |
| BCKADE2-val | 0.190796 | 0.190796 | 0.190796 | 0.190796 | 0.190796 | 0.190796 | 0.178159 | 0.190796 |
| ACADSB      | 0.190796 | 0.190796 | 0.190796 | 0.190796 | 0.190796 | 0.190796 | 0.178159 | 0.190796 |
| ECHS1       | 0.190796 | 0.190796 | 0.190796 | 0.190796 | 0.190796 | 0.190796 | 0.178159 | 0.190796 |
| HIBCH       | 0.190796 | 0.190796 | 0.190796 | 0.190796 | 0.190796 | 0.190796 | 0.178159 | 0.190796 |
| HIBADH      | 0.190796 | 0.190796 | 0.190796 | 0.190796 | 0.190796 | 0.190796 | 0.178159 | 0.190796 |
| ALDH6A1     | 0.190796 | 0.190796 | 0.190796 | 0.190796 | 0.190796 | 0.190796 | 0.178159 | 0.190796 |
| PCCB        | 0.205083 | 0.205083 | 0.205083 | 40001.93 | 0.205083 | 0.205083 | 0.178159 | 0.205083 |
| MCEE        | 0.205083 | 0.205083 | 0.205083 | 40001.93 | 0.205083 | 0.205083 | 0.178159 | 0.205083 |
| MUT         | 0.205083 | 0.205083 | 0.205083 | 40001.93 | 0.205083 | 0.205083 | 0.178159 | 0.205083 |
| MT_ile      | 0.014287 | 0.014287 | 0.014287 | 40001.74 | 0.014287 | 0.014287 | 0        | 0.014287 |
| BCAT-ile    | 0.014287 | 0.014287 | 0.014287 | 40001.74 | 0.014287 | 0.014287 | 0        | 0.014287 |
| BCKDHB-ile  | 0.014287 | 0.014287 | 0.014287 | 40001.74 | 0.014287 | 0.014287 | 0        | 0.014287 |
| BCKADE2-il  | 0.014287 | 0.014287 | 0.014287 | 40001.74 | 0.014287 | 0.014287 | 0        | 0.014287 |
| ECHS1       | 0.014287 | 0.014287 | 0.014287 | 40001.74 | 0.014287 | 0.014287 | 0        | 0.014287 |

|            |          |          |          |          |          |          |          |          |
|------------|----------|----------|----------|----------|----------|----------|----------|----------|
| HSD17B10   | 0.014287 | 0.014287 | 0.014287 | 40001.74 | 0.014287 | 0.014287 | 0        | 0.014287 |
| ACAT1      | 0.014287 | 0.014287 | 0.014287 | 40001.74 | 0.014287 | 0.014287 | 0        | 0.014287 |
| MT_leu     | 0.037874 | 0.037874 | 0.037874 | -1.5E-13 | 0.215719 | 0.037874 | 0.012385 | 0.037874 |
| BCAT2-leu  | 0.037874 | 0.037874 | 0.037874 | -1.5E-13 | 0.215719 | 0.037874 | 0.012385 | 0.037874 |
| BCKDHB-le  | 0.037874 | 0.037874 | 0.037874 | -1.5E-13 | 0.215719 | 0.037874 | 0.012385 | 0.037874 |
| BCKADE2-li | 0.037874 | 0.037874 | 0.037874 | 0        | 0.215719 | 0.037874 | 0.012385 | 0.037874 |
| IVD        | 0.037874 | 0.037874 | 0.037874 | 0        | 0.215719 | 0.037874 | 0.012385 | 0.037874 |
| MCC1,MCC   | 0.037874 | 0.037874 | 0.037874 | 0        | 0.215719 | 0.037874 | 0.012385 | 0.037874 |
| MGCA       | 0.037874 | 0.037874 | 0.037874 | 0        | 0.215719 | 0.037874 | 0.012385 | 0.037874 |
| HMGCL      | 0.037874 | 0.037874 | 0.037874 | 0        | 0.215719 | 0.037874 | 0.012385 | 0.037874 |
| OXCT       | 0.037874 | 0.037874 | 0.037874 | 0        | 0.215719 | 0.037874 | 0.012385 | 0.037874 |
| HMGCS2     | 0        | 0        | 0        | 0        | 0        | 0        | 0        | 0        |
| GluDeh     | 0.037874 | 0.037874 | 0.215719 | -8.3E-12 | 0.215719 | 0.037874 | 0.103545 | 0.037874 |
| GlnSynth   | 0.037874 | 0.037874 | 0.215719 | 19994.86 | 0.215719 | 0.037874 | 0.163639 | 0.037874 |
| GLN_Elim   | 0        | 0        | 0        | 0.540284 | 0        | 0        | 0.677958 | 0        |
| ALT        | -0.25312 | -0.25312 | -0.25312 | -0.25312 | -0.25312 | -0.25312 | -0.2292  | -0.25312 |
| ALA_Elim   | 0        | 0        | 0        | 0        | 0        | 0        | 0        | 0        |
| SDS        | 0        | 0        | 0        | 0        | 0        | 0        | 0        | 0        |
| CBS        | 0        | 0        | 0        | 0        | 0        | 0        | 0        | 0        |
| CTH        | 0        | 0        | 0        | 0        | 0        | 0        | 0        | 0        |
| ILVBL      | 0        | 0        | 0        | 0        | 0        | 0        | 0        | 0        |
| 2a2hButLe: | 0        | 0        | 0        | 0        | 0        | 0        | 0        | 0        |
| MT_lys     | 0        | 0        | 0.088922 | 0        | 0        | 0        | 0.04558  | 0        |
| AASS       | 0        | 0        | 0.088922 | 0        | 0        | 0        | 0.04558  | 0        |
| AASS       | 0        | 0        | 0.088922 | 0        | 0        | 0        | 0.04558  | 0        |
| aAASADeh   | 0        | 0        | 0.088922 | 0        | 0        | 0        | 0.04558  | 0        |
| KATII      | 0        | 0        | 0.088922 | 0        | 0        | 0        | 0.04558  | 0        |
| lysdeg     | 0        | 0        | 0.088922 | 0        | 0        | 0        | 0.04558  | 0        |
| GCDH       | 0        | 0        | 0.088922 | 0        | 0        | 0        | 0.04558  | 0        |
| MT_pro     | 0.139516 | 0.139516 | 0.139516 | 0.139516 | 0.139516 | 0.139516 | 0.130987 | 0.139516 |
| PRODH      | 12.87742 | 12.87742 | 13.23311 | 0.139516 | 13.41096 | 12.87742 | 0.350462 | 12.87742 |
| ALDH4a1    | 0.139516 | 0.139516 | 0.139516 | 0.139516 | 0.139516 | 0.139516 | 0.130987 | 0.139516 |
| GATM       | 0        | 0        | 0        | 0        | 0        | 0        | 0        | 0        |
| Dr_orn     | 0        | 0        | 0        | 0        | 0        | 0        | 0        | 0        |
| GAMT       | 0        | 0        | 0        | 0        | 0        | 0        | 0        | 0        |
| Dr_cr      | 0        | 0        | 0        | 0        | 0        | 0        | 0        | 0        |
| AdoHcyase  | 0        | 0        | 0        | 0        | 0        | 0        | 0        | 0        |
| MTR        | 0        | 0        | 0        | 0        | 0        | 0        | 0        | 0        |
| AdoMet     | 0        | 0        | 0        | 0        | 0        | 0        | 0        | 0        |
| SHMT       | 0        | 0        | 0        | 0        | 0        | 0        | -0.03005 | 0        |
| MTHFR      | 0        | 0        | 0        | 0        | 0        | 0        | 0        | 0        |
| DHFR       | 0        | 0        | 0        | 0        | 0        | 0        | 0        | 0        |
| HAL        | 0        | 0        | 0        | 0        | 0        | 0        | 0.030047 | 0        |
| FLJ31300   | 0        | 0        | 0        | 0        | 0        | 0        | 0.030047 | 0        |
| MGC35366   | 0        | 0        | 0        | 0        | 0        | 0        | 0.030047 | 0        |
| FTCD1      | 0        | 0        | 0        | 0        | 0        | 0        | 0.030047 | 0        |
| FTCD2      | 0        | 0        | 0        | 0        | 0        | 0        | 0.030047 | 0        |

|          |          |          |          |          |          |          |          |          |
|----------|----------|----------|----------|----------|----------|----------|----------|----------|
| FT       | 0        | 0        | 0        | 0        | 0        | 0        | 0.030047 | 0        |
| ASNase   | 0        | 0        | 0        | 19994.86 | 0        | 0        | 0        | 0        |
| ASNSynth | 0.571827 | 0.571827 | 0.749672 | 19994.86 | 0.749672 | 0.571827 | 0.00405  | 0.571827 |
| PHGDH    | 0.430967 | 0.430967 | 0.253122 | 40002.19 | 0.253122 | 0.430967 | 0.229204 | 0.430967 |
| PSA      | 0.430967 | 0.430967 | 0.253122 | 40002.19 | 0.253122 | 0.430967 | 0.229204 | 0.430967 |
| PSPH     | 0.430967 | 0.430967 | 0.253122 | 40002.19 | 0.253122 | 0.430967 | 0.229204 | 0.430967 |
| P5CS     | 0        | 0        | 0        | 0        | 0        | 0        | 0        | 0        |
| PYCS     | 0        | 0        | 0        | 0        | 0        | 0        | 0        | 0        |
| Spont    | 0        | 0        | 0        | 0        | 0        | 0        | 0        | 0        |
| PYRCR1   | 12.73791 | 12.73791 | 13.0936  | -8.3E-12 | 13.27144 | 12.73791 | 0.219476 | 12.73791 |
| PAG      | 0        | 0        | 0        | 0        | 0        | 0        | 0        | 0        |
| PCBD     | 0        | 0        | 0        | 0        | 0        | 0        | 0        | 0        |
| QDPR     | 0        | 0        | 0        | 0        | 0        | 0        | 0        | 0        |
| MT_glu   | 0.344598 | 0.344598 | 0.344598 | 40002.07 | 0.344598 | 0.344598 | 0.309146 | 0.344598 |
| tRNA     | 1.22E-16 | 1.05E-16 | -2.7E-16 | -2.1E-16 | -1.6E-16 | 2.1E-16  | -1.5E-16 | -3.4E-17 |
| YARS     | 0.017378 | 0.017378 | 0.017378 | 0.017378 | 0.017378 | 0.017378 | 0.022581 | 0.017378 |
| WARS     | 0.004943 | 0.004943 | 0.004943 | 0.004943 | 0.004943 | 0.004943 | 0.006424 | 0.004943 |
| TARS     | 0.047343 | 0.047343 | 0.047343 | 0.047343 | 0.047343 | 0.047343 | 0.061519 | 0.047343 |
| LARS     | 0.085126 | 0.085126 | 0.085126 | 0.085126 | 0.085126 | 0.085126 | 0.110615 | 0.085126 |
| IARS     | 0.047713 | 0.047713 | 0.047713 | 0.047713 | 0.047713 | 0.047713 | 0.062    | 0.047713 |
| KARS     | 0.089983 | 0.089983 | 0.089983 | 0.089983 | 0.089983 | 0.089983 | 0.116926 | 0.089983 |
| AARS     | 0.079878 | 0.079878 | 0.079878 | 0.079878 | 0.079878 | 0.079878 | 0.103796 | 0.079878 |
| VARS     | 0.042204 | 0.042204 | 0.042204 | 0.042204 | 0.042204 | 0.042204 | 0.054841 | 0.042204 |
| MARS     | 0.025    | 0.025    | 0.025    | 0.025    | 0.025    | 0.025    | 0.032486 | 0.025    |
| SARS     | 0.046124 | 0.046124 | 0.046124 | 0.046124 | 0.046124 | 0.046124 | 0.059934 | 0.046124 |
| DARS     | 0.047082 | 0.047082 | 0.047082 | 0.047082 | 0.047082 | 0.047082 | 0.061179 | 0.047082 |
| GARS     | 0.047147 | 0.047147 | 0.047147 | 0.047147 | 0.047147 | 0.047147 | 0.061264 | 0.047147 |
| PARS     | 0.028484 | 0.028484 | 0.028484 | 0.028484 | 0.028484 | 0.028484 | 0.037013 | 0.028484 |
| CARS     | 0.010279 | 0.010279 | 0.010279 | 0.010279 | 0.010279 | 0.010279 | 0.013356 | 0.010279 |
| EPRS     | 0.108798 | 0.108798 | 0.108798 | 0.108798 | 0.108798 | 0.108798 | 0.141375 | 0.108798 |
| QARS     | 0.052047 | 0.052047 | 0.052047 | 0.052047 | 0.052047 | 0.052047 | 0.067631 | 0.052047 |
| RARS     | 0.04645  | 0.04645  | 0.04645  | 0.04645  | 0.04645  | 0.04645  | 0.060359 | 0.04645  |
| FARS     | 0.029682 | 0.029682 | 0.029682 | 0.029682 | 0.029682 | 0.029682 | 0.03857  | 0.029682 |
| HARS     | 0.016006 | 0.016006 | 0.016006 | 0.016006 | 0.016006 | 0.016006 | 0.020799 | 0.016006 |
| NARS     | 0.034669 | 0.034669 | 0.034669 | 0.034669 | 0.034669 | 0.034669 | 0.04505  | 0.034669 |
| ACT      | 0.000152 | 0.000152 | 0.000152 | 0.000152 | 0.000152 | 0.000152 | 0.000198 | 0.000152 |
| MYOHC1-2 | 0        | 0        | 0        | 0        | 0        | 0        | 0        | 0        |
| MYOHC2a  | 0.000305 | 0.000305 | 0.000305 | 0.000305 | 0.000305 | 0.000305 | 0.000396 | 0.000305 |
| MYOHC2b  | 0        | 0        | 0        | 0        | 0        | 0        | 0        | 0        |
| MYOLCk   | 0.000305 | 0.000305 | 0.000305 | 0.000305 | 0.000305 | 0.000305 | 0.000396 | 0.000305 |
| MYOLCp   | 0.000305 | 0.000305 | 0.000305 | 0.000305 | 0.000305 | 0.000305 | 0.000396 | 0.000305 |
| MYO1-2x  | 0        | 0        | 0        | 0        | 0        | 0        | 0        | 0        |
| MYO2a    | 0.000152 | 0.000152 | 0.000152 | 0.000152 | 0.000152 | 0.000152 | 0.000198 | 0.000152 |
| MYO2x    | 0        | 0        | 0        | 0        | 0        | 0        | 0        | 0        |
| MYO2b    | 0        | 0        | 0        | 0        | 0        | 0        | 0        | 0        |
| TMN1     | 0        | 0        | 0        | 0        | 0        | 0        | 0        | 0        |
| TMN2     | 4.36E-05 | 4.36E-05 | 4.36E-05 | 4.36E-05 | 4.36E-05 | 4.36E-05 | 5.66E-05 | 4.36E-05 |

|             |          |          |          |          |          |          |          |          |
|-------------|----------|----------|----------|----------|----------|----------|----------|----------|
| DIM-TMN1    | 0        | 0        | 0        | 0        | 0        | 0        | 0        | 0        |
| DIM-TMN2    | 2.18E-05 | 2.18E-05 | 2.18E-05 | 2.18E-05 | 2.18E-05 | 2.18E-05 | 2.83E-05 | 2.18E-05 |
| TPNC1       | 0        | 0        | 0        | 0        | 0        | 0        | 0        | 0        |
| TPNC2       | 2.18E-05 | 2.18E-05 | 2.18E-05 | 2.18E-05 | 2.18E-05 | 2.18E-05 | 2.83E-05 | 2.18E-05 |
| TPNI1       | 0        | 0        | 0        | 0        | 0        | 0        | 0        | 0        |
| TPNI2       | 2.18E-05 | 2.18E-05 | 2.18E-05 | 2.18E-05 | 2.18E-05 | 2.18E-05 | 2.83E-05 | 2.18E-05 |
| TPNT1       | 0        | 0        | 0        | 0        | 0        | 0        | 0        | 0        |
| TPNT2       | 2.18E-05 | 2.18E-05 | 2.18E-05 | 2.18E-05 | 2.18E-05 | 2.18E-05 | 2.83E-05 | 2.18E-05 |
| TPN1        | 0        | 0        | 0        | 0        | 0        | 0        | 0        | 0        |
| TPN2        | 2.18E-05 | 2.18E-05 | 2.18E-05 | 2.18E-05 | 2.18E-05 | 2.18E-05 | 2.83E-05 | 2.18E-05 |
| CONTR-CO    | 0        | 0        | 0        | 0        | 0        | 0        | 0        | 0        |
| CONTR-CO    | 2.18E-05 | 2.18E-05 | 2.18E-05 | 2.18E-05 | 2.18E-05 | 2.18E-05 | 2.83E-05 | 2.18E-05 |
| CONTR-CO    | 0        | 0        | 0        | 0        | 0        | 0        | 0        | 0        |
| CONTR-CO    | 0        | 0        | 0        | 0        | 0        | 0        | 0        | 0        |
| Str_CONTR   | 0        | 0        | 0        | 0        | 0        | 0        | 0        | 0        |
| Str_CONTR   | 2.18E-05 | 2.18E-05 | 2.18E-05 | 2.18E-05 | 2.18E-05 | 2.18E-05 | 2.83E-05 | 2.18E-05 |
| Str_CONTR   | 0        | 0        | 0        | 0        | 0        | 0        | 0        | 0        |
| Str_CONTR   | 0        | 0        | 0        | 0        | 0        | 0        | 0        | 0        |
| CKM         | -227.568 | -227.568 | -229.702 | -999999  | -231.48  | -227.568 | -2.19138 | -227.568 |
| Spont       | 227.5677 | 227.5677 | 229.7018 | 999999   | 231.4802 | 227.5677 | 2.191377 | 227.5677 |
| Nut_cr      | 0        | 0        | 0        | 0        | 0        | 0        | 6.99E-17 | 0        |
| ATP2UTP     | 0        | 0        | 0        | 0        | 0        | 0        | 0        | 0        |
| UDP2ADP     | 0        | 0        | 0        | 0        | 0        | 0        | 0        | 0        |
| PGM1        | 0        | 0        | 0        | 0        | 0        | 0        | 0        | 0        |
| UGP2        | 0        | 0        | 0        | 0        | 0        | 0        | 0        | 0        |
| mGYG        | 0        | 0        | 0        | 0        | 0        | 0        | 0        | 0        |
| mGYS1       | 0        | 0        | 0        | 0        | 0        | 0        | 0        | 0        |
| G6PD        | 0.000005 | 0.000005 | 0        | 0        | 0.000005 | 0.000005 | 0        | 0.000005 |
| PGLS        | 0.000005 | 0.000005 | 0        | 0        | 0.000005 | 0.000005 | 0        | 0.000005 |
| PGD         | -5E-06   | -5E-06   | 0        | 0        | -5E-06   | -5E-06   | 0        | -5E-06   |
| PGD         | 0.00001  | 0.00001  | 0        | 0        | 0.00001  | 0.00001  | 0        | 0.00001  |
| RPE         | 3.33E-06 | 3.33E-06 | 0        | 0        | 3.33E-06 | 3.33E-06 | 0        | 3.33E-06 |
| RPIA        | 1.67E-06 | 1.67E-06 | 0        | 0        | 1.67E-06 | 1.67E-06 | 0        | 1.67E-06 |
| TKT1        | 1.67E-06 | 1.67E-06 | 0        | 0        | 1.67E-06 | 1.67E-06 | 0        | 1.67E-06 |
| TKT2        | -1.7E-06 | -1.7E-06 | 0        | 0        | -1.7E-06 | -1.7E-06 | 0        | -1.7E-06 |
| TALDO       | 1.67E-06 | 1.67E-06 | 0        | 0        | 1.67E-06 | 1.67E-06 | 0        | 1.67E-06 |
| RBSK        | 0        | 0        | 0        | 0        | 0        | 0        | 0        | 0        |
| GCL         | 0        | 0        | 0        | 0        | 0        | 0        | 0        | 0        |
| GSS         | 0        | 0        | 0        | 0        | 0        | 0        | 0        | 0        |
| glutathxpo  | 0        | 0        | 0        | 0        | 0        | 0        | 0        | 0        |
| GSR         | 0        | 0        | 0        | 0        | 0        | 0        | 0        | 0        |
| GSR         | 0        | 0        | 0        | 0        | 0        | 0        | 0        | 0        |
| GlutathLea  | 0        | 0        | 0        | 0        | 0        | 0        | 0        | 0        |
| GlutathLea  | 0        | 0        | 0        | 0        | 0        | 0        | 0        | 0        |
| Recycle_na  | 0        | 0        | 0        | 0        | 0        | 0        | 0        | 0        |
| fa-c6 leak  | 0        | 0        | 0        | 0        | 0        | 0        | 0        | 0        |
| acetyLeak(i | 0.037874 | 0.037874 | 0.037874 | 0        | 0.215719 | 0.037874 | 0.012385 | 0.037874 |



0 0 0 0 0 0 0 0



|          |          |          |          |          |          |          |          |          |          |
|----------|----------|----------|----------|----------|----------|----------|----------|----------|----------|
| 0        | 0        | 0        | 0        | 0        | 0        | 0        | 0        | 0        | 0        |
| 0        | 0        | 0        | 0        | 0        | 0        | 0        | 0        | 0        | 0        |
| 0.23     | 0.23     | 0        | 0        | 0.23     | 0.23     | 0.23     | 0        | 0.23     | 0.23     |
| 0        | 0        | 0        | 0        | 0        | 0        | 0        | 0        | 0        | 0        |
| 0        | 0        | 0        | 0        | 0        | 0        | 0        | 0        | 0        | 0        |
| 0.23     | 0.23     | 0        | 0        | 0.23     | 0.23     | 0.23     | -1.2E-17 | 0.23     | 0.23     |
| 0        | 0        | 0        | 0        | 0        | 0        | 0        | 0        | 0        | 0        |
| 0        | 0        | 0        | 0        | 0        | 0        | 0        | 0        | 0        | 0        |
| 0        | 0        | 0.069004 | 0        | 0        | 0        | 0        | 0        | 0        | 0        |
| 0        | 0        | 9.930986 | 0        | 0        | 0        | 0        | 0        | 0        | 0        |
| 5        | 5        | 5        | 0        | 5        | 0        | 5        | 0.020833 | 5        | 5        |
| 4.999995 | 4.999995 | 5        | 0        | 5        | 0        | 4.999995 | 0.020833 | 5        | 5        |
| 4.999998 | 4.999998 | 5        | 0        | 5        | 0        | 4.999998 | 0.020833 | 5        | 5        |
| 0        | 0        | 0        | 0        | 0        | 0        | 0        | 0        | 0        | 0        |
| 4.999998 | 4.999998 | 5        | 0        | 5        | 0        | 4.999998 | 0.020833 | 5        | 5        |
| -5       | -5       | -5       | 0        | -5       | 0        | -5       | 0.020833 | -5       | -5       |
| 9.999998 | 9.999998 | 10       | 0        | 10       | 0        | 9.999998 | 0        | 10       | 10       |
| 9.999998 | 9.999998 | 10       | 0        | 10       | 0        | 9.999998 | 0        | 10       | 10       |
| 9.569031 | 9.569031 | -52620.1 | -333333  | 9.746878 | -62496.9 | 9.569031 | -0.38998 | 9.531159 | 9.531159 |
| 9.569031 | 9.569031 | -52620.1 | -333333  | 9.746878 | -62496.9 | 9.569031 | -0.38998 | 9.531159 | 9.531159 |
| 9.746876 | 9.746876 | 210529   | 0        | 9.746878 | 0        | 9.746876 | 375001.4 | 374996.5 | 374996.5 |
| 0        | 0        | 210529.2 | 333332.6 | 0        | 0.253122 | 0        | 375001.7 | 374986.7 | 374986.7 |
| 0        | 0        | 0        | 0        | 0        | 0        | 0        | 0        | 0        | 0        |
| 0.177845 | 0.177845 | 52619.88 | 0        | 0        | 62496.67 | 0.177845 | 0.136861 | 0.215719 | 0.215719 |
| 0        | 0        | 0        | -0.069   | 0        | 0        | 0        | -0.45786 | 0        | 0        |
| 10.43098 | 10.43098 | 52640.14 | 333332.5 | 10.25312 | 62496.83 | 10.43098 | -0.13686 | 10.46884 | 10.46884 |
| 10.60882 | 10.60882 | 105269.9 | 333332.5 | 10.25312 | 124993.5 | 10.60882 | 0        | 10.68456 | 10.68456 |
| 0        | 0        | 0        | 0        | 0        | 0        | 0        | 0.041667 | 0        | 0        |
| 10.43098 | 10.43098 | 52640.14 | 333332.5 | 10.25312 | 62496.83 | 10.43098 | -0.13686 | 10.46884 | 10.46884 |
| 11.22473 | 11.22473 | 105270   | 333332.5 | 11.04688 | 62497.5  | 11.22473 | 124999.8 | 124985.3 | 124985.3 |
| 9.999998 | 9.999998 | 0        | 0        | 10       | 62497.06 | 9.999998 | 0        | 10       | 10       |
| 11.22473 | 11.22473 | 105270   | 333332.5 | 11.04688 | 62497.5  | 11.22473 | 124999.8 | 124985.3 | 124985.3 |
| 0        | 0        | 0        | 0        | 0        | 0        | 0        | 0        | 0        | 0        |
| 9.999998 | 9.999998 | 0        | 0        | 10       | 62497.06 | 9.999998 | 0        | 10       | 10       |
| 12.70003 | 12.70003 | 0.014287 | 0.014287 | 12.87788 | 62499.96 | 12.70003 | 0.014287 | 12.62429 | 12.62429 |
| 12.70003 | 12.70003 | 0.014287 | 0.014287 | 12.87788 | 62499.96 | 12.70003 | 0.014287 | 12.62429 | 12.62429 |
| 0        | 0        | 0        | 0        | 0        | 0        | 0        | 0        | 0        | 0        |
| 12.70003 | 12.70003 | 0.014287 | 0.014287 | 12.87788 | 62499.96 | 12.70003 | 0.014287 | 12.62429 | 12.62429 |
| 13.2887  | 13.2887  | 0        | 0        | 13.46655 | 62500.61 | 13.2887  | 124999.9 | 124987.3 | 124987.3 |
| 13.45591 | 13.45591 | 52629.87 | 0.058368 | 13.63376 | 62500.59 | 13.45591 | 124999.9 | 124987.5 | 124987.5 |
| 13.49379 | 13.49379 | 52629.87 | 0.058368 | 13.67163 | 62500.63 | 13.49379 | 124999.9 | 124987.5 | 124987.5 |
| 13.49379 | 13.49379 | 52629.87 | 0.058368 | 13.67163 | 62500.63 | 13.49379 | 124999.9 | 124987.5 | 124987.5 |
| 23.92476 | 23.92476 | 105270   | 333332.5 | 23.92475 | 124997.5 | 23.92476 | 124999.8 | 124998   | 124998   |
| 49.89181 | 49.89181 | 263159.7 | 333332.8 | 50.2475  | 249997.4 | 49.89181 | 249999.7 | 249997.9 | 249997.9 |
| 28.85488 | 28.85488 | 105259.9 | 0.256253 | 29.47734 | 125003.3 | 28.85488 | 124999.9 | 125002.7 | 125002.7 |
| 78.74669 | 78.74669 | 368419.6 | 333333.1 | 79.72484 | 375000.8 | 78.74669 | 374999.6 | 375000.6 | 375000.6 |
| 39.37335 | 39.37335 | 184209.8 | 166666.5 | 39.86242 | 187500.4 | 39.37335 | 187499.8 | 187500.3 | 187500.3 |

|          |          |          |          |          |          |          |          |          |
|----------|----------|----------|----------|----------|----------|----------|----------|----------|
| 207.3852 | 207.3852 | 999999   | 999999   | 209.6972 | 999999   | 207.3852 | 999999   | 999999   |
| 1.603164 | 1.603164 | 210530.1 | 333333.5 | 1.781009 | 531250.1 | 1.603164 | 437501.3 | 499972.5 |
| 0.125    | 0.125    | 0        | 0        | 0.125    | 0.125    | 0.125    | 0.125    | 0.125    |
| 0.125    | 0.125    | 0        | 0        | 0.125    | 0.125    | 0.125    | 0        | 0.125    |
| 0.125    | 0.125    | 0        | 0        | 0.125    | 0.125    | 0.125    | 0        | 0.125    |
| 0.125    | 0.125    | 0        | 0        | 0.125    | 0.125    | 0.125    | 0        | 0.125    |
| 0        | 0        | 0        | 0        | 0        | 0        | 0        | 0        | 0        |
| 0        | 0        | 0        | 0        | 0        | 0        | 0        | 0        | 0        |
| 0        | 0        | 0        | 0        | 0        | 0        | 0        | 0        | 0        |
| 0        | 0        | 0        | 0        | 0        | 0        | 0        | 0        | 0        |
| 0.125    | 0.125    | 0        | 0        | 0.125    | 0.125    | 0.125    | 0        | 0.125    |
| 0.125    | 0.125    | 0        | 0        | 0.125    | 0.125    | 0.125    | 0        | 0.125    |
| 0.125    | 0.125    | 0        | 0        | 0.125    | 0.125    | 0.125    | 0        | 0.125    |
| 0.125    | 0.125    | 0        | 0        | 0.125    | 0.125    | 0.125    | 0        | 0.125    |
| 0        | 0        | 0        | 0        | 0        | 0        | 0        | 0        | 0        |
| 0        | 0        | 0        | 0        | 0        | 0        | 0        | 0        | 0        |
| 0        | 0        | 0        | 0        | 0        | 0        | 0        | 0        | 0        |
| 0        | 0        | 0        | 0        | 0        | 0        | 0        | 0        | 0        |
| 0.355    | 0.355    | 0        | 0        | 0.355    | 0.355    | 0.355    | 0        | 0.355    |
| 0.355    | 0.355    | 0        | 0        | 0.355    | 0.355    | 0.355    | 0        | 0.355    |
| 0.355    | 0.355    | 0        | 0        | 0.355    | 0.355    | 0.355    | 0        | 0.355    |
| 0.355    | 0.355    | 0        | 0        | 0.355    | 0.355    | 0.355    | 0        | 0.355    |
| 0.355    | 0.355    | 0        | 0        | 0.355    | 0.355    | 0.355    | 0        | 0.355    |
| 0.355    | 0.355    | 0        | 0        | 0.355    | 0.355    | 0.355    | 0        | 0.355    |
| 0.355    | 0.355    | 0        | 0        | 0.355    | 0.355    | 0.355    | 0        | 0.355    |
| 0.355    | 0.355    | 0        | 0        | 0.355    | 0.355    | 0.355    | 0        | 0.355    |
| 0.355    | 0.355    | 0        | 0        | 0.355    | 0.355    | 0.355    | 0        | 0.355    |
| 0.355    | 0.355    | 0        | 0        | 0.355    | 0.355    | 0.355    | 0        | 0.355    |
| 0.355    | 0.355    | 0        | 0        | 0.355    | 0.355    | 0.355    | 0        | 0.355    |
| 0.355    | 0.355    | 0        | 0        | 0.355    | 0.355    | 0.355    | 0        | 0.355    |
| 0.355    | 0.355    | 0        | 0        | 0.355    | 0.355    | 0.355    | 0        | 0.355    |
| 0.355    | 0.355    | 0        | 0        | 0.355    | 0.355    | 0.355    | 0        | 0.355    |
| 0.355    | 0.355    | 0        | 0        | 0.355    | 0.355    | 0.355    | 0        | 0.355    |
| 0.355    | 0.355    | 0        | 0        | 0.355    | 0.355    | 0.355    | 0        | 0.355    |
| 0.355    | 0.355    | 0        | 0        | 0.355    | 0.355    | 0.355    | 0        | 0.355    |
| 0.355    | 0.355    | 0        | 0        | 0.355    | 0.355    | 0.355    | 0        | 0.355    |
| 0.355    | 0.355    | 0        | 0        | 0.355    | 0.355    | 0.355    | 0        | 0.355    |
| 0.355    | 0.355    | 0        | 0        | 0.443922 | 0.453017 | 0.355    | 0        | 0.355    |
| 0.355    | 0.355    | 0        | 0        | 0.443922 | 0.453017 | 0.355    | 0        | 0.355    |
| 0.392874 | 0.392874 | 0        | 0        | 0.481796 | 0.490891 | 0.392874 | 0        | 0.355    |
| 0        | 0        | 0        | 0        | 0        | 0        | 0        | 0        | 0        |
| 0        | 0        | 0        | 0        | 0        | 0        | 0        | 0.041667 | 0        |
| 0        | 0        | 0        | 0        | 0        | 0        | 0        | 0.041667 | 0        |
| 0        | 0        | 0        | 0        | 0        | 0        | 0        | 0.041667 | 0        |
| 0        | 0        | 0        | 0        | 0        | 0        | 0        | 0.041667 | 0        |











|          |          |          |          |          |          |          |          |          |          |
|----------|----------|----------|----------|----------|----------|----------|----------|----------|----------|
| 0        | 0        | 0        | 0        | 0        | 0        | 0        | 0        | 0        | 0        |
| 2.18E-05 | 2.18E-05 | 2.18E-05 | 2.18E-05 | 2.18E-05 | 2.18E-05 | 2.18E-05 | 2.18E-05 | 2.18E-05 | 2.18E-05 |
| 0        | 0        | 0        | 0        | 0        | 0        | 0        | 0        | 0        | 0        |
| 2.18E-05 | 2.18E-05 | 2.18E-05 | 2.18E-05 | 2.18E-05 | 2.18E-05 | 2.18E-05 | 2.18E-05 | 2.18E-05 | 2.18E-05 |
| 0        | 0        | 0        | 0        | 0        | 0        | 0        | 0        | 0        | 0        |
| 2.18E-05 | 2.18E-05 | 2.18E-05 | 2.18E-05 | 2.18E-05 | 2.18E-05 | 2.18E-05 | 2.18E-05 | 2.18E-05 | 2.18E-05 |
| 0        | 0        | 0        | 0        | 0        | 0        | 0        | 0        | 0        | 0        |
| 2.18E-05 | 2.18E-05 | 2.18E-05 | 2.18E-05 | 2.18E-05 | 2.18E-05 | 2.18E-05 | 2.18E-05 | 2.18E-05 | 2.18E-05 |
| 0        | 0        | 0        | 0        | 0        | 0        | 0        | 0        | 0        | 0        |
| 2.18E-05 | 2.18E-05 | 2.18E-05 | 2.18E-05 | 2.18E-05 | 2.18E-05 | 2.18E-05 | 2.18E-05 | 2.18E-05 | 2.18E-05 |
| 0        | 0        | 0        | 0        | 0        | 0        | 0        | 0        | 0        | 0        |
| 2.18E-05 | 2.18E-05 | 2.18E-05 | 2.18E-05 | 2.18E-05 | 2.18E-05 | 2.18E-05 | 2.18E-05 | 2.18E-05 | 2.18E-05 |
| 0        | 0        | 0        | 0        | 0        | 0        | 0        | 0        | 0        | 0        |
| 0        | 0        | 0        | 0        | 0        | 0        | 0        | 0        | 0        | 0        |
| 0        | 0        | 0        | 0        | 0        | 0        | 0        | 0        | 0        | 0        |
| 2.18E-05 | 2.18E-05 | 2.18E-05 | 2.18E-05 | 2.18E-05 | 2.18E-05 | 2.18E-05 | 2.18E-05 | 2.18E-05 | 2.18E-05 |
| 0        | 0        | 0        | 0        | 0        | 0        | 0        | 0        | 0        | 0        |
| 0        | 0        | 0        | 0        | 0        | 0        | 0        | 0        | 0        | 0        |
| -227.568 | -227.568 | -999997  | -666665  | -229.702 | 0        | -227.568 | -999999  | -999999  | -999999  |
| 227.5677 | 227.5677 | 999996.9 | 666664.6 | 229.7018 | 0        | 227.5677 | 999999   | 999999   | 999999   |
| 0        | 0        | 0        | 0        | 0        | 0        | 0        | 0        | 0        | -4.6E-11 |
| 0        | 0        | 0        | 0        | 0        | 0        | 0        | 0        | 0        | 0        |
| 0        | 0        | 0        | 0        | 0        | 0        | 0        | 0        | 0        | 0        |
| 0        | 0        | 0        | 0        | 0        | 0        | 0        | 0        | 0        | 0        |
| 0        | 0        | 0        | 0        | 0        | 0        | 0        | 0        | 0        | 0        |
| 0        | 0        | 0        | 0        | 0        | 0        | 0        | 0        | 0        | 0        |
| 0        | 0        | 0        | 0        | 0        | 0        | 0        | 0        | 0        | 0        |
| 0.000005 | 0.000005 | 0        | 0        | 0        | 0        | 0.000005 | 0        | 0        | 0        |
| 0.000005 | 0.000005 | 0        | 0        | 0        | 0        | 0.000005 | 0        | 0        | 0        |
| -5E-06   | -5E-06   | 0        | 0        | 0        | 0        | -5E-06   | 0        | 0        | 0        |
| 0.00001  | 0.00001  | 0        | 0        | 0        | 0        | 0.00001  | 0        | 0        | 0        |
| 3.33E-06 | 3.33E-06 | 0        | 0        | 0        | 0        | 3.33E-06 | 0        | 0        | 0        |
| 1.67E-06 | 1.67E-06 | 0        | 0        | 0        | 0        | 1.67E-06 | 0        | 0        | 0        |
| 1.67E-06 | 1.67E-06 | 0        | 0        | 0        | 0        | 1.67E-06 | 0        | 0        | 0        |
| -1.7E-06 | -1.7E-06 | 0        | 0        | 0        | 0        | -1.7E-06 | 0        | 0        | 0        |
| 1.67E-06 | 1.67E-06 | 0        | 0        | 0        | 0        | 1.67E-06 | 0        | 0        | 0        |
| 0        | 0        | 0        | 0        | 0        | 0        | 0        | 0        | 0        | 0        |
| 0        | 0        | 0        | 0        | 0        | 0        | 0        | 0        | 0        | 0        |
| 0        | 0        | 0        | 0        | 0        | 0        | 0        | 0        | 0        | 0        |
| 0        | 0        | 0        | 0        | 0        | 0        | 0        | 0        | 0        | 0        |
| 0        | 0        | 0        | 0        | 0        | 0        | 0        | 0        | 0        | 0        |
| 0        | 0        | 0        | 0        | 0        | 0        | 0        | 0        | 0        | 0        |
| 0        | 0        | 0        | 0        | 0        | 0        | 0        | 0        | 0        | 0        |
| 0        | 0        | 0        | 0        | 0        | 0        | 0        | 0        | 0        | 0        |
| 0        | 0        | 0        | 0        | 0        | 0        | 0        | 0        | 0        | 0        |
| 0.037874 | 0.037874 | 0        | 0        | 0.037874 | 0.037874 | 0.037874 | 0        | 0        | 0        |

0 0 0 0 0 0 0 0 0



|          |          |          |          |
|----------|----------|----------|----------|
| 0        | 0        | 0        | 0        |
| 0        | 0        | 0        | 0        |
| 0.23     | 0        | 0.23     | 0.23     |
| 0        | 0        | 0        | 0        |
| 0        | 0        | 0        | 0        |
| 0.23     | 0        | 0.23     | 0.23     |
| 0        | 0        | 0        | 0        |
| 0        | 0        | 0        | 0        |
| 0        | 0        | 0        | 0        |
| 0        | 0        | 0        | 0        |
| 5        | 0        | 5        | 5        |
| 4.999995 | 0        | 4.999995 | 4.999995 |
| 4.999998 | 0        | 4.999998 | 4.999998 |
| 0        | 0        | 0        | 0        |
| 4.999998 | 0        | 4.999998 | 4.999998 |
| -5       | 0        | -5       | -5       |
| 9.999998 | 0        | 9.999998 | 9.999998 |
| 9.999998 | 0        | 9.999998 | 9.999998 |
| 9.569031 | -0.25312 | 9.569031 | 9.569031 |
| 9.569031 | -0.25312 | 9.569031 | 9.569031 |
| 9.746876 | 0        | 9.746876 | 9.746876 |
| 0        | 0.253122 | 0        | 0        |
| 0        | 0        | 0        | 0        |
| 0.177845 | 0        | 0.177845 | 0.177845 |
| 0        | -0.25312 | 0        | 0        |
| 10.43098 | 0        | 10.43098 | 10.43098 |
| 10.60882 | 0        | 10.60882 | 10.60882 |
| 0        | 0        | 0        | 0        |
| 10.43098 | 0        | 10.43098 | 10.43098 |
| 11.22473 | 0.044082 | 11.22473 | 11.22473 |
| 9.999998 | 0        | 9.999998 | 9.999998 |
| 11.22473 | 0.044082 | 11.22473 | 11.22473 |
| 0        | 0        | 0        | 0        |
| 9.999998 | 0        | 9.999998 | 9.999998 |
| 12.70003 | 0.014287 | 12.70003 | 12.70003 |
| 12.70003 | 0.014287 | 12.70003 | 12.70003 |
| 0        | 0        | 0        | 0        |
| 12.70003 | 0.014287 | 12.70003 | 12.70003 |
| 13.2887  | 0.044082 | 13.2887  | 13.2887  |
| 13.45591 | 0.058368 | 13.45591 | 13.45591 |
| 13.49379 | 0.058368 | 13.49379 | 13.49379 |
| 13.49379 | 0.058368 | 13.49379 | 13.49379 |
| 23.92476 | 0.058368 | 23.92476 | 23.92476 |
| 49.89181 | 199999.8 | 49.89181 | 49.89181 |
| 28.85488 | 199999.8 | 28.85488 | 28.85488 |
| 78.74669 | 399999.6 | 78.74669 | 78.74669 |
| 39.37335 | 199999.8 | 39.37335 | 39.37335 |











|          |          |          |          |
|----------|----------|----------|----------|
| 0        | 0        | 0        | 0        |
| 0        | 0        | 0        | 0        |
| 0.571827 | 0        | 0.571827 | 0.571827 |
| 0.430967 | 0.253122 | 0.430967 | 0.430967 |
| 0.430967 | 0.253122 | 0.430967 | 0.430967 |
| 0.430967 | 0.253122 | 0.430967 | 0.430967 |
| 0        | 0        | 0        | 0        |
| 0        | 0        | 0        | 0        |
| 0        | 0        | 0        | 0        |
| 12.73791 | 0.014287 | 12.73791 | 12.73791 |
| 0        | 0        | 0        | 0        |
| 0        | 0        | 0        | 0        |
| 0        | 0        | 0        | 0        |
| 0.344598 | 199999.7 | 0.344598 | 0.344598 |
| 1.37E-16 | 6.84E-17 | 1.22E-16 | 1.22E-16 |
| 0.017378 | 0.017378 | 0.017378 | 0.017378 |
| 0.004943 | 0.004943 | 0.004943 | 0.004943 |
| 0.047343 | 0.047343 | 0.047343 | 0.047343 |
| 0.085126 | 0.085126 | 0.085126 | 0.085126 |
| 0.047713 | 0.047713 | 0.047713 | 0.047713 |
| 0.089983 | 0.089983 | 0.089983 | 0.089983 |
| 0.079878 | 0.079878 | 0.079878 | 0.079878 |
| 0.042204 | 0.042204 | 0.042204 | 0.042204 |
| 0.025    | 0.025    | 0.025    | 0.025    |
| 0.046124 | 0.046124 | 0.046124 | 0.046124 |
| 0.047082 | 0.047082 | 0.047082 | 0.047082 |
| 0.047147 | 0.047147 | 0.047147 | 0.047147 |
| 0.028484 | 0.028484 | 0.028484 | 0.028484 |
| 0.010279 | 0.010279 | 0.010279 | 0.010279 |
| 0.108798 | 0.108798 | 0.108798 | 0.108798 |
| 0.052047 | 0.052047 | 0.052047 | 0.052047 |
| 0.04645  | 0.04645  | 0.04645  | 0.04645  |
| 0.029682 | 0.029682 | 0.029682 | 0.029682 |
| 0.016006 | 0.016006 | 0.016006 | 0.016006 |
| 0.034669 | 0.034669 | 0.034669 | 0.034669 |
| 0.000152 | 0.000152 | 0.000152 | 0.000152 |
| 0        | 0        | 0        | 0        |
| 0.000305 | 0.000305 | 0.000305 | 0.000305 |
| 0        | 0        | 0        | 0        |
| 0.000305 | 0.000305 | 0.000305 | 0.000305 |
| 0.000305 | 0.000305 | 0.000305 | 0.000305 |
| 0        | 0        | 0        | 0        |
| 0.000152 | 0.000152 | 0.000152 | 0.000152 |
| 0        | 0        | 0        | 0        |
| 0        | 0        | 0        | 0        |
| 0        | 0        | 0        | 0        |
| 4.36E-05 | 4.36E-05 | 4.36E-05 | 4.36E-05 |

|          |          |          |          |
|----------|----------|----------|----------|
| 0        | 0        | 0        | 0        |
| 2.18E-05 | 2.18E-05 | 2.18E-05 | 2.18E-05 |
| 0        | 0        | 0        | 0        |
| 2.18E-05 | 2.18E-05 | 2.18E-05 | 2.18E-05 |
| 0        | 0        | 0        | 0        |
| 2.18E-05 | 2.18E-05 | 2.18E-05 | 2.18E-05 |
| 0        | 0        | 0        | 0        |
| 2.18E-05 | 2.18E-05 | 2.18E-05 | 2.18E-05 |
| 0        | 0        | 0        | 0        |
| 2.18E-05 | 2.18E-05 | 2.18E-05 | 2.18E-05 |
| 0        | 0        | 0        | 0        |
| 2.18E-05 | 2.18E-05 | 2.18E-05 | 2.18E-05 |
| 0        | 0        | 0        | 0        |
| 0        | 0        | 0        | 0        |
| 0        | 0        | 0        | 0        |
| 2.18E-05 | 2.18E-05 | 2.18E-05 | 2.18E-05 |
| 0        | 0        | 0        | 0        |
| 0        | 0        | 0        | 0        |
| -227.568 | -999997  | -227.568 | -227.568 |
| 227.5677 | 999996.7 | 227.5677 | 227.5677 |
| 0        | 0        | 0        | 0        |
| 0        | 0        | 0        | 0        |
| 0        | 0        | 0        | 0        |
| 0        | 0        | 0        | 0        |
| 0        | 0        | 0        | 0        |
| 0        | 0        | 0        | 0        |
| 0        | 0        | 0        | 0        |
| 0.000005 | 0        | 0.000005 | 0.000005 |
| 0.000005 | 0        | 0.000005 | 0.000005 |
| -5E-06   | 0        | -5E-06   | -5E-06   |
| 0.00001  | 0        | 0.00001  | 0.00001  |
| 3.33E-06 | 0        | 3.33E-06 | 3.33E-06 |
| 1.67E-06 | 0        | 1.67E-06 | 1.67E-06 |
| 1.67E-06 | 0        | 1.67E-06 | 1.67E-06 |
| -1.7E-06 | 0        | -1.7E-06 | -1.7E-06 |
| 1.67E-06 | 0        | 1.67E-06 | 1.67E-06 |
| 0        | 0        | 0        | 0        |
| 0        | 0        | 0        | 0        |
| 0        | 0        | 0        | 0        |
| 0        | 0        | 0        | 0        |
| 0        | 0        | 0        | 0        |
| 0        | 0        | 0        | 0        |
| 0        | 0        | 0        | 0        |
| 0        | 0        | 0        | 0        |
| 0        | 0        | 0        | 0        |
| 0        | 0        | 0        | 0        |
| 0        | 0        | 0        | 0        |
| 0.037874 | 0        | 0.037874 | 0.037874 |

0

0

0

0
