# Supplementary material for: To Supplement or Not to Supplement: A Metabolic Network Framework for Human Nutritional Supplements
Source: PubMed Central journal article supplement (PMC3740736; doi:10.1371/journal.pone.0068751), 2013-08-05
Supplement: pone.0068751.s003.pdf [file pone.0068751.s003.pdf]

| 0 Enzyme                                    | Abrev         | EC Number | Location       | Pathway           | Reaction                                | Lower Bound | Upper Bound | Thermodynamics |
|---------------------------------------------|---------------|-----------|----------------|-------------------|-----------------------------------------|-------------|-------------|----------------|
| 1 ATP Objective Flux                        | Obj_atp       |           |                | Objective         | atp -->                                 | 0           | 999999      |                |
| 2 Insulin Availability                      | Ex_ins        |           |                | Signaling/Hormone | insulin[e] <==>                         | -999999     | 0           |                |
| 3 Glucose Exchange                          | Ex_gluc       |           |                | Exchange          | gluc[e] <==>                            | -999999     | 999999      |                |
| 4 Lactate Exchange                          | Ex_lac        |           |                | Exchange          | lac[e] <==>                             | -999999     | 999999      |                |
| 5 Pyruvate Exchange                         | Ex_pyr        |           |                | Exchange          | pyr[e] <==>                             | 0           | 0           |                |
| 6 Palmitate Exchange                        | Ex_pal        |           |                | Exchange          | pal[e] <==>                             | -999999     | 999999      |                |
| 7 Propanoate Input                          | Ex_prop       |           |                | Exchange          | prop[e] <==>                            | 0           | 0           |                |
| 8 Butanoate Input                           | Ex_but        |           |                | Exchange          | but[e] <==>                             | 0           | 0           |                |
| 9 Pentanoate Input                          | Ex_5c         |           |                | Exchange          | 5c-fa[e] <==>                           | 0           | 0           |                |
| 10 Hexanoate Input                          | Ex_6c         |           |                | Exchange          | 6c-fa[e] <==>                           | 0           | 0           |                |
| 11 Octanoate Input                          | Ex_8c         |           |                | Exchange          | 8c-fa[e] <==>                           | 0           | 0           |                |
| 12 Nonanoate Input                          | Ex_9c         |           |                | Exchange          | 9c-fa[e] <==>                           | 0           | 0           |                |
| 13 Decanoate Input                          | Ex_10c        |           |                | Exchange          | 10c-fa[e] <==>                          | 0           | 0           |                |
| 14 Dodecanoate Input                        | Ex_12c        |           |                | Exchange          | 12c-fa[e] <==>                          | 0           | 0           |                |
| 15 Tetradecanoate Input                     | Ex_14c        |           |                | Exchange          | 14c-fa[e] <==>                          | 0           | 0           |                |
| 16 Octadecanoate Input                      | Ex_18c        |           |                | Exchange          | 18c-fa[e] <==>                          | 0           | 0           |                |
| 17 Glycerol Input                           | Ex_glyc       |           |                | Exchange          | glyc[e] <==>                            | 0           | 0           |                |
| 18 Triacylglycerol Exchange                 | Ex_tag        |           |                | Exchange          | tag[e] <==>                             | 0           | 0           |                |
| 19 Diacylglycerol Exchange                  | Ex_dag        |           |                | Exchange          | 12dag[e] <==>                           | 0           | 0           |                |
| 20 Monoacylglycerol Exchange                | Ex_mag        |           |                | Exchange          | 1mag[e] <==>                            | 0           | 0           |                |
| 21 Alpha-ketoglutarate Exchange             | Ex_akg        |           |                | Exchange          | akg[e] -->                              | -999999     | 999999      |                |
| 22 Oxaloacetate Exchange                    | Ex_oaa        |           |                | Exchange          | oaa[e] -->                              | -999999     | 999999      |                |
| 23 Ribose Nutrient                          | Ex_rib        |           | Extracellular  | Exchange          | rib[e] <==>                             | 0           | 0           |                |
| 24 Oxygen Input                             | Nut_o2        |           |                | Nutrient          | o2 <==>                                 | -999999     | 999999      |                |
| 25 Carbon Dioxide Input                     | Nut_co2       |           |                | Nutrient          | co2 <==>                                | -999999     | 999999      |                |
| 26 Water Nutrient                           | Nut_h2o       |           |                | Nutrient          | h2o <==>                                | -999999     | 999999      |                |
| 27 Phosphate Nutrient                       | Nut_p         |           |                | Nutrient          | p <==>                                  | -999999     | 999999      |                |
| 28 Bicarbonate                              | Nut_hco3      |           |                | Nutrient          | hco3 <==>                               | -999999     | 999999      |                |
| 29 Coenzyme A                               | Nut_coa       |           |                | Nutrient          | coa[e] <==>                             | -999999     | 999999      |                |
| 30 Carnitine                                | Nut_carn      |           |                | Nutrient          | carn[e] <==>                            | 0           | 999999      |                |
| 31 Folate Nutrient                          | Nut_dhf       |           |                | Nutrient          | dhf[c] <==>                             | -999999     | 999999      |                |
| 32 lipoprotein lipase                       | LPL           | 3.1.1.34  | extracellular  | mer Fatty Acid    | tag[e] + h2o --> pal[e] + 12dag[e]      | 0           | 999999      |                |
| 33 diacylglycerol lipase                    | DAGL          | 3.1.1.-   | extracellular  | mer Fatty Acid    | 12dag[e] + h2o --> 2mag[e] + pal[e]     | 0           | 999999      |                |
| 34 triacylglycerol degradation              | 12DAG         |           | extracellular  | mer Fatty Acid    | 2mag[e] <==> 1mag[e]                    | 0           | 999999      |                |
| 35 monoacylglycerol lipase                  | MAGL          | 3.1.1.23  | extracellular  | mer Fatty Acid    | 1mag[e] + h2o --> glyc[e] + pal[e]      | 0           | 999999      |                |
| 36 Glucose Input                            | GLUT4         |           |                | Cellular Uptake   | insulin[e] + gluc[e] --> gluc[c]        | 0           | 999999      |                |
| 37 Lactate Input                            | MCT4          |           |                | Cellular Uptake   | lac[e] <==> lac[c]                      | 0           | 999999      |                |
| 38 Pyruvate Uptake                          | MCT_pyr       |           |                | Cellular Uptake   | pyr[e] --> pyr[c]                       | 0           | 999999      |                |
| 39 Palmitate Input (hexadecanoate)          | FAT-CD36      |           |                | Cellular Uptake   | pal[e] --> pal[c]                       | 0           | 999999      |                |
| 40 Propanoate Input                         | FATprop       |           |                | Cellular Uptake   | prop[e] <==> prop[c]                    | 0           | 0           |                |
| 41 Butanoate Input                          | FATbut        |           |                | Cellular Uptake   | but[e] <==> but[c]                      | 0           | 0           |                |
| 42 Pentanoate Input                         | FAT5c         |           |                | Cellular Uptake   | 5c-fa[e] <==> 5c-fa[c]                  | 0           | 0           |                |
| 43 Hexanoate Input                          | FAT6c         |           |                | Cellular Uptake   | 6c-fa[e] <==> 6c-fa[c]                  | 0           | 0           |                |
| 44 Octanoate Input                          | FAT8c         |           |                | Cellular Uptake   | 8c-fa[e] <==> 8c-fa[c]                  | 0           | 0           |                |
| 45 Nonanoate Input                          | FAT9c         |           |                | Cellular Uptake   | 9c-fa[e] <==> 9c-fa[c]                  | 0           | 0           |                |
| 46 Decanoate Input                          | FAT10c        |           |                | Cellular Uptake   | 10c-fa[e] <==> 10c-fa[c]                | 0           | 0           |                |
| 47 Dodecanoate Input                        | FAT12c        |           |                | Cellular Uptake   | 12c-fa[e] <==> 12c-fa[c]                | 0           | 0           |                |
| 48 Tetradecanoate Input                     | FAT14c        |           |                | Cellular Uptake   | 14c-fa[e] <==> 14c-fa[c]                | 0           | 0           |                |
| 49 Octadecanoate Input                      | FAT18c        |           |                | Cellular Uptake   | 18c-fa[e] <==> 18c-fa[c]                | 0           | 0           |                |
| 50 Glycerol Input                           | Alc_glyc      |           |                | Cellular Uptake   | glyc[e] <==> glyc[c]                    | 0           | 0           |                |
| 51 Coenzyme A Transport                     | COA           |           |                | Cellular Uptake   | coa[e] --> coa[c]                       | 0           | 999999      |                |
| 52 Solute Carrier family 22 member 5        | SLC22A5-OCTN2 | transport | Outer membranc | Cellular Uptake   | carn[e] <==> carn[c]                    | 0           | 999999      |                |
| 53 Ribose Membrane Transport                | Xport_rib     |           | Membrane       | Cellular Uptake   | rib[e] --> rib[c]                       | 0           | 999999      |                |
| 54 alpha-ketoglutarate drain                | Dr_akg        |           |                | Cellular Export   | akg[c] --> akge[e]                      | 0           | 999999      |                |
| 55 Oxaloacetate drain                       | Dr_oaa        |           |                | Cellular Export   | oaa[c] --> oaa[e]                       | 0           | 999999      |                |
| 56 Hexokinase                               | Hex           | 2.7.1.2   | Cytosolic      | Glycolysis        | atp + gluc[c] --> adp + p + g6p[c]      | 0           | 999999      | IR             |
| 57 Phosphoglucisomerase                     | PGI           | 5.3.1.9   | Cytosolic      | Glycolysis        | g6p[c] <==> f6p[c]                      | -999999     | 999999      |                |
| 58 Phosphofructokinase                      | PFK           | 2.7.1.11  | Cytosolic      | Glycolysis        | atp + f6p[c] --> adp + fbp[c]           | 0           | 999999      | IR             |
| 59 Fructosebisphosphatase                   | FBP           | 3.1.3.13  | Cytosolic      | Glycolysis        | fbp[c] + h2o --> f6p[c] + p             | 0           | 999999      | IR             |
| 60 Aldolase                                 | Ald           | 4.1.2.13  | Cytosolic      | Glycolysis        | fbp[c] <==> dhap[c] + g3p[c]            | -999999     | 999999      |                |
| 61 Triose-P-isomerase                       | TPI           | 5.3.1.1   | Cytosolic      | Glycolysis        | g3p[c] <==> dhap[c]                     | 0           | 999999      | IR             |
| 62 Glyceraldehyde-3-phosphate dehydrogenase | D3PDeh        | 1.2.1.12  | Cytosolic      | Glycolysis        | g3p[c] + nad[c] <==> dpg[c] + nadh[c]   | -999999     | 999999      |                |
| 63 Phosphoglycerate kinase                  | PGK           | 2.7.2.3   | Cytosolic      | Glycolysis        | dpg[c] + adp <==> 3pg[c] + atp          | 0           | 999999      | IR             |
| 64 Phosphoglycerate mutase                  | PGM           | 5.4.2.1   | Cytosolic      | Glycolysis        | 3pg[c] <==> 2pg[c]                      | -999999     | 999999      |                |
| 65 Enolase                                  | Eno           | 4.2.1.11  | Cytosolic      | Glycolysis        | 2pg[c] <==> pep[c] + h2o                | -999999     | 999999      |                |
| 66 Pyruvate kinase                          | PyrK          | 2.7.1.40  | Cytosolic      | Glycolysis        | pep[c] + adp --> pyr[c] + atp           | 0           | 999999      | IR             |
| 67 PEP synthase                             | PEPSynth      | 2.7.9.2   | Cytosolic      | Glycolysis        | pyr[c] + atp + h2o --> pep[c] + amp + p | 0           | 999999      | IR             |

| 0 Enzyme                                                       | Abrev           | EC Number | Location         | Pathway                  | Reaction                                                             | Lower Bound | Upper Bound | Thermodynamics |
|----------------------------------------------------------------|-----------------|-----------|------------------|--------------------------|----------------------------------------------------------------------|-------------|-------------|----------------|
| 68 PEP carboxy kinase                                          | PEPCarbK        | 4.1.1.49  | Cytosolic        | Glycolysis               | oaa[c] + atp --> co2 + pep[c] + adp                                  | 0           | 999999      | IR             |
| 69 PEP carboxylase                                             | PEPCarbI        | 4.1.1.31  | Cytosolic        | Glycolysis               | oaa[c] + p --> pep[c] + h2o + co2                                    | 0           | 999999      | IR             |
| 70 Lactate dehydrogenase                                       | LacDeh          | 1.1.2.4   | Cytosolic        | Glycolysis               | lac[c] + nad[c] <=> pyr[c] + nadh[c]                                 | -999999     | 999999      |                |
| 71 Malatate dehydrogenase (isozyme)                            | MalDehC         |           | Cytosolic        | Shuttle Cytosolic        | oaa[c] + nadh[c] <=> mal[c] + nad[c]                                 | -999999     | 999999      |                |
| 72 Aspartate aminotransferase                                  | ASTC            |           | Cytosolic        | Shuttle Cytosolic        | asp[c] + akgl[c] <=> glu[c] + oaa[c]                                 | -999999     | 999999      |                |
| 73 Cytosolic glycerol-3-P-dehydrogenase                        | G3PDehC         | 1.1.1.8   | Cytosolic        | Shuttle Cytosolic        | dhap[c] + nadh[c] <=> gly3p[c] + nad[c]                              | -999999     | 999999      |                |
| 74 Malate-alpha-ketoglutarate exchange                         | Mal-AKGEX       |           | Mitochondrion T1 | Shuttle Mitochondrial    | mal[c] + akgl[m] <=> mal[m] + akgl[c]                                | -999999     | 999999      |                |
| 75 Glutamate-aspartate exchange                                | Glu-AspEx       |           | Mitochondrion T1 | Shuttle Mitochondrial    | asp[m] + glu[c] <=> asp[c] + glu[m]                                  | -999999     | 999999      |                |
| 76 Pyruvate Transport (MCT)                                    | MCT             |           | Mitochondrion T1 | TCA                      | pyr[c] --> pyr[m]                                                    | -999999     | 999999      |                |
| 77 Aspartate aminotransferase                                  | ASTM            | 2.6.1.1   | Mitochondrion    | Shuttle Mitochondrial    | glu[m] + oaa[m] <=> asp[m] + akgl[m]                                 | -999999     | 999999      |                |
| 78 Mitochondrial glycerol-3-P-dehydrogenase                    | G3PDehM         | 1.1.95.5  | Mitochondrion    | Shuttle Mitochondrial    | glyc3p[m] + fad[m] <=> dhap[m] + fadh2[m]                            | -999999     | 999999      |                |
| 79 Pyruvate synthase                                           | PyrSynth        | 1.2.4.1   | Mitochondrion    | TCA                      | pyr[m] + coa[m] + nad[m] --> acetyl-coa[m] + nadh[m] + co2           | 0           | 999999      | IR             |
| 80 Citrate synthase                                            | CitSynth        | 2.3.3.1   | Mitochondrion    | TCA                      | oaa[m] + acetyl-coa[m] + h2o <=> cit[m] + coa[m]                     | -999999     | 999999      | R              |
| 81 Aconitase                                                   | Acon            | 4.2.1.3   | Mitochondrion    | TCA                      | cit[m] <=> iso[m]                                                    | -999999     | 999999      | R              |
| 82 Isocitrate dehydrogenase                                    | IsoDeh          | 1.1.1.41  | Mitochondrion    | TCA                      | iso[m] + nad[m] --> akgl[m] + co2 + nadh[m]                          | 0           | 999999      | IR             |
| 83 Isocitrate dehydrogenase                                    | IsoDehnadph     | 1.1.1.42  | Mitochondrion    | TCA                      | iso[m] + nadp[m] --> akgl[m] + co2 + nadph[m]                        | 0           | 999999      | IR             |
| 84 alpha-Ketoglutarate dehydrogenase                           | AKGDeh          | 1.2.4.2   | Mitochondrion    | TCA                      | akgl[m] + coa[m] + nad[m] --> suc-coa[m] + co2 + nadh[m]             | 0           | 999999      | IR             |
| 85 Succinyl-CoA synthetase                                     | SunCoaSynth     | 6.2.1.5   | Mitochondrion    | TCA                      | suc-coa[m] + adp + p <=> suc[m] + coa[m] + atp                       | -999999     | 999999      | R              |
| 86 Succinate dehydrogenase (complex II)                        | SucDeh-II       | 1.3.99.1  | Mitochondrion    | TCA                      | suc[c] + fad[m] <=> fum[m] + fadh2[m]                                | -999999     | 999999      | R              |
| 87 Fumarase                                                    | Fum             | 4.2.1.2   | Mitochondrion    | TCA                      | fum[m] <=> mal[m] + h2o                                              | -999999     | 999999      | R              |
| 88 Malatate dehydrogenase (isozyme)                            | MalDehM         | 1.1.1.37  | Mitochondrion    | TCA                      | mal[m] + nad[m] <=> oaa[m] + nadh[m]                                 | -999999     | 999999      | R              |
| 89 NADH dehydrogenase (complex I)                              | NADHDeh-I       | 1.6.5.3   | Mitochondrion    | Electron Transport Chain | nadh[m] + uq[m] --> nad[m] + uqh2[m] + 4 h[out]                      | 0           | 999999      | IR             |
| 90 Electron transfer flavoprotein-ubiquinone oxidoreductase    | ETFUO           | 1.5.5.1   | Mitochondrion    | Electron Transport Chain | fadh2[m] + uq[m] --> fad[m] + uqh2[m]                                | 0           | 999999      | IR             |
| 91 Ubiquinone cytochrome c-oxidoreductase (complex III)        | UCytC-III       | 1.10.2.2  | Mitochondrion    | Electron Transport Chain | 2 rcytC[m] + uqh2[m] --> 2 rcytC[m] + uq[m] + 4 h[out]               | 0           | 999999      | IR             |
| 92 Cytochrome c-oxidase (complex IV)                           | CytCO-IV        | 1.9.3.1   | Mitochondrion    | Electron Transport Chain | o2 + 4 rcytC[m] --> 2 h2o + 4 rcytC[m] + 8 h[out]                    | 0           | 999999      | IR             |
| 93 ATP synthase (complex V)                                    | ATPSynth-V      | 3.6.3.14  | Mitochondrion    | Electron Transport Chain | adp + p + 4 h[out] <=> atp + h2o                                     | 0           | 999999      | IR             |
| 94 Convert Amp to Adp                                          | AMP_ADPSupply   |           | Mitochondrion    | Electron Transport Chain | amp + p <=> adp                                                      | -999999     | 999999      | R              |
| 95 Palmitate thio kinase                                       | PalTK           | 6.2.1.3   | Cytosolic        | Mitochondrial Transport  | pal[c] + coa[c] + atp --> 234pal-coa[c] + 2 p + amp                  | 0           | 999999      |                |
| 96 Carnitine palmitoyltransferase mitochondrial muscle isoform | CPT1B-CHKL      | 2.3.1.21  | outer mitochond  | Mitochondrial Transport  | carn[c] + 234pal-coa[c] <=> pal-carn[c] + coa[c]                     | 0           | 999999      |                |
| 97 Mitochondrial carnitine/acylcarnitine carrier protein       | SLC25A20-CACT   | transport |                  | Mitochondrial Transport  | pal-carn[c] + carn[m] --> carn[c] + pal-carn[m]                      | 0           | 999999      |                |
| 98                                                             | CPT2            | 2.3.1.21  |                  | Fatty Acid               | pal-carn[m] + coa[m] --> 234pal-coa[m] + carn[m]                     | 0           | 999999      |                |
| 99 Acyl-CoA dehydrogenase                                      | AcylCoADeh      | 1.3.99.3  | Mitochondrion    | Fatty Acid               | 234pal-coa[m] + fad[m] --> fadh2[m] + 23pal-coa[m]                   | 0           | 999999      |                |
| 100 Enoyl-CoA hydratase                                        | EnoCoADeh       | 4.2.1.17  | Mitochondrion    | Fatty Acid               | 23pal-coa[m] + h2o <=> 3ohpal-coa[m]                                 | -999999     | 999999      |                |
| 101 3-Hydroxyacyl-CoA dehydrogenase                            | 3HA-CoADeh      | 1.1.1.35  | Mitochondrion    | Fatty Acid               | 3ohpal-coa[m] + nad[m] <=> 3ketopal-coa[m] + nadh[m]                 | -999999     | 999999      |                |
| 102 Acyl-CoA acetyltransferase                                 | AcylCoAAT       | 2.3.1.16  | Mitochondrion    | Fatty Acid               | 3ketopal-coa[m] + coa[m] --> 14c-234acyl-coa[m] + acetyl-coa[m]      | 0           | 999999      |                |
| 103 Acyl-CoA dehydrogenase                                     | AcylCoADeh-18-c | 1.3.99.3  | Mitochondrion    | Fatty Acid               | 18c-234acyl-coa[m] + fad[m] --> 18c-t2enoyl-coa[m] + fadh2[m]        | 0           | 999999      |                |
| 104 Enoyl-CoA hydratase                                        | EnoCoADeh-18c   | 4.2.1.17  | Mitochondrion    | Fatty Acid               | 18c-t2enoyl-coa[m] + h2o <=> 18c-3ohacyl-coa[m]                      | -999999     | 999999      |                |
| 105 3-Hydroxyacyl-CoA dehydrogenase                            | 3HA-CoADeh-18c  | 1.1.1.35  | Mitochondrion    | Fatty Acid               | 18c-3ohacyl-coa[m] + nad[m] <=> 18c-3ketoacyl-coa[m] + nadh[m]       | -999999     | 999999      |                |
| 106 Acyl-CoA acetyltransferase                                 | AcylCoAAT-18c   | 2.3.1.16  | Mitochondrion    | Fatty Acid               | 18c-3ketoacyl-coa[m] + coa[m] --> 234pal-coa[m] + acetyl-coa[m]      | 0           | 999999      |                |
| 107 Acyl-CoA dehydrogenase                                     | AcylCoADeh-14c  | 1.3.99.3  | Mitochondrion    | Fatty Acid               | 14c-234acyl-coa[m] + fad[m] --> 14c-t2enoyl-coa[m] + fadh2[m]        | 0           | 999999      |                |
| 108 Enoyl-CoA hydratase                                        | EnoCoADeh-14c   | 4.2.1.17  | Mitochondrion    | Fatty Acid               | 14c-t2enoyl-coa[m] + h2o <=> 14c-3ohacyl-coa[m]                      | -999999     | 999999      |                |
| 109 3-Hydroxyacyl-CoA dehydrogenase                            | 3HA-CoADeh-14c  | 1.1.1.35  | Mitochondrion    | Fatty Acid               | 14c-3ohacyl-coa[m] + nad[m] <=> 14c-3ketoacyl-coa[m] + nadh[m]       | -999999     | 999999      |                |
| 110 Acyl-CoA acetyltransferase                                 | AcylCoAAT-14c   | 2.3.1.16  | Mitochondrion    | Fatty Acid               | 14c-3ketoacyl-coa[m] + coa[m] --> 12c-234acyl-coa[m] + acetyl-coa[m] | 0           | 999999      |                |
| 111 Acyl-CoA dehydrogenase                                     | AcylCoADeh-12-c | 1.3.99.3  | Mitochondrion    | Fatty Acid               | 12c-234acyl-coa[m] + fad[m] --> 12c-t2enoyl-coa[m] + fadh2[m]        | 0           | 999999      |                |
| 112 Enoyl-CoA hydratase                                        | EnoCoADeh-12c   | 4.2.1.17  | Mitochondrion    | Fatty Acid               | 12c-t2enoyl-coa[m] + h2o <=> 12c-3ohacyl-coa[m]                      | -999999     | 999999      |                |
| 113 3-Hydroxyacyl-CoA dehydrogenase                            | 3HA-CoADeh-12c  | 1.1.1.35  | Mitochondrion    | Fatty Acid               | 12c-3ohacyl-coa[m] + nad[m] <=> 12c-3ketoacyl-coa[m] + nadh[m]       | -999999     | 999999      |                |
| 114 Acyl-CoA acetyltransferase                                 | AcylCoAAT-12c   | 2.3.1.16  | Mitochondrion    | Fatty Acid               | 12c-3ketoacyl-coa[m] + coa[m] --> 10c-234acyl-coa[m] + acetyl-coa[m] | 0           | 999999      |                |
| 115 Acyl-CoA dehydrogenase                                     | AcylCoADeh-10-c | 1.3.99.3  | Mitochondrion    | Fatty Acid               | 10c-234acyl-coa[m] + fad[m] --> 10c-t2enoyl-coa[m] + fadh2[m]        | 0           | 999999      |                |
| 116 Enoyl-CoA hydratase                                        | EnoCoADeh-10c   | 4.2.1.17  | Mitochondrion    | Fatty Acid               | 10c-t2enoyl-coa[m] + h2o <=> 10c-3ohacyl-coa[m]                      | -999999     | 999999      |                |
| 117 3-Hydroxyacyl-CoA dehydrogenase                            | 3HA-CoADeh-10c  | 1.1.1.35  | Mitochondrion    | Fatty Acid               | 10c-3ohacyl-coa[m] + nad[m] <=> 10c-3ketoacyl-coa[m] + nadh[m]       | -999999     | 999999      |                |
| 118 Acyl-CoA acetyltransferase                                 | AcylCoAAT-10c   | 2.3.1.16  | Mitochondrion    | Fatty Acid               | 10c-3ketoacyl-coa[m] + coa[m] --> 8c-234acyl-coa[m] + acetyl-coa[m]  | 0           | 999999      |                |
| 119 Acyl-CoA dehydrogenase                                     | AcylCoADeh-8-c  | 1.3.99.3  | Mitochondrion    | Fatty Acid               | 8c-234acyl-coa[m] + fad[m] --> 8c-t2enoyl-coa[m] + fadh2[m]          | 0           | 999999      |                |
| 120 Enoyl-CoA hydratase                                        | EnoCoADeh-8c    | 4.2.1.17  | Mitochondrion    | Fatty Acid               | 8c-t2enoyl-coa[m] + h2o <=> 8c-3ohacyl-coa[m]                        | -999999     | 999999      |                |
| 121 3-Hydroxyacyl-CoA dehydrogenase                            | 3HA-CoADeh-8c   | 1.1.1.35  | Mitochondrion    | Fatty Acid               | 8c-3ohacyl-coa[m] + nad[m] <=> 8c-3ketoacyl-coa[m] + nadh[m]         | -999999     | 999999      |                |
| 122 Acyl-CoA acetyltransferase                                 | AcylCoAAT-8c    | 2.3.1.16  | Mitochondrion    | Fatty Acid               | 8c-3ketoacyl-coa[m] + coa[m] --> 6c-234acyl-coa[m] + acetyl-coa[m]   | 0           | 999999      |                |
| 123 Acyl-CoA dehydrogenase                                     | AcylCoADeh-6-c  | 1.3.99.3  | Mitochondrion    | Fatty Acid               | 6c-234acyl-coa[m] + fad[m] --> 6c-t2enoyl-coa[m] + fadh2[m]          | 0           | 999999      |                |
| 124 Enoyl-CoA hydratase                                        | EnoCoADeh-6c    | 4.2.1.17  | Mitochondrion    | Fatty Acid               | 6c-t2enoyl-coa[m] + h2o <=> 6c-3ohacyl-coa[m]                        | -999999     | 999999      |                |
| 125 3-Hydroxyacyl-CoA dehydrogenase                            | 3HA-CoADeh-6c   | 1.1.1.35  | Mitochondrion    | Fatty Acid               | 6c-3ohacyl-coa[m] + nad[m] <=> 6c-3ketoacyl-coa[m] + nadh[m]         | -999999     | 999999      |                |
| 126 Acyl-CoA acetyltransferase                                 | AcylCoAAT-6c    | 2.3.1.16  | Mitochondrion    | Fatty Acid               | 6c-3ketoacyl-coa[m] + coa[m] --> butyryl-coa[m] + acetyl-coa[m]      | 0           | 999999      |                |
| 127 Butyryl-coa Dehydrogenase                                  | ButyrylCoADeh   | 1.3.99.2  | Mitochondrion    | Fatty Acid               | butyryl-coa[m] + fad[m] --> tbut2enoyl-coa[m] + fadh2[m]             | 0           | 999999      |                |
| 128 Enoyl-CoA hydratase                                        | EnoCoADeh-But   | 4.2.1.17  | Mitochondrion    | Fatty Acid               | tbut2enoyl-coa[m] + h2o <=> 3ohbutyryl-coa[m]                        | -999999     | 999999      |                |
| 129 3-Hydroxyacyl-CoA dehydrogenase                            | 3HA-CoADeh-But  | 1.1.1.35  | Mitochondrion    | Fatty Acid               | 3ohbutyryl-coa[m] + coa[m] <=> acetoacetyl-coa[m]                    | -999999     | 999999      |                |
| 130 Acyl-CoA acetyltransferase                                 | AcylCoAAT-But   | 2.3.1.9   | Mitochondrion    | Fatty Acid               | acetoacetyl-coa[m] --> 2 acetyl-coa[m]                               | 0           | 999999      |                |
| 131 Glycerol Kinase                                            | GK              | 2.7.1.30  |                  | TAG                      | glyc[c] + atp <=> gly3p[c] + adp                                     | 0           | 999999      | IR             |
| 132 Glycerol-3-phosphate acyltransferase 4                     | GPAT4           | 2.3.1.15  |                  | TAG                      | glyc3p[c] + 234pal-coa[c] <=> 1acyl-g3p[c] + coa[c]                  | -999999     | 999999      | R              |
| 133 1-acylglycerol-3-phosphate O-acyltransferase               | ABHD5           | 2.3.1.51  |                  | TAG                      | 1acyl-g3p[c] + 234pal-coa[c] <=> 12dacyl-g3p[c] + coa[c]             | -999999     | 999999      | R              |
| 134 Diacylglycerol Kinase zeta                                 | DAGZ-DAGK6      | 2.7.1.107 |                  | TAG                      | 12dacyl-g3p[c] + adp <=> 12dag[c] + atp                              | -999999     | 999999      | R              |

| 0 Enzyme                                                        | Abrev         | EC Number     | Location        | Pathway                 | Reaction                                                           | Lower Bound | Upper Bound | Thermodynamics |
|-----------------------------------------------------------------|---------------|---------------|-----------------|-------------------------|--------------------------------------------------------------------|-------------|-------------|----------------|
| 135 diacylglycerol acyl transferase                             | DGAT1         | 2.3.1.20      |                 | TAG                     | 12dag[c] + 234pal-coa[c] <==> tag[c] + coa[c]                      | -999999     | 999999      | R              |
| 136 Store TAG                                                   | St_TAG        |               |                 | TAG                     | tag[c] -->                                                         | 0           | 999999      | IR             |
| 137 Acyl-coenzyme A synthetase                                  | ACAS2         | 6.2.1.1/6.2.1 | Cellular        | Fatty Acid              | prop[c] + atp + coa[c] --> prop-coa[c] + adp + p                   | 0           | 999999      |                |
| 138 Acyl-coenzyme A synthetase                                  | ACSM-But      | 6.2.1.2       | Cellular        | Fatty Acid              | but[c] + atp + coa[c] --> butyryl-coa[c] + adp + p                 | 0           | 999999      |                |
| 139 Acyl-coenzyme A synthetase                                  | ASCM-5c       | 6.2.1.2       | Cellular        | Fatty Acid              | 5c-fa[c] + atp + coa[c] --> 5c-234acyl-coa[c] + adp + p            | 0           | 999999      |                |
| 140 Acyl-coenzyme A synthetase                                  | ASCM-6c       | 6.2.1.3       | Cellular        | Fatty Acid              | 6c-fa[c] + atp + coa[c] --> 6c-234acyl-coa[c] + adp + p            | 0           | 999999      |                |
| 141 Acyl-coenzyme A synthetase                                  | ACSM-8c       | 6.2.1.4       | Cellular        | Fatty Acid              | 8c-fa[c] + atp + coa[c] --> 8c-234acyl-coa[c] + adp + p            | 0           | 999999      |                |
| 142 Acyl-coenzyme A synthetase                                  | ACSM-9c       | 6.2.1.5       | Cellular        | Fatty Acid              | 9c-fa[c] + atp + coa[c] --> 9c-234acyl-coa[c] + adp + p            | 0           | 999999      |                |
| 143 Acyl-coenzyme A synthetase                                  | ACSM-10c      | 6.2.1.6       | Cellular        | Fatty Acid              | 10c-fa[c] + atp + coa[c] --> 10c-234acyl-coa[c] + adp + p          | 0           | 999999      |                |
| 144 Acyl-coenzyme A synthetase                                  | ACSM-12c      | 6.2.1.7       | Cellular        | Fatty Acid              | 12c-fa[c] + atp + coa[c] --> 12c-234acyl-coa[c] + adp + p          | 0           | 999999      |                |
| 145 Acyl-coenzyme A synthetase                                  | ACSM-14c      | 6.2.1.8       | Cellular        | Fatty Acid              | 14c-fa[c] + atp + coa[c] --> 14c-234acyl-coa[c] + adp + p          | 0           | 999999      |                |
| 146 Acyl-coenzyme A synthetase                                  | ACSM-18c      | 6.2.1.8       | Cellular        | Fatty Acid              | 18c-fa[c] + atp + coa[c] --> 18c-234acyl-coa[c] + adp + p          | 0           | 999999      |                |
| 147 Carnitine palmitoyltransferase mitochondrial muscle isoform | CPT1B-CHKL    | 2.3.1.21      | outer mitochond | Mitochondrial Transport | prop-coa[c] + carn[c] --> prop-carn[c] + coa[c]                    | 0           | 999999      |                |
| 148 Carnitine palmitoyltransferase mitochondrial muscle isoform | CPT1B-CHKL    | 2.3.1.21      | outer mitochond | Mitochondrial Transport | butyryl-coa[c] + carn[c] --> butyryl-carn[c] + coa[c]              | 0           | 999999      |                |
| 149 Carnitine palmitoyltransferase mitochondrial muscle isoform | CPT1B-CHKL    | 2.3.1.21      | outer mitochond | Mitochondrial Transport | 5c-234acyl-coa[c] + carn[c] --> 5c-234acyl-carn[c] + coa[c]        | 0           | 999999      |                |
| 150 Carnitine palmitoyltransferase mitochondrial muscle isoform | CPT1B-CHKL    | 2.3.1.21      | outer mitochond | Mitochondrial Transport | 6c-234acyl-coa[c] + carn[c] --> 6c-234acyl-carn[c] + coa[c]        | 0           | 999999      |                |
| 151 Carnitine palmitoyltransferase mitochondrial muscle isoform | CPT1B-CHKL    | 2.3.1.21      | outer mitochond | Mitochondrial Transport | 8c-234acyl-coa[c] + carn[c] --> 8c-234acyl-carn[c] + coa[c]        | 0           | 999999      |                |
| 152 Carnitine palmitoyltransferase mitochondrial muscle isoform | CPT1B-CHKL    | 2.3.1.21      | outer mitochond | Mitochondrial Transport | 9c-234acyl-coa[c] + carn[c] --> 9c-234acyl-carn[c] + coa[c]        | 0           | 999999      |                |
| 153 Carnitine palmitoyltransferase mitochondrial muscle isoform | CPT1B-CHKL    | 2.3.1.21      | outer mitochond | Mitochondrial Transport | 10c-234acyl-coa[c] + carn[c] --> 10c-234acyl-carn[c] + coa[c]      | 0           | 999999      |                |
| 154 Carnitine palmitoyltransferase mitochondrial muscle isoform | CPT1B-CHKL    | 2.3.1.21      | outer mitochond | Mitochondrial Transport | 12c-234acyl-coa[c] + carn[c] --> 12c-234acyl-carn[c] + coa[c]      | 0           | 999999      |                |
| 155 Carnitine palmitoyltransferase mitochondrial muscle isoform | CPT1B-CHKL    | 2.3.1.21      | outer mitochond | Mitochondrial Transport | 14c-234acyl-coa[c] + carn[c] --> 14c-234acyl-carn[c] + coa[c]      | 0           | 999999      |                |
| 156 Carnitine palmitoyltransferase mitochondrial muscle isoform | CPT1B-CHKL    | 2.3.1.21      | outer mitochond | Mitochondrial Transport | 18c-234acyl-coa[c] + carn[c] --> 18c-234acyl-carn[c] + coa[c]      | 0           | 999999      |                |
| 157 Mitochondrial carnitine/acylcarnitine carrier protein       | SLC25A20-CACT | transport     | Mitochondrial M | Mitochondrial Transport | prop-carn[c] + carn[m] --> prop-carn[m] + carn[c]                  | 0           | 999999      |                |
| 158 Mitochondrial carnitine/acylcarnitine carrier protein       | SLC25A20-CACT | transport     | Mitochondrial M | Mitochondrial Transport | butyryl-carn[c] + carn[m] --> butyryl-carn[m] + carn[c]            | 0           | 999999      |                |
| 159 Mitochondrial carnitine/acylcarnitine carrier protein       | SLC25A20-CACT | transport     | Mitochondrial M | Mitochondrial Transport | 5c-234acyl-carn[c] + carn[m] --> 5c-234acyl-carn[m] + carn[c]      | 0           | 999999      |                |
| 160 Mitochondrial carnitine/acylcarnitine carrier protein       | SLC25A20-CACT | transport     | Mitochondrial M | Mitochondrial Transport | 6c-234acyl-carn[c] + carn[m] --> 6c-234acyl-carn[m] + carn[c]      | 0           | 999999      |                |
| 161 Mitochondrial carnitine/acylcarnitine carrier protein       | SLC25A20-CACT | transport     | Mitochondrial M | Mitochondrial Transport | 8c-234acyl-carn[c] + carn[m] --> 8c-234acyl-carn[m] + carn[c]      | 0           | 999999      |                |
| 162 Mitochondrial carnitine/acylcarnitine carrier protein       | SLC25A20-CACT | transport     | Mitochondrial M | Mitochondrial Transport | 9c-234acyl-carn[c] + carn[m] --> 9c-234acyl-carn[m] + carn[c]      | 0           | 999999      |                |
| 163 Mitochondrial carnitine/acylcarnitine carrier protein       | SLC25A20-CACT | transport     | Mitochondrial M | Mitochondrial Transport | 10c-234acyl-carn[c] + carn[m] --> 10c-234acyl-carn[m] + carn[c]    | 0           | 999999      |                |
| 164 Mitochondrial carnitine/acylcarnitine carrier protein       | SLC25A20-CACT | transport     | Mitochondrial M | Mitochondrial Transport | 12c-234acyl-carn[c] + carn[m] --> 12c-234acyl-carn[m] + carn[c]    | 0           | 999999      |                |
| 165 Mitochondrial carnitine/acylcarnitine carrier protein       | SLC25A20-CACT | transport     | Mitochondrial M | Mitochondrial Transport | 14c-234acyl-carn[c] + carn[m] --> 14c-234acyl-carn[m] + carn[c]    | 0           | 999999      |                |
| 166 Mitochondrial carnitine/acylcarnitine carrier protein       | SLC25A20-CACT | transport     | Mitochondrial M | Mitochondrial Transport | 18c-234acyl-carn[c] + carn[m] --> 18c-234acyl-carn[m] + carn[c]    | 0           | 999999      |                |
| 167                                                             | CPT2          | 2.3.1.21      |                 | Mitochondrial Transport | prop-carn[m] + coa[m] --> prop-coa[m] + carn[m]                    | 0           | 999999      |                |
| 168                                                             | CPT2          | 2.3.1.21      |                 | Mitochondrial Transport | butyryl-carn[m] + coa[m] --> butyryl-coa[m] + carn[m]              | 0           | 999999      |                |
| 169                                                             | CPT2          | 2.3.1.21      |                 | Mitochondrial Transport | 5c-234acyl-carn[m] + coa[m] --> 5c-234acyl-coa[m] + carn[m]        | 0           | 999999      |                |
| 170                                                             | CPT2          | 2.3.1.21      |                 | Mitochondrial Transport | 6c-234acyl-carn[m] + coa[m] --> 6c-234acyl-coa[m] + carn[m]        | 0           | 999999      |                |
| 171                                                             | CPT2          | 2.3.1.21      |                 | Mitochondrial Transport | 8c-234acyl-carn[m] + coa[m] --> 8c-234acyl-coa[m] + carn[m]        | 0           | 999999      |                |
| 172                                                             | CPT2          | 2.3.1.21      |                 | Mitochondrial Transport | 9c-234acyl-carn[m] + coa[m] --> 9c-234acyl-coa[m] + carn[m]        | 0           | 999999      |                |
| 173                                                             | CPT2          | 2.3.1.21      |                 | Mitochondrial Transport | 10c-234acyl-carn[m] + coa[m] --> 10c-234acyl-coa[m] + carn[m]      | 0           | 999999      |                |
| 174                                                             | CPT2          | 2.3.1.21      |                 | Mitochondrial Transport | 12c-234acyl-carn[m] + coa[m] --> 12c-234acyl-coa[m] + carn[m]      | 0           | 999999      |                |
| 175                                                             | CPT2          | 2.3.1.21      |                 | Mitochondrial Transport | 14c-234acyl-carn[m] + coa[m] --> 14c-234acyl-coa[m] + carn[m]      | 0           | 999999      |                |
| 176                                                             | CPT2          | 2.3.1.21      |                 | Mitochondrial Transport | 18c-234acyl-carn[m] + coa[m] --> 18c-234acyl-coa[m] + carn[m]      | 0           | 999999      |                |
| 177 Acyl-CoA dehydrogenase                                      | AcylCoADeh-9c | 1.3.99.3      | Mitochondrion   | Fatty Acid              | 9c-234acyl-coa[m] + fad[m] --> 9c-t2enoyl-coa[m] + fadh2[m]        | 0           | 999999      |                |
| 178 Enoyl-CoA hydratase                                         | EnoCoADeh-9c  | 4.2.1.17      | Mitochondrion   | Fatty Acid              | 9c-t2enoyl-coa[m] + h2o <==> 9c-3ohacyl-coa[m]                     | -999999     | 999999      |                |
| 179 3-Hydroxyacyl-CoA dehydrogenase                             | 3HA-CoADeh-9c | 1.1.1.35      | Mitochondrion   | Fatty Acid              | 9c-3ohacyl-coa[m] + nad[m] <==> 9c-3ketoacyl-coa[m] + nadh[m]      | -999999     | 999999      |                |
| 180 Acyl-CoA acetyltransferase                                  | AcylCoAAT-9c  | 2.3.1.16      | Mitochondrion   | Fatty Acid              | 9c-3ketoacyl-coa[m] + coa[m] --> 7c-234acyl-coa[m] + acetyl-coa[m] | 0           | 999999      |                |
| 181 Acyl-CoA dehydrogenase                                      | AcylCoADeh-7c | 1.3.99.3      | Mitochondrion   | Fatty Acid              | 7c-234acyl-coa[m] + fad[m] --> 7c-t2enoyl-coa[m] + fadh2[m]        | 0           | 999999      |                |
| 182 Enoyl-CoA hydratase                                         | EnoCoADeh-7c  | 4.2.1.17      | Mitochondrion   | Fatty Acid              | 7c-t2enoyl-coa[m] + h2o <==> 7c-3ohacyl-coa[m]                     | -999999     | 999999      |                |
| 183 3-Hydroxyacyl-CoA dehydrogenase                             | 3HA-CoADeh-7c | 1.1.1.35      | Mitochondrion   | Fatty Acid              | 7c-3ohacyl-coa[m] + nad[m] <==> 7c-3ketoacyl-coa[m] + nadh[m]      | -999999     | 999999      |                |
| 184 Acyl-CoA acetyltransferase                                  | AcylCoAAT-7c  | 2.3.1.16      | Mitochondrion   | Fatty Acid              | 7c-3ketoacyl-coa[m] + coa[m] --> 5c-234acyl-coa[m] + acetyl-coa[m] | 0           | 999999      |                |
| 185 Acyl-CoA dehydrogenase                                      | AcylCoADeh-5c | 1.3.99.3      | Mitochondrion   | Fatty Acid              | 5c-234acyl-coa[m] + fad[m] --> 5c-t2enoyl-coa[m] + fadh2[m]        | 0           | 999999      |                |
| 186 Enoyl-CoA hydratase                                         | EnoCoADeh-5c  | 4.2.1.17      | Mitochondrion   | Fatty Acid              | 5c-t2enoyl-coa[m] + h2o <==> 5c-3ohacyl-coa[m]                     | -999999     | 999999      |                |
| 187 3-Hydroxyacyl-CoA dehydrogenase                             | 3HA-CoADeh-5c | 1.1.1.35      | Mitochondrion   | Fatty Acid              | 5c-3ohacyl-coa[m] + nad[m] <==> 5c-3ketoacyl-coa[m] + nadh[m]      | -999999     | 999999      |                |
| 188 Acyl-CoA acetyltransferase                                  | AcylCoAAT-5c  | 2.3.1.16      | Mitochondrion   | Fatty Acid              | 5c-3ketoacyl-coa[m] + coa[m] --> acetyl-coa[m] + prop-coa[m]       | 0           | 999999      |                |
| 189 Alcohol Dehydrogenase (NADP)                                | AKR1A1        | 1.1.1.2       | Cytosolic       | Fatty Alcohol           | glyc[c] + nadp[c] --> glyc-ald[c] + nadph[c]                       | 0           | 999999      |                |
| 190 Fatty aldehyde dehydrogenase                                | ALDH3A2       | 1.2.1.3       | Cytosolic       | Fatty Alcohol           | glyc-ald[c] + nad[c] + h2o --> glyc-ate[c] + nadh[c]               | 0           | 999999      |                |
| 191 Glycerate Kinase                                            | GLYCK         | 2.7.1.31      | Cytosolic       | Fatty Alcohol           | glyc-ate[c] + atp --> 3pg[c] + adp + p                             | 0           | 999999      |                |
| 192                                                             | EAA_arg       |               |                 | Exchange                | arg[c] <==>                                                        | -999999     | 0           |                |
| 193                                                             | EAA_his       |               |                 | Exchange                | his[c] <==>                                                        | -999999     | 0           |                |
| 194                                                             | EAA_ile       |               |                 | Exchange                | ile[c] <==>                                                        | -999999     | 0           |                |
| 195                                                             | EAA_leu       |               |                 | Exchange                | leu[c] <==>                                                        | -999999     | 0           |                |
| 196                                                             | EAA_lys       |               |                 | Exchange                | lys[c] <==>                                                        | -999999     | 0           |                |
| 197                                                             | EAA_met       |               |                 | Exchange                | met[c] <==>                                                        | -999999     | 0           |                |
| 198                                                             | EAA_phe       |               |                 | Exchange                | phe[c] <==>                                                        | -999999     | 0           |                |
| 199                                                             | EAA_thr       |               |                 | Exchange                | thr[c] <==>                                                        | -999999     | 0           |                |
| 200                                                             | EAA_trp       |               |                 | Exchange                | trp[c] <==>                                                        | -999999     | 0           |                |
| 201                                                             | EAA_val       |               |                 | Exchange                | val[c] <==>                                                        | -999999     | 0           |                |

| 0 Enzyme | Abrev                                                                          | EC Number             | Location      | Pathway                  | Reaction                                                                   | Lower Bound | Upper Bound | Thermodynamics |
|----------|--------------------------------------------------------------------------------|-----------------------|---------------|--------------------------|----------------------------------------------------------------------------|-------------|-------------|----------------|
| 202      | NEAA_ala                                                                       |                       |               | Exchange                 | ala[c] <=>                                                                 | -999999     | 0           |                |
| 203      | NEAA_asn                                                                       |                       |               | Exchange                 | asn[c] <=>                                                                 | -999999     | 0           |                |
| 204      | NEAA_asp                                                                       |                       |               | Exchange                 | asp[c] <=>                                                                 | -999999     | 0           |                |
| 205      | NEAA_cys                                                                       |                       |               | Exchange                 | cys[c] <=>                                                                 | -999999     | 0           |                |
| 206      | NEAA_glu                                                                       |                       |               | Exchange                 | glu[c] <=>                                                                 | -999999     | 0           |                |
| 207      | NEAA_gln                                                                       |                       |               | Exchange                 | gln[c] <=>                                                                 | -999999     | 0           |                |
| 208      | NEAA_gly                                                                       |                       |               | Exchange                 | gly[c] <=>                                                                 | -999999     | 0           |                |
| 209      | NEAA_pro                                                                       |                       |               | Exchange                 | pro[c] <=>                                                                 | -999999     | 0           |                |
| 210      | NEAA_ser                                                                       |                       |               | Exchange                 | ser[c] <=>                                                                 | -999999     | 0           |                |
| 211      | NEAA_tyr                                                                       |                       |               | Exchange                 | tyr[c] <=>                                                                 | -999999     | 0           |                |
| 212      | Dihydropolyl dehydrogenase, mitochondrial                                      | DLDH 1.8.1.4          | Mitochondrion | Amino Acid Catabolism    | laN6dhpl[m] + nad[m] <=> laN6ll[m] + nadh[m]                               | -999999     | 999999      |                |
| 213      | Valine mitochondrial transport                                                 | MT_val                |               | Mitochondrial Transport  | val[c] --> val[m]                                                          | 0           | 999999      |                |
| 214      | Branched-chain amino acid aminotransferase, mitochondrial precursor            | BCAT2-val 2.6.1.42    | Mitochondrion | Amino Acid Catabolism    | val[m] + akg[m] --> akisov[m] + glu[m]                                     | 0           | 999999      |                |
| 215      | Oxoisovalerate dehydrogenase                                                   | BCKDHB-val 1.2.4.4    | Mitochondrion | Amino Acid Catabolism    | akisov[m] + laN6ll[m] --> laN6S2mpdhpl[m] + co2                            | 0           | 999999      |                |
| 216      | Lipoamide acyltransferase component of branched-chain alpha-ke                 | BCKADE2-val 2.3.1.168 | Mitochondrion | Amino Acid Catabolism    | laN6S2mpdhpl[m] + coa[m] --> laN6dhpl[m] + isob-coa[m]                     | 0           | 999999      |                |
| 217      | Acyl-coa dehydrogenase, mitochondrial precursor                                | ACADSB 1.3.99.12      | Mitochondrion | Amino Acid Catabolism    | isob-coa[m] + fad[m] --> methacr1-coa[m] + fadh2[m]                        | 0           | 999999      |                |
| 218      | Enoyl-coa hydratase, mitochondrial precursor                                   | ECHS1 4.2.1.17        | Mitochondrion | Amino Acid Catabolism    | methacr1-coa[m] + h2o --> 3hisob-coa[m]                                    | 0           | 999999      |                |
| 219      | 3-hydroxyisobutyryl-coenzyme A hydrolase                                       | HIBCH 3.1.2.4         | Mitochondrion | Amino Acid Catabolism    | 3hisob-coa[m] + h2o --> 3hisob[m] + coa[m]                                 | 0           | 999999      |                |
| 220      | 3-hydroxyisobutyrate dehydrogenase, mitochondrial precursor                    | HIBADH 1.1.1.31       | Mitochondrion | Amino Acid Catabolism    | 3hisob[m] + nad[m] --> methalmesemald[m] + nadh[m]                         | 0           | 999999      |                |
| 221      | Methylmalonate-semialdehyde dehydrogenase (acylating), mitochondrial precursor | ALDH6A1 1.2.1.27      | Mitochondrion | Amino Acid Catabolism    | methalmesemald[m] + nad[m] + coa[m] + h2o --> prop-coa[m] + hco3 + nadh[m] | 0           | 999999      |                |
| 222      | Propionyl-coa carboxylase                                                      | PCCB 6.4.1.3          | Mitochondrion | Amino Acid Catabolism    | prop-coa[m] + atp + hco3 --> Smethmal-coa[m] + adp + p                     | 0           | 999999      |                |
| 223      | Methylmalonyl-coa epimerase                                                    | MCEE 5.1.99.1         | Mitochondrion | Amino Acid Catabolism    | Smethmal-coa[m] --> Rmethmal-coa[m]                                        | 0           | 999999      |                |
| 224      | Methylmalonyl-coa mutase, mitochondrial precursor                              | MUT 5.4.99.2          | Mitochondrion | Amino Acid Catabolism    | Rmethmal-coa[m] --> suc-coa[m]                                             | 0           | 999999      |                |
| 225      | Isoleucine mitochondrial transport                                             | MT_ile                |               | Mitochondrial Transport  | ile[c] --> ile[m]                                                          | 0           | 999999      |                |
| 226      | Branched-chain amino acid aminotransferase, mitochondrial precursor            | BCAT-ile 2.3.1.42     | Mitochondrion | Amino Acid Catabolism    | ile[m] + akg[m] --> ak3mvalt[m] + glu[m]                                   | 0           | 999999      |                |
| 227      | Oxoisovalerate dehydrogenase                                                   | BCKDHB-ile 1.2.4.4    | Mitochondrion | Amino Acid Catabolism    | ak3mvalt[m] + laN6ll[m] --> eN6S2mbdhp[m] + co2                            | 0           | 999999      |                |
| 228      | Lipoamide acyltransferase component of branched-chain alpha-ke                 | BCKADE2-ile 2.3.1.168 | Mitochondrion | Amino Acid Catabolism    | eN6S2mbdhp[m] + coa[m] --> laN6dhpl[m] + t2metbut2en-coa[m]                | 0           | 999999      |                |
| 229      | Enoyl Coa hydratase                                                            | ECHS1 4.2.1.17        | Mitochondrion | Amino Acid Catabolism    | t2metbut2en-coa[m] + h2o --> 3oh2metbut-coa[m]                             | 0           | 999999      |                |
| 230      | Hydroxysteroid dehydrogenase 10                                                | HSD17B10_ 1.1.1.178   | Mitochondrion | Amino Acid Catabolism    | 3oh2metbut-coa[m] + nad[m] --> 2met-acetoacetyl-coa[m] + nadh[m]           | 0           | 999999      |                |
| 231      | Acetyl-coa acetyltransferase, mitochondrial                                    | ACAT1 2.3.1.9         | Mitochondrion | Amino Acid Catabolism    | 2met-acetoacetyl-coa[m] + coa[m] --> prop-coa[m] + acetyl-coa[m]           | 0           | 999999      |                |
| 232      | Isoleucine mitochondrial transport                                             | MT_leu                |               | Mitochondrial Transport  | leu[c] --> leu[m]                                                          | 0           | 999999      |                |
| 233      | Branched-chain amino acid aminotransferase, mitochondrial precursor            | BCAT2-leu 2.6.1.42    | Mitochondrion | Amino Acid Catabolism    | leu[m] + akg[m] --> akiso[m] + glu[m]                                      | 0           | 999999      |                |
| 234      | Oxoisovalerate dehydrogenase                                                   | BCKDHB-leu 1.2.4.4    | Mitochondrion | Amino Acid Catabolism    | akiso[m] + laN6ll[m] --> eN6S3mbdhp[m] + co2                               | 0           | 999999      |                |
| 235      | Lipoamide acyltransferase component of branched-chain alpha-ke                 | BCKADE2-leu 2.3.1.168 | Mitochondrion | Amino Acid Catabolism    | eN6S3mbdhp[m] + coa[m] --> laN6dhpl[m] + isov-coa[m]                       | 0           | 999999      |                |
| 236      | Isovaleryl-coa dehydrogenase, mitochondrial precursor                          | IVD 1.3.99.10         | Mitochondrion | Amino Acid Catabolism    | isov-coa[m] + fad[m] --> 3mc-coa[m] + fadh2[m]                             | 0           | 999999      |                |
| 237      | Methylcrotonyl-coa carboxylase                                                 | MCC1-MCC2 6.4.1.4     | Mitochondrion | Amino Acid Catabolism    | 3mc-coa[m] + atp + hco3 --> 3mg-coa[m] + adp + p                           | 0           | 999999      |                |
| 238      | Methylglutaconyl-CoA hydratase, mitochondrial                                  | MGCA 4.2.1.18         | Mitochondrion | Amino Acid Catabolism    | 3mg-coa[m] + h2o --> 3h3mg-coa[m]                                          | 0           | 999999      |                |
| 239      | Hydroxymethylglutaryl-coa lyase, mitochondrial precursor                       | HMGCL 4.1.3.4         | Mitochondrion | Amino Acid Catabolism    | 3h3mg-coa[m] --> acetacet[m] + acetyl-coa[m]                               | 0           | 999999      |                |
| 240      | Succinyl-coa: 3-keoacid-coanezyme A transferase, mitochondrial precursor       | HOXA10 2.8.3.5        | Mitochondrion | Amino Acid Catabolism    | acetacet[m] + suc-coa[m] --> suc[m] + acetoacetyl-coa[m]                   | 0           | 999999      |                |
| 241      | Hydroxymethylglutaryl-coa synthase, mitochondrial precursor                    | HMGCS2 2.3.3.10       | Mitochondrion | Amino Acid Catabolism    | acetoacetyl-coa[m] + acetyl-coa[m] + h2o --> 3h3mg-coa[m] + coa[m]         | 0           | 999999      |                |
| 242      | Glutamate Dehydrogenase                                                        | GLUDH 1.4.1.3         | Mitochondrion | Amino Acid Catabolism    | glu[m] + nadp[m] + h2o <=> akg[m] + nadph[m] + nh3                         | -999999     | 999999      | R              |
| 243      | Glutamine Synthetase                                                           | GlnSynth 6.3.1.2      | Cytosolic     | Amino Acid Biosynthesis  | nh3 + glu[c] + atp --> gln[c] + adp + p                                    | 0           | 999999      | IR             |
| 244      | Glutamin (nitrogen) elimination in muscle                                      | GLN_Elim              | Cytosolic     | Cellular Export          | gln[c] -->                                                                 | 0           | 999999      | IR             |
| 245      | Alanine amino transferase 2                                                    | ALT 2.6.1.2           | Cytosolic     | Amino Acid Biosynthesis  | glu[c] + pyr[c] <=> akg[c] + ala[c]                                        | -999999     | 999999      | R              |
| 246      | Alanine nitrogen elimination in muscle                                         | ALA_Elim              | Cytosolic     | Cellular Export          | ala[c] -->                                                                 | 0           | 999999      | IR             |
| 247      | Serine Dehydratase                                                             | SDS 4.3.1.17          | Cytosolic     | Amino Acid Catabolism    | ser[c] --> pyr[c] + nh3                                                    | 0           | 999999      |                |
| 248      | Cystathionine beta-synthase                                                    | CBS 4.2.1.22          | Cytosolic     | Amino Acid Catabolism    | ser[c] + hcys[c] --> cyst[c] + h2o                                         | 0           | 999999      |                |
| 249      | Cystathionine gamma-lyase                                                      | CTH 4.4.1.1           | Cytosolic     | Amino Acid Catabolism    | cyst[c] + h2o --> nh3 + cys[c] + 2ob[c]                                    | 0           | 999999      |                |
| 250      | ILVB                                                                           | ILVBL 2.2.1.6         | Cytosolic     | Amino Acid Catabolism    | pyr[c] + 2ob[c] --> 2a2hbut[c] + co2                                       | 0           | 999999      |                |
| 251      | 2-aceto-2-hydroxybutyrate Leak                                                 | 2a2hButLeak           |               | Cellular Export          | 2a2hbut[c] -->                                                             | 0           | 999999      |                |
| 252      | Lysine mitochondrial transport                                                 | MT_lys                |               | Amino Acid Mit Transport | lys[c] --> lys[m]                                                          | 0           | 999999      |                |
| 253      | Lysine-ketoglutarate reductase/saccharopine dehydrogenase                      | AASS 1.5.1.7          | Mitochondrion | Amino Acid Catabolism    | lys[m] + akg[m] + nadh[m] <=> sacpn[m] + nad[m] + h2o                      | 0           | 999999      |                |
| 254      | Lysine-ketoglutarate reductase/saccharopine dehydrogenase                      | AASS 1.5.1.9          | Mitochondrion | Amino Acid Catabolism    | sacpn[m] + nad[m] + h2o <=> 2aap6semald[m] + glu[m] + nadh[m]              | 0           | 999999      |                |
| 255      | Lysine-ketoglutarate reductase/saccharopine dehydrogenase                      | aAASADeh 1.2.1.31     | Mitochondrion | Amino Acid Catabolism    | 2aap6semald[m] + nad[m] + h2o <=> aaap[m] + nadh[m]                        | 0           | 999999      |                |
| 256      | L-kynurenine/alpha-aminoadipate aminotransferase                               | KATII 2.6.1.39        | Mitochondrion | Amino Acid Catabolism    | aaap[m] + akg[m] <=> glu[m] + akap[m]                                      | 0           | 999999      |                |
| 257      | lysdeg                                                                         | lysdeg                | Mitochondrion | Amino Acid Catabolism    | akap[m] + nad[m] + coa[m] <=> glut-coa[m] + nadh[m] + co2                  | 0           | 999999      |                |
| 258      | Glutaryl-coa Dehydrogenase, mitochondrial precursor                            | IVD 1.3.99.7          | Mitochondrion | Amino Acid Catabolism    | glut-coa[m] + fad[m] <=> tbut2enoyl-coa[m] + fadh2[m]                      | 0           | 999999      |                |
| 259      | Poline oxidase, mitochondrial precursor                                        | MT_pro                |               | Amino Acid Mit Transport | pro[c] --> pro[m]                                                          | 0           | 999999      |                |
| 260      | Aldehyde dehydrogenase 4A1 precursor                                           | PRODH 1.5.99.8        | Mitochondrion | Amino Acid Catabolism    | pro[m] + fad[m] --> 1pyrr5carb[m] + fadh2[m]                               | 0           | 999999      |                |
| 261      | Aldehyde dehydrogenase 4A1 precursor                                           | ALDH4a1 1.5.1.12      | Mitochondrion | Amino Acid Catabolism    | 1pyrr5carb[m] + nad[m] + 2 h2o --> glu[m] + nadh[m]                        | 0           | 999999      | IR             |
| 262      | glycine amidinotransferase, Mitochondrial Precursor                            | GATM 2.1.4.1          | Mitochondrion | Amino Acid Catabolism    | gly[c] + arg[c] --> guan[c] + orn[m]                                       | 0           | 999999      | committed step |
| 263      | ornithine leak                                                                 | Dr_orn                |               | Cellular Export          | orn[m] -->                                                                 | 0           | 999999      |                |
| 264      | Guanidinoacetate N-methyltransferase                                           | GAMT 2.1.1.2          | Cytosolic     | Amino Acid Catabolism    | guan[c] + sal-met[c] --> cr + sal-hcys[c]                                  | 0           | 999999      |                |
| 265      | Adenosylhomocysteinase                                                         | Dr_cr                 |               | Cellular Export          | cr -->                                                                     | 0           | 999999      |                |
| 266      | Adenosylhomocysteinase                                                         | AdoHcyase 3.3.1.1     |               | Amino Acid Biosynthesis  | sal-hcys[c] + h2o --> hcys[c] + amp                                        | 0           | 999999      |                |
| 267      | 5-methyltetrahydrofolate-homocysteine-methyltransferase                        | MTR 2.1.1.13          | Cytosolic     | Amino Acid Biosynthesis  | hcys[c] + 5meth-thf[c] <=> met[c] + thf[c]                                 | -999999     | 999999      |                |
| 268      | S-adenosylmethionine synthetase                                                | AdoMet 2.5.1.6        |               | Amino Acid Biosynthesis  | atp + met[c] + h2o --> sal-met[c] + 2 p                                    | 0           | 999999      |                |

| 0 Enzyme                                          | Abrev        | EC Number | Location      | Pathway                 | Reaction                                                                          | Lower Bound | Upper Bound | Thermodynamics |
|---------------------------------------------------|--------------|-----------|---------------|-------------------------|-----------------------------------------------------------------------------------|-------------|-------------|----------------|
| 269 Serine hydroxymethyltransferase               | SHMT         | 2.1.2.1   | Cytosolic     | Amino Acid Biosynthesis | ser[c] + thf[c] <=> gly[c] + 5methyln-thf[c]                                      | -999999     | 999999      | R              |
| 270 Methylenetetrahydrofolate reductase           | MTHFR        | 1.5.1.20  | Cytosolic     | Vitamin Metabolism      | 5methyln-thf[c] + nadph[c] --> 5meth-thf[c] + nadp[c]                             | 0           | 999999      | R              |
| 271 Dihydrofolate Reductase                       | DHFR         | 1.5.1.3   | Cytosolic     | Vitamin Metabolism      | dhf[c] + nadph[c] --> thf[c] + nadp[c]                                            | 0           | 999999      | IR             |
| 272 Histidine Ammonia-lyase                       | HAL          | 4.3.1.3   | Cytosolic     | Amino Acid Catabolism   | his[c] --> uro[c] + nh3                                                           | 0           | 999999      | IR             |
| 273 Probable urocanate hydratase                  | FLI31300     | 4.2.1.49  | Cytosolic     | Amino Acid Catabolism   | uro[c] + h2o --> 4im5prop[c]                                                      | 0           | 999999      | IR             |
| 274 Unknown                                       | MGC35366     | 3.5.2.7   | Cytosolic     | Amino Acid Catabolism   | 4im5prop[c] + h2o --> form-glu[c]                                                 | 0           | 999999      | IR             |
| 275 Formimidoyltransferase-cyclodeaminase, pt 1   | FTCD1        | 2.1.2.5   | Cytosolic     | Amino Acid Catabolism   | form-glu[c] + thf[c] --> glu[c] + form-thf[c]                                     | 0           | 999999      | IR             |
| 276 Formimidoyltransferase-cyclodeaminase, pt 2   | FTCD2        | 4.3.1.4   | Cytosolic     | Vitamin Metabolism      | form-thf[c] <=> 5methn-thf[c] + nh3                                               | -999999     | 999999      | R              |
| 277 Folate Transformation                         | FT           | 1.5.1.15  | Cytosolic     | Vitamin Metabolism      | 5methn-thf[c] + nadh[c] <=> 5methyln-thf[c] + nad[c]                              | -999999     | 999999      | R              |
| 278 Asparaginase (asparagine amidohydrolase)      | ASNase       | 3.5.1.1   | Cytosolic     | Amino Acid Biosynthesis | asn[c] + h2o --> asp[c] + nh3                                                     | 0           | 999999      | IR             |
| 279 Asparagine synthetase (glutamine-hydrolyzing) | ASNSynth     | 6.3.5.4   | Cytosolic     | Amino Acid Biosynthesis | gln[c] + asp[c] + atp + h2o --> glu[c] + asn[c] + amp + 2 p                       | 0           | 999999      | R              |
| 280 Phosphoglycerate dehydrogenase                | PHGDH        | 1.1.1.95  | Cytosolic     | Amino Acid Biosynthesis | 3pg[c] + nad[c] --> 3phdpyr[c] + nadh[c]                                          | 0           | 999999      | IR             |
| 281 Phosphoserine aminotransferase                | PSA          | 2.6.1.52  | Cytosolic     | Amino Acid Biosynthesis | 3phdpyr[c] + glu[c] --> 3pser[c] + akgl[c]                                        | 0           | 999999      | IR             |
| 282 Phosphoserine phosphatase                     | PSPH         | 3.1.3.3   | Cytosolic     | Amino Acid Biosynthesis | 3pser[c] + h2o --> ser[c] + p                                                     | 0           | 999999      | IR             |
| 283 Glutamate 5-kinase                            | P5CS         | 2.7.2.11  | Mitochondrion | Amino Acid Biosynthesis | glu[m] + atp --> glu-5-p[m] + adp + p                                             | 0           | 999999      |                |
| 284 Gamma-glutamyl phosphate reductase            | PYCS         | 1.2.1.41  | Mitochondrion | Amino Acid Biosynthesis | glu-5-p[m] + nadph[m] --> glu-5-semald[m] + nadp[m]                               | 0           | 999999      |                |
| 285 Spontaneous                                   | Spont_Glu    |           | Mitochondrion | Amino Acid Biosynthesis | glu-5-semald[m] --> 1pyrr5carb[m] + h2o                                           | 0           | 999999      |                |
| 286 Pyrroline 5-carboxylate reductase             | PYRCR1       | 1.5.1.2   | Mitochondrion | Amino Acid Biosynthesis | 1pyrr5carb[m] + nadph[m] --> pro[m] + nadp[m]                                     | 0           | 999999      | IR             |
| 287 Phenylalanine-4-hydroxylase                   | PAG          | 1.14.16.1 | Cytosolic     | Amino Acid Biosynthesis | phe[c] + thb[c] --> tyr[c] + 4ah-thb[c]                                           | 0           | 999999      | IR             |
| 288 Pterin-4-alpha-carinolamine dehydratase       | PCBD         | 4.2.1.96  | Cytosolic     | Amino Acid Biosynthesis | 4ah-thb[c] --> dhb[c] + h2o                                                       | 0           | 999999      | IR             |
| 289 Dihydropterin Reductase                       | QDPR         | 1.5.1.34  | Cytosolic     | Amino Acid Biosynthesis | dhb[c] + nadh[c] --> thb[c] + nad[c]                                              | 0           | 999999      | IR             |
| 290                                               | MT_glu       |           |               | Mitochondrial Transport | glu[m] <=> glu[c]                                                                 | -999999     | 999999      |                |
| 291                                               | tRNA         |           |               | Nutrient                | trna[c] <=>                                                                       | -999999     | 999999      |                |
| 292 Tyrosyl-tRNA synthetase                       | YARS         | 6.1.1.1   |               | Translation             | trna[c] + tyr[c] + atp <=> trna-tyr[c] + amp + 2 p                                | -999999     | 999999      | R              |
| 293 Tryptophanyl-tRNA synthetase                  | WARS         | 6.1.1.2   |               | Translation             | trna[c] + trp[c] + atp <=> trna-trp[c] + amp + 2 p                                | -999999     | 999999      | R              |
| 294 Threonyl-tRNA Synthetase                      | TARS         | 6.1.1.3   |               | Translation             | trna[c] + thr[c] + atp <=> trna-thr[c] + amp + 2 p                                | -999999     | 999999      | R              |
| 295 Leucyl-tRNA Synthetase                        | LARS         | 6.1.1.4   |               | Translation             | trna[c] + leu[c] + atp <=> trna-leu[c] + amp + 2 p                                | -999999     | 999999      | R              |
| 296 Isoleucyl-tRNA Synthetase                     | IARS         | 6.1.1.5   |               | Translation             | trna[c] + ile[c] + atp <=> trna-ile[c] + amp + 2 p                                | -999999     | 999999      | R              |
| 297 Lysyl-tRNA Synthetase                         | KARS         | 6.1.1.6   |               | Translation             | trna[c] + lys[c] + atp <=> trna-lys[c] + amp + 2 p                                | -999999     | 999999      | R              |
| 298 Alanyl-tRNA Synthetase                        | AARS         | 6.1.1.7   |               | Translation             | trna[c] + ala[c] + atp <=> trna-ala[c] + amp + 2 p                                | -999999     | 999999      | R              |
| 299 Valyl-tRNA Synthetase                         | VARS         | 6.1.1.9   |               | Translation             | trna[c] + val[c] + atp <=> trna-val[c] + amp + 2 p                                | -999999     | 999999      | R              |
| 300 Methionyl-tRNA Synthetase                     | MARS         | 6.1.1.10  |               | Translation             | trna[c] + met[c] + atp <=> trna-met[c] + amp + 2 p                                | -999999     | 999999      | R              |
| 301 Seryl-tRNA Synthetase                         | SARS         | 6.1.1.11  |               | Translation             | trna[c] + ser[c] + atp <=> trna-ser[c] + amp + 2 p                                | -999999     | 999999      | R              |
| 302 Aspartyl-tRNA Synthetase                      | DARS         | 6.1.1.12  |               | Translation             | trna[c] + asp[c] + atp <=> trna-asp[c] + amp + 2 p                                | -999999     | 999999      | R              |
| 303 Glycyl-tRNA Synthetase                        | GARS         | 6.1.1.14  |               | Translation             | trna[c] + gly[c] + atp <=> trna-gly[c] + amp + 2 p                                | -999999     | 999999      | R              |
| 304 Prolyl-tRNA Synthetase                        | PARS         | 6.1.1.15  |               | Translation             | trna[c] + pro[c] + atp <=> trna-pro[c] + amp + 2 p                                | -999999     | 999999      | R              |
| 305 Cysteinyl-tRNA Synthetase                     | CARS         | 6.1.1.16  |               | Translation             | trna[c] + cys[c] + atp <=> trna-cys[c] + amp + 2 p                                | -999999     | 999999      | R              |
| 306 Glutamyl-tRNA Synthetase                      | EPRS         | 6.1.1.17  |               | Translation             | trna[c] + glu[c] + atp <=> trna-glu[c] + amp + 2 p                                | -999999     | 999999      | R              |
| 307 Glutaminyl-tRNA Synthetase                    | QARS         | 6.1.1.18  |               | Translation             | trna[c] + gln[c] + atp <=> trna-gln[c] + amp + 2 p                                | -999999     | 999999      | R              |
| 308 Arginyl-tRNA Synthetase                       | RARS         | 6.1.1.19  |               | Translation             | trna[c] + arg[c] + atp <=> trna-arg[c] + amp + 2 p                                | -999999     | 999999      | R              |
| 309 Phenylalanyl-tRNA Synthetase                  | FARS         | 6.1.1.20  |               | Translation             | trna[c] + phe[c] + atp <=> trna-phe[c] + amp + 2 p                                | -999999     | 999999      | R              |
| 310 Histidyl-tRNA Synthetase                      | HARS         | 6.1.1.21  |               | Translation             | trna[c] + his[c] + atp <=> trna-his[c] + amp + 2 p                                | -999999     | 999999      | R              |
| 311 Asparaginyl-tRNA Synthetase                   | NARS         | 6.1.1.22  |               | Translation             | trna[c] + asn[c] + atp <=> trna-asn[c] + amp + 2 p                                | -999999     | 999999      | R              |
| 312 Actin Synthesis                               | ACT          | 4501881   |               | Protein Synthesis       | 29 trna-ala[c] + 6 trna-cys[c] + 22 trna-asp[c] + 28 trna-glu[c] + 12 trna-phe[c] | 0           | 999999      | IR             |
| 313 Myosin Heavy Chain type 1 and 2x muscle fiber | MYOHC1-2x    | 115527082 |               | Protein Synthesis       | 171 trna-ala[c] + 17 trna-cys[c] + 98 trna-asp[c] + 261 trna-glu[c] + 56 trna-pf  | 0           | 999999      | IR             |
| 314 Myosin Heavy Chain type 2a muscle fiber       | MYOHC2a      | 153792663 |               | Protein Synthesis       | 172 trna-ala[c] + 18 trna-cys[c] + 93 trna-asp[c] + 265 trna-glu[c] + 58 trna-pf  | 0           | 999999      | IR             |
| 315 Myosin Heavy Chain type 2b muscle fiber       | MYOHC2b      | 110611903 |               | Protein Synthesis       | 168 trna-ala[c] + 17 trna-cys[c] + 94 trna-asp[c] + 263 trna-glu[c] + 61 trna-pf  | 0           | 999999      | IR             |
| 316 Myosin Light Chain Kinase                     | MYOLCK       | 14993776  |               | Protein Synthesis       | 56 trna-ala[c] + 10 trna-cys[c] + 30 trna-asp[c] + 48 trna-glu[c] + 20 trna-phe   | 0           | 999999      | IR             |
| 317 Myosin Light Chain Phosphorylated             | MYOLCp       | 28372499  |               | Protein Synthesis       | 12 trna-ala[c] + 2 trna-cys[c] + 15 trna-asp[c] + 15 trna-glu[c] + 12 trna-phe    | 0           | 999999      | IR             |
| 318 Myosin type 1 muscle fiber                    | MYO1-2x      |           |               | Polymerizatin           | 2 myoHC1-2x[c] + 2 myoLCK[c] + 2 myoLCP[c] --> myo1[c]                            | 0           | 999999      | IR             |
| 319 Myosin type 2a muscle fiber                   | MYO2a        |           |               | Polymerizatin           | 2 myoHC2a[c] + 2 myoLCK[c] + 2 myoLCP[c] --> myo2a[c]                             | 0           | 999999      | IR             |
| 320 Myosin type 2x muscle fiber                   | MYO2x        |           |               | Polymerizatin           | 2 myoHC1-2x[c] + 2 myoLCK[c] + 2 myoLCP[c] --> myo2x[c]                           | 0           | 999999      | IR             |
| 321 Myosin type 2b muscle fiber                   | MYO2b        |           |               | Polymerizatin           | 2 myoHC2b[c] + 2 myoLCK[c] + 2 myoLCP[c] --> myo2b[c]                             | 0           | 999999      | IR             |
| 322 Tropomyosin type 1 muscle fiber               | TMN1         | 114155140 |               | Protein Synthesis       | 38 trna-ala[c] + 1 trna-cys[c] + 19 trna-asp[c] + 61 trna-glu[c] + 1 trna-phe     | 0           | 999999      | IR             |
| 323 Tropomyosin type 2 muscle fiber               | TMN2         | 114155144 |               | Protein Synthesis       | 28 trna-ala[c] + 3 trna-cys[c] + 14 trna-asp[c] + 54 trna-glu[c] + 1 trna-phe     | 0           | 999999      | IR             |
| 324 Tropomyosin complex for type 1 muscle fibers  | DIM-TMN1     |           |               | Polymerizatin           | 2 tmn1[c] --> dim-tmn1[c]                                                         | 0           | 999999      | IR             |
| 325 Tropomyosin complex for type 2 muscle fibers  | DIM-TMN2     |           |               | Polymerizatin           | 2 tmn2[c] --> dim-tmn2[c]                                                         | 0           | 999999      | IR             |
| 326 Troponin c for type 1 muscle fibers           | TPNC1        | 4507615   |               | Protein Synthesis       | 7 trna-ala[c] + 2 trna-cys[c] + 23 trna-asp[c] + 23 trna-glu[c] + 9 trna-phe      | 0           | 999999      | IR             |
| 327 Troponin c for type 2 muscle fibers           | TPNC2        | 4507617   |               | Protein Synthesis       | 12 trna-ala[c] + 1 trna-cys[c] + 19 trna-asp[c] + 26 trna-glu[c] + 10 trna-phe    | 0           | 999999      | IR             |
| 328 Troponin I for type 1 muscle fibers           | TPNI1        | 56682969  |               | Protein Synthesis       | 15 trna-ala[c] + 3 trna-cys[c] + 10 trna-asp[c] + 22 trna-glu[c] + 2 trna-phe     | 0           | 999999      | IR             |
| 329 Troponin I for type 2 muscle fibers           | TPNI2        | 4507621   |               | Protein Synthesis       | 13 trna-ala[c] + 3 trna-cys[c] + 11 trna-asp[c] + 25 trna-glu[c] + 3 trna-phe     | 0           | 999999      | IR             |
| 330 Troponin T for type 1 muscle fibers           | TPNT1        | 187173288 |               | Protein Synthesis       | 20 trna-ala[c] + 1 trna-cys[c] + 12 trna-asp[c] + 54 trna-glu[c] + 6 trna-phe     | 0           | 999999      | IR             |
| 331 Troponin T for type 2 muscle fibers           | TPNT2        | 5803203   |               | Protein Synthesis       | 24 trna-ala[c] + 18 trna-asp[c] + 49 trna-glu[c] + 4 trna-phe[c] + 9 trna-gly     | 0           | 999999      | IR             |
| 332 Troponin for type 1 muscle fibers             | TPN1         |           |               | Polymerizatin           | tpnc1[c] + tpni1[c] + tpnt1[c] --> tpn1[c]                                        | 0           | 999999      | IR             |
| 333 Troponin for type 2 muscle fibers             | TPN2         |           |               | Polymerizatin           | tpnc2[c] + tpni2[c] + tpnt2[c] --> tpn2[c]                                        | 0           | 999999      | IR             |
| 334 Contractile complex for type 1 muscle fibers  | CONTR-COMP1  |           |               | Polymerizatin           | 7 act[c] + 7 myo1[c] + dim-tmn1[c] + tpn1[c] --> contr-comp1[c]                   | 0           | 999999      | IR             |
| 335 Contractile complex for type 2a muscle fibers | CONTR-COMP2a |           |               | Polymerizatin           | 7 act[c] + 7 myo2a[c] + dim-tmn2[c] + tpn2[c] --> contr-comp2a[c]                 | 0           | 999999      | IR             |

| 0 Enzyme                                              | Abrev            | EC Number          | Location     | Pathway                   | Reaction                                                          | Lower Bound | Upper Bound | Thermodynamics |
|-------------------------------------------------------|------------------|--------------------|--------------|---------------------------|-------------------------------------------------------------------|-------------|-------------|----------------|
| 336 Contractile complex for type 2x muscle fibers     | CONTR-COMP2x     |                    |              | Polymerizatin             | 7 act[c] + 7 myo2x[c] + dim-tmn2[c] + tpn2[c] --> contr-comp2x[c] | 0           | 999999      | IR             |
| 337 Contractile complex for type 2b muscle fibers     | CONTR-COMP2b     |                    |              | Polymerizatin             | 7 act[c] + 7 myo2b[c] + dim-tmn2[c] + tpn2[c] --> contr-comp2b[c] | 0           | 999999      | IR             |
| 338 Storage Contractile complex type 1 muscle fibers  | Str_CONTR-COMP1  |                    |              | Muscle                    | contr-comp1[c] -->                                                | 0           | 999999      | IR             |
| 339 Storage Contractile complex type 2a muscle fibers | Str_CONTR-COMP2a |                    |              | Muscle                    | contr-comp2a[c] -->                                               | 0           | 999999      | IR             |
| 340 Storage Contractile complex type 2x muscle fibers | Str_CONTR-COMP2x |                    |              | Muscle                    | contr-comp2x[c] -->                                               | 0           | 999999      | IR             |
| 341 Storage Contractile complex type 2b muscle fibers | Str_CONTR-COMP2b |                    |              | Muscle                    | contr-comp2b[c] -->                                               | 0           | 999999      | IR             |
| 342 Creatine Kinase, M Chain                          | CKM              | 2.7.3.2            |              | Creatine                  | cr-p + adp <=> cr + atp                                           | -999999     | 999999      | R              |
| 343 Creatine Supply                                   | Spont_CrP        |                    |              | Creatine                  | cr-p <=> cr + p                                                   | -999999     | 999999      | R              |
| 344                                                   | Nut_cr           |                    |              | Creatine                  | cr <=>                                                            | 0           | 999999      | IR             |
| 345 Fake Transfer                                     | ATP2UTP          |                    |              | Glycogen Synthesis 2      | atp --> utp                                                       | 0           | 999999      |                |
| 346 Fake Transfer                                     | UDP2ADP          |                    |              | Glycogen Synthesis        | udp --> adp                                                       | 0           | 999999      |                |
| 347 Phosphoglucomutase                                | PGM1             | 5.4.2.2            |              | Glycogen Synthesis        | g6p[c] <=> g1p[c]                                                 | -999999     | 999999      | IR             |
| 348 UTP-glucose--1-phosphate uridylyltransferase      | UGP2             | 2.7.7.9            |              | Glycogen Synthesis 2      | g1p[c] + utp --> udp-g1p[c] + (2) p                               | -999999     | 999999      |                |
| 349 Modified Glycogenin-1 and 2 for model             | mGYG             | 2.4.1.186/2.4.1.11 |              | Glycogen Synthesis        | udp-g1p[c] <=> glycogen[c] + udp                                  | -999999     | 999999      |                |
| 350 Modified Glycogen Synthase - muscle for the model | mGYS1            |                    |              | Glycogen Synthesis        | glycogen[c] -->                                                   | 0           | 999999      |                |
| 351 glucose-6-phosphate 1-dehydrogenase               | G6PD             | 1.1.1.49           | cytosol      | Pentose Phosphate Pathway | g6p[c] + nadp[c] <=> gluc-lac-6p[c] + nadph[c]                    | -999999     | 999999      |                |
| 352 6-phosphogluconalactonase                         | PGLS             | 3.1.1.31           | cytosol      | Pentose Phosphate Pathway | gluc-lac-6p[c] + h2o <=> 6pgluconate[c]                           | -999999     | 999999      |                |
| 353 6-phosphogluconate dehydrogenase                  | PGD              | 1.1.1.44           | cytosol      | Pentose Phosphate Pathway | 6pgluconate[c] + nadp[c] <=> ru5p[c] + co2 + nadph[c]             | -999999     | 0           |                |
| 354 6-phosphogluconate dehydrogenase                  | PGD              | 1.1.1.44           | cytosol      | Pentose Phosphate Pathway | 6pgluconate[c] + nad[c] <=> ru5p[c] + co2 + nadh[c]               | 0           | 999999      |                |
| 355 ribulose-5-phosphate-3-epimerase                  | RPE              | 5.1.3.1            | cytosol      | Pentose Phosphate Pathway | ru5p[c] <=> x5p[c]                                                | -999999     | 999999      |                |
| 356 ribose-5-phosphate isomerase                      | RPIA             | 5.3.1.6            | cytosol      | Pentose Phosphate Pathway | ru5p[c] <=> r5p[c]                                                | -999999     | 999999      |                |
| 357 transketolase                                     | TKT1             | 2.2.1.1            | cytosol      | Pentose Phosphate Pathway | e4p[c] + x5p[c] <=> f6p[c] + g3p[c]                               | -999999     | 999999      |                |
| 358 transketolase                                     | TKT2             | 2.2.1.1            | cytosol      | Pentose Phosphate Pathway | s7p[c] + g3p[c] <=> r5p[c] + x5p[c]                               | -999999     | 999999      |                |
| 359 transaldolase                                     | TALDO            | 2.2.1.2            | cytosol      | Pentose Phosphate Pathway | s7p[c] + g3p[c] <=> e4p[c] + f6p[c]                               | -999999     | 999999      |                |
| 360 Ribokinase                                        | RBSK             | 2.7.1.15           | cytosol      | Pentose Phosphate Pathway | rib[c] + atp <=> r5p[c] + adp + p                                 | -999999     | 999999      |                |
| 361 Glutamate-cystein Ligase                          | GCL              | 6.3.2.2            | Cytosol      | Glutathione biosynthesis  | cys[c] + glu[c] + atp --> glu-cys[c] + p + adp                    | 0           | 999999      |                |
| 362 Glutathione synthetase                            | GSS              | 6.3.2.3            | Cytosol      | Glutathione biosynthesis  | glu-cys[c] + gly[c] + atp --> glutath[c] + adp + p                | 0           | 999999      |                |
| 363 Glutathione transport                             | glutathport      |                    |              | Mitochondrial Transport   | glutath[c] <=> glutath[m]                                         | -999999     | 999999      |                |
| 364 Glutathione reductase, cellular                   | GSR              | 1.8.1.7            | Cytosol      | Glutathione Redox         | 2 glutath[c] + nadp[c] --> gssg[c] + nadph[c]                     | 0           | 999999      |                |
| 365 Glutathione reductase                             | GSR              | 1.8.1.7            | Mitochondria | Glutathione Redox         | 2 glutath[m] + nadp[m] --> gssg[m] + nadph[m]                     | 0           | 999999      |                |
| 366 Gluathione leak                                   | GlutathLeak      |                    |              | Cellular Export           | gssg[c] -->                                                       | 0           | 999999      |                |
| 367 Gluathione leak                                   | GlutathLeak      |                    |              | Cellular Export           | gssg[m] -->                                                       | 0           | 999999      |                |
| 368                                                   | Acetyl-coaLeak   |                    |              | Cellular Export           | acetyl-coa[m] -->                                                 | 0           | 999999      |                |
