# Supplementary material for: To Supplement or Not to Supplement: A Metabolic Network Framework for Human Nutritional Supplements
Source: PubMed Central journal article supplement (PMC3740736; doi:10.1371/journal.pone.0068751), 2013-08-05
Supplement: pone.0068751.s005.pdf [file pone.0068751.s005.pdf]

| Fasting    | Available | Type 2a  | Single    |            | Double   |
|------------|-----------|----------|-----------|------------|----------|
|            |           | Control  | Methionin | Difference | ile-met  |
| Prot Synth | n/a       | 2.18E-05 | 2.83E-05  | 6.52E-06   | 3.15E-05 |
| ARG        | 0.08      | -0.047   | -0.0604   | -0.0139    | -0.06712 |
| HIS        | 0.082     | -0.016   | -0.0208   | -0.0048    | -0.02313 |
| ILE        | 0.062     | -0.062   | -0.062    | 0.0000     | -0.06894 |
| LEU        | 0.123     | -0.123   | -0.1106   | 0.0124     | -0.123   |
| LYS        | 0.188     | -0.179   | -0.1169   | 0.0620     | -0.13002 |
| MET        | 0.025     | -0.025   | -0.0325   | -0.0075    | -0.03612 |
| PHE        | 0.057     | -0.047   | -0.057    | -0.0099    | -0.057   |
| THR        | 0.14      | -0.047   | -0.0615   | -0.0142    | -0.06841 |
| TRP        | 0.044     | -0.005   | -0.0064   | -0.0015    | -0.00714 |
| VAL        | 0.233     | -0.233   | -0.1466   | 0.0864     | -0.17861 |
| ALA        | 0.333     | -0.333   | -0.333    | 0.0000     | -0.333   |
| ASN        | 0.041     | 0.000    | -0.041    | -0.0410    | -0.041   |
| ASP        | 0.003     | -0.003   | 0         | 0.0030     | 0        |
| CYS        | 0.052     | -0.010   | -0.0134   | -0.0031    | -0.01485 |
| GLU        | 0.024     | -0.024   | -0.024    | 0.0000     | -0.024   |
| GLN        | 0.586     | 0.000    | -0.0717   | -0.0717    | -0.0843  |
| GLY        | 0.23      | -0.047   | -0.0613   | -0.0142    | -0.06812 |
| PRO        | 0.168     | -0.168   | -0.168    | 0.0000     | -0.168   |
| SER        | 0.114     | -0.046   | -0.0157   | 0.0304     | -0.02341 |
| TYR        | 0.059     | 0.000    | -0.0042   | -0.0042    | -0.011   |

| Fasting | Available |        |       |       |       |             |
|---------|-----------|--------|-------|-------|-------|-------------|
|         | 0         | 1 2 HR |       | 3     | 4     | 0-2 hr diff |
| ARG     | 0.061     | 0.098  | 0.120 | 0.106 | 0.092 | 0.059       |
| HIS     | 0.092     | 0.105  | 0.155 | 0.105 | 0.106 | 0.063       |
| ILE     | 0.067     | 0.105  | 0.144 | 0.155 | 0.137 | 0.077       |
| LEU     | 0.14      | 0.205  | 0.271 | 0.282 | 0.247 | 0.131       |
| LYS     | 0.189     | 0.277  | 0.328 | 0.281 | 0.259 | 0.139       |
| MET     |           |        |       |       |       |             |
| PHE     | 0.049     | 0.062  | 0.068 | 0.069 | 0.06  | 0.019       |
| THR     | 0.149     | 0.185  | 0.214 | 0.212 | 0.19  | 0.065       |
| TRP     |           |        |       |       |       |             |
| VAL     | 0.238     | 0.3    | 0.359 | 0.395 | 0.366 | 0.121       |
| ALA     | 0.271     | 0.34   | 0.345 | 0.324 | 0.289 | 0.074       |
| ASN     |           |        |       |       |       |             |
| ASP     | 0.115     | 0.114  | 0.114 | 0.116 | 0.112 | -0.001      |
| CYS     |           |        |       |       |       |             |
| GLU     | 0.145     | 0.148  | 0.152 | 0.148 | 0.149 | 0.007       |
| GLN     | 0.658     | 0.662  | 0.676 | 0.653 | 0.66  | 0.018       |
| GLY     | 0.352     | 0.387  | 0.377 | 0.367 | 0.345 | 0.025       |
| PRO     | 0.179     | 0.223  | 0.231 | 0.227 | 0.211 | 0.052       |
| SER     | 0.118     | 0.209  | 0.217 | 0.197 | 0.183 | 0.099       |
| TYR     | 0.063     | 0.077  | 0.092 | 0.093 | 0.082 | 0.029       |

0.061

|            | Basal   |       |          |         | Postabsorptive |       |      |       |
|------------|---------|-------|----------|---------|----------------|-------|------|-------|
|            | Cynober | Aoki  | Pozefsky | Tessari | AVG            | STD   | Aoki |       |
| <b>ARG</b> | 0.08    | 0.061 | 0.075    | 0.073   | <b>0.072</b>   | 0.008 |      | 0.120 |
| <b>HIS</b> | 0.082   | 0.092 | 0.076    | 0.06    | <b>0.078</b>   | 0.013 |      | 0.155 |
| <b>ILE</b> | 0.062   | 0.067 | 0.056    | 0.053   | <b>0.060</b>   | 0.006 |      | 0.144 |
| <b>LEU</b> | 0.123   | 0.14  | 0.12     |         | <b>0.128</b>   | 0.011 |      | 0.271 |
| <b>LYS</b> | 0.188   | 0.189 | 0.172    | 0.144   | <b>0.173</b>   | 0.021 |      | 0.328 |
| <b>MET</b> | 0.025   |       | 0.021    | 0.014   | <b>0.020</b>   | 0.006 |      |       |
| <b>PHE</b> | 0.057   | 0.049 | 0.049    |         | <b>0.052</b>   | 0.005 |      | 0.068 |
| <b>THR</b> | 0.14    | 0.149 | 0.135    | 0.107   | <b>0.133</b>   | 0.018 |      | 0.214 |
| <b>TRP</b> | 0.044   |       | 0.038    |         | <b>0.041</b>   | 0.004 |      |       |
| <b>VAL</b> | 0.233   | 0.238 | 0.238    | 0.211   | <b>0.230</b>   | 0.013 |      | 0.359 |
| <b>ALA</b> | 0.333   | 0.271 | 0.231    | 0.24    | <b>0.269</b>   | 0.046 |      | 0.345 |
| <b>ASN</b> | 0.041   |       |          | 0.025   | <b>0.033</b>   | 0.011 |      |       |
| <b>ASP</b> | 0.003   | 0.115 |          | 0.016   | <b>0.045</b>   | 0.061 |      | 0.114 |
| <b>CYS</b> | 0.052   |       | 0.086    |         | <b>0.069</b>   | 0.024 |      |       |
| <b>GLU</b> | 0.024   | 0.145 |          | 0.152   | <b>0.107</b>   | 0.072 |      | 0.152 |
| <b>GLN</b> | 0.586   | 0.658 |          | 0.366   | <b>0.537</b>   | 0.152 |      | 0.676 |
| <b>GLY</b> | 0.23    | 0.352 | 0.179    | 0.191   | <b>0.238</b>   | 0.079 |      | 0.377 |
| <b>PRO</b> | 0.168   | 0.179 | 0.178    | 0.215   | <b>0.185</b>   | 0.021 |      | 0.231 |
| <b>SER</b> | 0.114   | 0.118 | 0.107    | 0.109   | <b>0.112</b>   | 0.005 |      | 0.217 |
| <b>TYR</b> | 0.059   | 0.063 | 0.054    | 0.047   | <b>0.056</b>   | 0.007 |      | 0.092 |

| Difference | Triple      |            | Quadruple       |            |
|------------|-------------|------------|-----------------|------------|
|            | Ile-Leu-Met | Difference | Arg-Ile-Leu-Met | Difference |
| 9.69E-06   | 3.75E-05    | 1.57E-05   | 4.18E-05        | 2.00E-05   |
| -0.0206    | -0.080      | -0.0335    | -0.089          | -0.0427    |
| -0.0071    | -0.028      | -0.0116    | -0.031          | -0.0147    |
| -0.0069    | -0.108      | -0.0459    | -0.138          | -0.0757    |
| 0.0000     | -0.147      | -0.0236    | -0.163          | -0.0405    |
| 0.0489     | -0.155      | 0.0239     | -0.173          | 0.0061     |
| -0.0111    | -0.043      | -0.0181    | -0.048          | -0.0230    |
| -0.0099    | -0.057      | -0.0099    | -0.057          | -0.0099    |
| -0.0211    | -0.082      | -0.0342    | -0.091          | -0.0436    |
| -0.0022    | -0.009      | -0.0036    | -0.009          | -0.0046    |
| 0.0544     | -0.206      | 0.0272     | -0.223          | 0.0104     |
| 0.0000     | -0.333      | 0.0000     | -0.333          | 0.0000     |
| -0.0410    | -0.041      | -0.0410    | -0.041          | -0.0410    |
| 0.0030     | 0.000       | 0.0030     | 0.000           | 0.0030     |
| -0.0046    | -0.018      | -0.0074    | -0.020          | -0.0094    |
| 0.0000     | -0.024      | 0.0000     | -0.024          | 0.0000     |
| -0.0843    | -0.108      | -0.1083    | -0.126          | -0.1255    |
| -0.0210    | -0.081      | -0.0341    | -0.091          | -0.0434    |
| 0.0000     | -0.168      | 0.0000     | -0.168          | 0.0000     |
| 0.0227     | -0.046      | -0.0001    | -0.063          | -0.0169    |
| -0.0110    | -0.024      | -0.0241    | -0.033          | -0.0334    |

| Cynober - Aoki | Mixed Meal (Tessari et al) |       |
|----------------|----------------------------|-------|
|                | Basal                      | Meal  |
| 0.019          | 0.073                      | 0.11  |
| -0.01          | 0.06                       | 0.081 |
| -0.005         | 0.053                      | 0.112 |
| -0.017         |                            |       |
| -0.001         | 0.144                      | 0.26  |
|                | 0.014                      | 0.03  |
| 0.008          |                            |       |
| -0.009         | 0.107                      | 0.149 |
| -0.005         | 0.211                      | 0.339 |
| 0.062          | 0.24                       | 0.272 |
|                | 0.025                      | 0.045 |
| -0.112         | 0.016                      | 0.02  |
| -0.121         | 0.152                      | 0.152 |
| -0.072         | 0.366                      | 0.405 |
| -0.122         | 0.191                      | 0.185 |
| -0.011         | 0.215                      | 0.367 |
| -0.004         | 0.109                      | 0.133 |
| -0.004         | 0.047                      | 0.091 |

-0.025

(post insulin)

| Posefsky | Tessari | AVG          | STD   | Diff b/n AVG | %Dif |
|----------|---------|--------------|-------|--------------|------|
|          | 0.11    | <b>0.115</b> | 0.007 | 0.043        | 59%  |
|          | 0.081   | <b>0.118</b> | 0.052 | 0.041        | 52%  |
|          | 0.112   | <b>0.128</b> | 0.023 | 0.069        | 115% |
|          |         | <b>0.271</b> |       | 0.143        | 112% |
|          | 0.26    | <b>0.294</b> | 0.048 | 0.121        | 70%  |
|          | 0.03    | <b>0.030</b> |       | 0.010        | 50%  |
|          |         | <b>0.068</b> |       | 0.016        | 32%  |
|          | 0.149   | <b>0.182</b> | 0.046 | 0.049        | 37%  |
|          |         | <b>0.044</b> |       |              |      |
|          | 0.339   | <b>0.349</b> | 0.014 | 0.119        | 52%  |
|          | 0.272   | <b>0.309</b> | 0.052 | 0.040        | 15%  |
|          | 0.045   | <b>0.045</b> |       | 0.012        | 36%  |
|          | 0.02    | <b>0.067</b> | 0.066 | 0.022        | 50%  |
| 0.093    |         | <b>0.093</b> |       |              |      |
|          | 0.152   | <b>0.152</b> | 0.000 | 0.045        | 42%  |
|          | 0.405   | <b>0.541</b> | 0.192 | 0.004        | 1%   |
|          | 0.185   | <b>0.281</b> | 0.136 | 0.043        | 18%  |
|          | 0.367   | <b>0.299</b> | 0.096 | 0.114        | 62%  |
|          | 0.133   | <b>0.175</b> | 0.059 | 0.063        | 56%  |
|          | 0.091   | <b>0.092</b> | 0.001 | 0.036        | 64%  |

**Quintuple**

| Arg-Ile-Leu-Met-Phe | Difference |
|---------------------|------------|
| 4.55E-05            | 2.37E-05   |
| -0.097              | -0.0505    |
| -0.033              | -0.0174    |
| -0.238              | -0.1763    |
| -0.178              | -0.0549    |
| -0.188              | -0.0091    |
| -0.052              | -0.0272    |
| -0.062              | -0.0149    |
| -0.099              | -0.0516    |
| -0.010              | -0.0054    |
| -0.140              | 0.0932     |
| -0.333              | 0.0000     |
| -0.041              | -0.0410    |
| -0.003              | 0.0000     |
| -0.021              | -0.0112    |
| -0.024              | 0.0000     |
| -0.140              | -0.1402    |
| -0.099              | -0.0514    |
| -0.168              | 0.0000     |
| -0.055              | -0.0086    |
| -0.036              | -0.0363    |

**Hextuple**

| Arg-Ile-Leu-Lys-Met-Phe | Difference |
|-------------------------|------------|
| 6.44E-05                | 4.26E-05   |
| -0.137                  | -0.0909    |
| -0.047                  | -0.0313    |
| -0.383                  | -0.3211    |
| -0.252                  | -0.1287    |
| -0.266                  | -0.0872    |
| -0.074                  | -0.0489    |
| -0.088                  | -0.0407    |
| -0.140                  | -0.0927    |
| -0.015                  | -0.0097    |
| -0.233                  | 0.0000     |
| -0.333                  | 0.0000     |
| -0.041                  | -0.0410    |
| -0.003                  | 0.0000     |
| -0.030                  | -0.0201    |
| -0.024                  | 0.0000     |
| -0.215                  | -0.2154    |
| -0.139                  | -0.0923    |
| -0.168                  | 0.0000     |
| -0.095                  | -0.0486    |
| -0.051                  | -0.0514    |

**Heptuple**

| Arg-Ile-Leu |
|-------------|
| 0.000106    |
| -0.2266     |
| -0.07808    |
| -1.07772    |
| -0.41527    |
| -0.43897    |
| -0.12196    |
| -0.22958    |
| -0.23096    |
| -0.02412    |
| -0.233      |
| -0.333      |
| -0.041      |
| -0.003      |
| -0.05014    |
| -0.024      |
| -0.38203    |
| -0.23       |
| -0.168      |
| -0.114      |
| 0           |

avg from Cynober

**Difference**

8.45E-05  
-0.1801  
-0.0621  
-1.0157  
-0.2923  
-0.2601  
-0.0970  
-0.1825  
-0.1837  
-0.0192  
0.0000  
0.0000  
-0.0410  
0.0000  
-0.0398  
0.0000  
-0.3820  
-0.1829  
0.0000  
-0.0679  
0.0000

| Flux     | Control  | Met      | 1 | 2        | 3           |
|----------|----------|----------|---|----------|-------------|
|          |          |          |   | ile-met  | Ile-Leu-Met |
| Obj_atp  | 0        |          | 0 | 0        | 0           |
| Ex_ins   | 0        |          | 0 | -0.02019 | -0.03017    |
| Ex_gluc  | 0        |          | 0 | -0.02019 | -0.03017    |
| Ex_lac   | 0        |          | 0 | 0        | 0.00001     |
| Ex_pyr   | 0        |          | 0 | 0        | 0           |
| Ex_pal   | 0        |          | 0 | -0.125   | -0.125      |
| Ex_prop  | 0        |          | 0 | 0        | 0           |
| Ex_but   | 0        |          | 0 | 0        | 0           |
| Ex_5c    | 0        |          | 0 | 0        | 0           |
| Ex_6c    | 0        |          | 0 | 0        | 0           |
| Ex_8c    | 0        |          | 0 | 0        | 0           |
| Ex_9c    | 0        |          | 0 | 0        | 0           |
| Ex_10c   | 0        |          | 0 | 0        | 0           |
| Ex_12c   | 0        |          | 0 | 0        | 0           |
| Ex_14c   | 0        |          | 0 | 0        | -0.23       |
| Ex_18c   | 0        |          | 0 | 0        | 0           |
| Ex_glyc  | 0        |          | 0 | 0        | 0           |
| Ex_tag   | 0        |          | 0 | 0        | 0           |
| Ex_dag   | 0        |          | 0 | 0        | 0           |
| Ex_mag   | 0        |          | 0 | 0        | 0           |
| Ex_akg   | 0        |          | 0 | 0        | 0           |
| Ex_oaa   | 0        |          | 0 | 0        | 0           |
| Ex_rib   | 0        |          | 0 | 0        | 0           |
| Nut_o2   | -0.3368  | -0.44567 |   | -0.50314 | -8.64264    |
| Nut_co2  | 0.130971 | 0.15363  |   | 0.278516 | 6.075709    |
| Nut_h2o  | 2.114062 | 2.77549  |   | 3.327205 | -999940     |
| Nut_p    | 0        | 0        |   | 0.020193 | 0.090499    |
| Nut_hco3 | 0        | 0        |   | -0.07139 | -0.12421    |
| Nut_coa  | 0        | 0        |   | 0        | -0.23       |
| Nut_carn | 0        | 0        |   | 0        | 0           |
| Nut_dhf  | 0        | 0        |   | 0        | 0           |
| LPL      | 0        | 0        |   | 0        | 0           |
| DAGL     | 0        | 0        |   | 0        | 0           |
| 12DAG    | 0        | 0        |   | 0        | 0           |
| MAGL     | 0        | 0        |   | 0        | 0           |
| GLUT4    | 0        | 0        |   | 0.020193 | 0.030166    |
| MCT4     | 0        | 0        |   | 0        | -0.00001    |
| MCT_pyr  | 0        | 0        |   | 0        | 0           |
| FAT/CD36 | 0        | 0        |   | 0.125    | 0.125       |
| FATprop  | 0        | 0        |   | 0        | 0           |
| FATbut   | 0        | 0        |   | 0        | 0           |
| FAT5c    | 0        | 0        |   | 0        | 0           |
| FAT6c    | 0        | 0        |   | 0        | 0           |
| FAT8c    | 0        | 0        |   | 0        | 0           |
| FAT9c    | 0        | 0        |   | 0        | 0           |



|            |          |          |          |          |
|------------|----------|----------|----------|----------|
| FAT10c     | 0        | 0        | 0        | 0        |
| FAT12c     | 0        | 0        | 0        | 0        |
| FAT14c     | 0        | 0        | 0        | 0.23     |
| FAT18c     | 0        | 0        | 0        | 0        |
| Alc_glyc   | 0        | 0        | 0        | 0        |
| COA        | 0        | 0        | 0        | 0.23     |
| SLC22A5/O  | 0        | 0        | 0        | 0        |
| Xport_rib  | 0        | 0        | 0        | 0        |
| Dr_akg     | 0        | 0        | 0        | 0        |
| Dr_oaa     | 0        | 0        | 0        | 0        |
| Hex        | 0        | 0        | 0.020193 | 0.030166 |
| PGI        | 0        | 0        | 0.020183 | 0.030166 |
| PFK        | 0        | 0        | 0.02019  | 0.030166 |
| FBP        | 0        | 0        | 0        | 0        |
| Ald        | 0        | 0        | 0.02019  | 0.030166 |
| TPI        | 0        | 0        | 0.020193 | -0.03017 |
| D3PDeh     | 0        | 0        | 0        | 0.060333 |
| PGK        | 0        | 0        | 0        | 0.060333 |
| PGM        | -0.04194 | -0.0442  | -0.04038 | 0.060333 |
| Eno        | -0.04194 | -0.0442  | -0.04038 | 0.060333 |
| PyrK       | 0        | 0        | -0.04038 | 999997.3 |
| PEPSynth   | 0        | 0        | 0        | 999997.3 |
| PEPCarbK   | 0        | 0        | 0        | 0        |
| PEPCarbl   | 0.041944 | 0.0442   | 0        | 0        |
| LacDeh     | 0        | 0        | 0        | -0.00001 |
| MalDehC(n  | 0.024566 | 0.02577  | 0.00001  | 0.00001  |
| ASTC       | 0.066511 | 0.06997  | 0.00001  | 0.00001  |
| G3PDehC    | 0        | 0        | 0.040383 | 0        |
| Mal-AKGEX  | 0.024566 | 0.02577  | 0.00001  | 0.00001  |
| Glu-AspEx  | 0.113593 | 0.1352   | 0.074133 | 0.137807 |
| MCT        | 0        | 0        | 0        | 0.101062 |
| ASTM       | 0.113593 | 0.1352   | 0.074133 | 0.137807 |
| G3PDehM    | 0        | 0        | 0        | 0        |
| PyrSynth/P | 0        | 0        | 0        | 0.101062 |
| CitSynth   | 0        | 0        | 0.102191 | 2.901717 |
| Acon       | 0        | 0        | 0.102191 | 2.901717 |
| IsoDeh     | 0        | 0        | 0.102191 | 0        |
| IsoDehnadj | 0        | 0        | 0        | 2.901717 |
| AKGDeh     | 0.054718 | 0.017662 | 0.104924 | 2.755376 |
| SunCoaSyn  | 0.089026 | 0.10943  | 0.176314 | 3.039125 |
| SucDeh(I)  | 0.089026 | 0.10943  | 0.176314 | 3.039514 |
| Fum        | 0.089026 | 0.10943  | 0.176314 | 3.039514 |
| MalDehM    | 0.113593 | 0.1352   | 0.176324 | 3.039524 |
| NADHDeh(   | 0.410752 | 0.559151 | 0.676163 | 8.709936 |
| ETFUO      | 0.262851 | 0.332184 | 0.330108 | 8.575344 |
| UCytC(III) | 0.673602 | 0.891335 | 1.006272 | 17.28528 |
| CytCO(IV)  | 0.336801 | 0.445668 | 0.503136 | 8.64264  |

|             |          |          |          |          |
|-------------|----------|----------|----------|----------|
| ATPSynth(\  | 1.757956 | 2.341822 | 2.688707 | 43.2805  |
| AMP_ADPs    | 0.906337 | 1.181767 | 1.443671 | 999999   |
| PalTK       | 0        | 0        | 0.125    | 0.125    |
| CPT1B/CHK   | 0        | 0        | 0.00385  | 0.125    |
| SLC25A20/   | 0        | 0        | 0.00385  | 0.125    |
| CPT2        | 0        | 0        | 0.00385  | 0.125    |
| CRAT(mit)   | 0        | 0        | 0        | 0        |
| CRAT Trans  | 0        | 0        | 0        | 0        |
| CRAT(cyt)   | 0        | 0        | 0        | 0        |
| Acetyl-coal | 0        | 0        | 0        | 0        |
| AcylCoAde   | 0        | 0        | 0.00385  | 0.125    |
| EnoCoAdeI   | 0        | 0        | 0.00385  | 0.125    |
| 3HA-CoADe   | 0        | 0        | 0.00385  | 0.125    |
| AcylCoAAT   | 0        | 0        | 0.00385  | 0.125    |
| AcylCoAde   | 0        | 0        | 0        | 0        |
| EnoCoAdeI   | 0        | 0        | 0        | 0        |
| 3HA-CoADe   | 0        | 0        | 0        | 0        |
| AcylCoAAT   | 0        | 0        | 0        | 0        |
| AcylCoAde   | 0        | 0        | 0.00385  | 0.355    |
| EnoCoAdeI   | 0        | 0        | 0.00385  | 0.355    |
| 3HA-CoADe   | 0        | 0        | 0.00385  | 0.355    |
| AcylCoAAT   | 0        | 0        | 0.00385  | 0.355    |
| AcylCoAde   | 0        | 0        | 0.00385  | 0.355    |
| EnoCoAdeI   | 0        | 0        | 0.00385  | 0.355    |
| 3HA-CoADe   | 0        | 0        | 0.00385  | 0.355    |
| AcylCoAAT   | 0        | 0        | 0.00385  | 0.355    |
| AcylCoAde   | 0        | 0        | 0.00385  | 0.355    |
| EnoCoAdeI   | 0        | 0        | 0.00385  | 0.355    |
| 3HA-CoADe   | 0        | 0        | 0.00385  | 0.355    |
| AcylCoAAT   | 0        | 0        | 0.00385  | 0.355    |
| AcylCoAde   | 0        | 0        | 0.00385  | 0.355    |
| EnoCoAdeI   | 0        | 0        | 0.00385  | 0.355    |
| 3HA-CoADe   | 0        | 0        | 0.00385  | 0.355    |
| AcylCoAAT   | 0        | 0        | 0.00385  | 0.355    |
| AcylCoAde   | 0        | 0        | 0.00385  | 0.355    |
| EnoCoAdeI   | 0        | 0        | 0.00385  | 0.355    |
| 3HA-CoADe   | 0        | 0        | 0.00385  | 0.355    |
| AcylCoAAT   | 0        | 0        | 0.00385  | 0.355    |
| AcylCoAde   | 0        | 0        | 0.00385  | 0.355    |
| EnoCoAdeI   | 0        | 0        | 0.00385  | 0.388026 |
| 3HA-CoADe   | 0        | 0        | 0.00385  | 0.388026 |
| AcylCoAAT   | 0        | 0        | 0.00385  | 0.388415 |
| GK          | 0        | 0        | 0        | 0        |
| GPAT4       | 0        | 0        | 0.040383 | 0        |
| ABHD5       | 0        | 0        | 0.040383 | 0        |
| DAGZ/DAG    | 0        | 0        | 0.040383 | 0        |
| DGAT1       | 0        | 0        | 0.040383 | 0        |

|           |   |   |          |      |
|-----------|---|---|----------|------|
| St_TAG    | 0 | 0 | 0.040383 | 0    |
| ACAS2     | 0 | 0 | 0        | 0    |
| ACSM-But  | 0 | 0 | 0        | 0    |
| ACSM-5c   | 0 | 0 | 0        | 0    |
| ACSM-6c   | 0 | 0 | 0        | 0    |
| ACSM-8c   | 0 | 0 | 0        | 0    |
| ACSM-9c   | 0 | 0 | 0        | 0    |
| ACSM-10c  | 0 | 0 | 0        | 0    |
| ACSM-12c  | 0 | 0 | 0        | 0    |
| ACSM-14c  | 0 | 0 | 0        | 0.23 |
| ACSM-18c  | 0 | 0 | 0        | 0    |
| CPT1B/CHK | 0 | 0 | 0        | 0    |
| CPT1B/CHK | 0 | 0 | 0        | 0    |
| CPT1B/CHK | 0 | 0 | 0        | 0    |
| CPT1B/CHK | 0 | 0 | 0        | 0    |
| CPT1B/CHK | 0 | 0 | 0        | 0    |
| CPT1B/CHK | 0 | 0 | 0        | 0    |
| CPT1B/CHK | 0 | 0 | 0        | 0    |
| CPT1B/CHK | 0 | 0 | 0        | 0    |
| CPT1B/CHK | 0 | 0 | 0        | 0.23 |
| CPT1B/CHK | 0 | 0 | 0        | 0    |
| SLC25A20/ | 0 | 0 | 0        | 0    |
| SLC25A20/ | 0 | 0 | 0        | 0    |
| SLC25A20/ | 0 | 0 | 0        | 0    |
| SLC25A20/ | 0 | 0 | 0        | 0    |
| SLC25A20/ | 0 | 0 | 0        | 0    |
| SLC25A20/ | 0 | 0 | 0        | 0    |
| SLC25A20/ | 0 | 0 | 0        | 0    |
| SLC25A20/ | 0 | 0 | 0        | 0    |
| SLC25A20/ | 0 | 0 | 0        | 0.23 |
| SLC25A20/ | 0 | 0 | 0        | 0    |
| CPT2      | 0 | 0 | 0        | 0    |
| CPT2      | 0 | 0 | 0        | 0    |
| CPT2      | 0 | 0 | 0        | 0    |
| CPT2      | 0 | 0 | 0        | 0    |
| CPT2      | 0 | 0 | 0        | 0    |
| CPT2      | 0 | 0 | 0        | 0    |
| CPT2      | 0 | 0 | 0        | 0    |
| CPT2      | 0 | 0 | 0        | 0    |
| CPT2      | 0 | 0 | 0        | 0.23 |
| CPT2      | 0 | 0 | 0        | 0    |
| AcylCoADe | 0 | 0 | 0        | 0    |
| EnoCoADel | 0 | 0 | 0        | 0    |
| 3HA-CoADe | 0 | 0 | 0        | 0    |
| AcylCoAAT | 0 | 0 | 0        | 0    |
| AcylCoADe | 0 | 0 | 0        | 0    |
| EnoCoADel | 0 | 0 | 0        | 0    |

|             |          |          |          |          |
|-------------|----------|----------|----------|----------|
| 3HA-CoADe   | 0        | 0        | 0        | 0        |
| AcylCoAAT   | 0        | 0        | 0        | 0        |
| AcylCoADe   | 0        | 0        | 0        | 0        |
| EnoCoADel   | 0        | 0        | 0        | 0        |
| 3HA-CoADe   | 0        | 0        | 0        | 0        |
| AcylCoAAT   | 0        | 0        | 0        | 0        |
| AKR1A1      | 0        | 0        | 0        | 0        |
| ALDH3A2     | 0        | 0        | 0        | 0        |
| GLYCTK      | 0        | 0        | 0        | 0        |
| EAA_arg     | -0.04645 | -0.06036 | -0.06712 | -0.08    |
| EAA_his     | -0.01601 | -0.0208  | -0.02313 | -0.082   |
| EAA_ile     | -0.04771 | -0.062   | -0.14033 | -0.206   |
| EAA_leu     | -0.08513 | -0.11062 | -0.123   | -0.147   |
| EAA_lys     | -0.08998 | -0.11693 | -0.13002 | -0.188   |
| EAA_met     | -0.025   | -0.03249 | -0.03612 | -0.04306 |
| EAA_phe     | -0.04706 | -0.057   | -0.04289 | -0.057   |
| EAA_thr     | -0.04734 | -0.06152 | -0.06841 | -0.08154 |
| EAA_trp     | -0.00494 | -0.00642 | -0.00714 | -0.00851 |
| EAA_val     | -0.07651 | -0.14661 | -0.06098 | -0.233   |
| NEAA_ala    | -0.333   | -0.333   | -0.333   | -0.333   |
| NEAA_asn    | -0.03467 | -0.041   | -0.041   | 0        |
| NEAA_asp    | 0        | 0        | -0.003   | -0.003   |
| NEAA_cys    | -0.01028 | -0.01336 | -0.01485 | -0.0177  |
| NEAA_glu    | -0.024   | -0.024   | -0.024   | -0.024   |
| NEAA_gln    | -0.05205 | -0.07168 | -0.0843  | 0        |
| NEAA_gly    | -0.04715 | -0.06126 | -0.06812 | -0.13563 |
| NEAA_pro    | -0.168   | -0.168   | -0.168   | -0.168   |
| NEAA_ser    | -0.00418 | -0.01573 | -0.02626 | -0.06574 |
| NEAA_tyr    | 0        | -0.00415 | -0.02511 | -0.02405 |
| DLDH        | 0.034309 | 0.091768 | 0.07139  | 0.284528 |
| MT_val      | 0.034309 | 0.091768 | 0        | 0.160314 |
| BCAT2-val   | 0.034309 | 0.091768 | 0        | 0.160314 |
| BCKDHB-val  | 0.034309 | 0.091768 | 0        | 0.160314 |
| BCKADE2-val | 0.034309 | 0.091768 | 0        | 0.160314 |
| ACADSB      | 0.034309 | 0.091768 | 0        | 0.160314 |
| ECHS1       | 0.034309 | 0.091768 | 0        | 0.160314 |
| HIBCH       | 0.034309 | 0.091768 | 0        | 0.160314 |
| HIBADH      | 0.034309 | 0.091768 | 0        | 0.160314 |
| ALDH6A1     | 0.034309 | 0.091768 | 0        | 0.160314 |
| PCCB        | 0.034309 | 0.091768 | 0.07139  | 0.284138 |
| MCEE        | 0.034309 | 0.091768 | 0.07139  | 0.284138 |
| MUT         | 0.034309 | 0.091768 | 0.07139  | 0.284138 |
| MT_ile      | 0        | 0        | 0.07139  | 0.123825 |
| BCAT-ile    | 0        | 0        | 0.07139  | 0.123825 |
| BCKDHB-ile  | 0        | 0        | 0.07139  | 0.123825 |
| BCKADE2-il  | 0        | 0        | 0.07139  | 0.123825 |
| ECHS1       | 0        | 0        | 0.07139  | 0.123825 |

|            |          |          |          |          |
|------------|----------|----------|----------|----------|
| HSD17B10   | 0        | 0        | 0.07139  | 0.123825 |
| ACAT1      | 0        | 0        | 0.07139  | 0.123825 |
| MT_leu     | 0        | 0        | 0        | 0.00039  |
| BCAT2-leu  | 0        | 0        | 0        | 0.00039  |
| BCKDHB-le  | 0        | 0        | 0        | 0.00039  |
| BCKADE2-li | 0        | 0        | 0        | 0.00039  |
| IVD        | 0        | 0        | 0        | 0.00039  |
| MCC1,MCC   | 0        | 0        | 0        | 0.00039  |
| MGCA       | 0        | 0        | 0        | 0.00039  |
| HMGCL      | 0        | 0        | 0        | 0.00039  |
| OXCT       | 0        | 0        | 0        | 0.00039  |
| HMGCS2     | 0        | 0        | 0        | 0        |
| GluDeh     | 0        | 0        | 0        | 0.066441 |
| GlnSynth   | 0        | 0        | 0        | 0.216047 |
| GLN_Elim   | 0        | 0        | 0        | 0.066699 |
| ALT        | 0        | 0        | -0.04038 | 0        |
| ALA_Elim   | 0.253122 | 0.229204 | 0.1772   | 0.195429 |
| SDS        | 0        | 0        | 0        | 0.040739 |
| CBS        | 0        | 0        | 0        | 0        |
| CTH        | 0        | 0        | 0        | 0        |
| ILVBL      | 0        | 0        | 0        | 0        |
| 2a2hButLe: | 0        | 0        | 0        | 0        |
| MT_lys     | 0        | 0        | 0        | 0.033026 |
| AASS       | 0        | 0        | 0        | 0.033026 |
| AASS       | 0        | 0        | 0        | 0.033026 |
| aAASADeh   | 0        | 0        | 0        | 0.033026 |
| KATII      | 0        | 0        | 0        | 0.033026 |
| lysdeg     | 0        | 0        | 0        | 0.033026 |
| GCDH       | 0        | 0        | 0        | 0.033026 |
| MT_pro     | 0.139516 | 0.130987 | 0.126843 | 0.118942 |
| PRODH      | 0.139516 | 0.130987 | 0.126843 | 3.087101 |
| ALDH4a1    | 0.139516 | 0.130987 | 0.126843 | 0.118942 |
| GATM       | 0        | 0        | 0        | 0        |
| Dr_orn     | 0        | 0        | 0        | 0        |
| GAMT       | 0        | 0        | 0        | 0        |
| Dr_cr      | 0        | 0        | 0        | 0        |
| AdoHcyase  | 0        | 0        | 0        | 0        |
| MTR        | 0        | 0        | 0        | 0        |
| AdoMet     | 0        | 0        | 0        | 0        |
| SHMT       | 0        | 0        | 0        | -0.05443 |
| MTHFR      | 0        | 0        | 0        | 0        |
| DHFR       | 0        | 0        | 0        | 0        |
| HAL        | 0        | 0        | 0        | 0.054433 |
| FLJ31300   | 0        | 0        | 0        | 0.054433 |
| MGC35366   | 0        | 0        | 0        | 0.054433 |
| FTCD1      | 0        | 0        | 0        | 0.054433 |
| FTCD2      | 0        | 0        | 0        | 0.054433 |

|          |          |          |          |          |
|----------|----------|----------|----------|----------|
| FT       | 0        | 0        | 0        | 0.054433 |
| ASNase   | 0        | 0        | 0        | 0        |
| ASNSynth | 0        | 0.00405  | 0.009094 | 0.059709 |
| PHGDH    | 0.041944 | 0.0442   | 0.040383 | 0        |
| PSA      | 0.041944 | 0.0442   | 0.040383 | 0        |
| PSPH     | 0.041944 | 0.0442   | 0.040383 | 0        |
| P5CS     | 0        | 0        | 0        | 0        |
| PYCS     | 0        | 0        | 0        | 0        |
| Spont    | 0        | 0        | 0        | 0        |
| PYRCR1   | 0        | 0        | 0        | 2.968159 |
| PAG      | 0.017378 | 0.01843  | 0        | 0.00588  |
| PCBD     | 0.017378 | 0.01843  | 0        | 0.00588  |
| QDPR     | 0.017378 | 0.01843  | 0        | 0.00588  |
| MT_glu   | 0.173824 | 0.222754 | 0.198233 | 0.403081 |
| tRNA     | 0        | 0        | 0        | 0        |
| YARS     | 0.017378 | 0.022581 | 0.02511  | 0.02993  |
| WARS     | 0.004943 | 0.006424 | 0.007143 | 0.008514 |
| TARS     | 0.047343 | 0.061519 | 0.068407 | 0.081538 |
| LARS     | 0.085126 | 0.110615 | 0.123    | 0.14661  |
| IARS     | 0.047713 | 0.062    | 0.068942 | 0.082175 |
| KARS     | 0.089983 | 0.116926 | 0.130017 | 0.154974 |
| AARS     | 0.079878 | 0.103796 | 0.115417 | 0.137571 |
| VARs     | 0.042204 | 0.054841 | 0.060981 | 0.072686 |
| MARS     | 0.025    | 0.032486 | 0.036123 | 0.043057 |
| SARS     | 0.046124 | 0.059934 | 0.066645 | 0.079437 |
| DARS     | 0.047082 | 0.061179 | 0.068029 | 0.081088 |
| GARS     | 0.047147 | 0.061264 | 0.068124 | 0.0812   |
| PARs     | 0.028484 | 0.037013 | 0.041157 | 0.049058 |
| CARS     | 0.010279 | 0.013356 | 0.014852 | 0.017703 |
| EPRS     | 0.108798 | 0.141375 | 0.157203 | 0.187379 |
| QARS     | 0.052047 | 0.067631 | 0.075203 | 0.089639 |
| RARS     | 0.04645  | 0.060359 | 0.067117 | 0.08     |
| FARS     | 0.029682 | 0.03857  | 0.042888 | 0.05112  |
| HARS     | 0.016006 | 0.020799 | 0.023127 | 0.027567 |
| NARS     | 0.034669 | 0.04505  | 0.050094 | 0.059709 |
| ACT      | 0.000152 | 0.000198 | 0.00022  | 0.000263 |
| MYOHC1-2 | 0        | 0        | 0        | 0        |
| MYOHC2a  | 0.000305 | 0.000396 | 0.000441 | 0.000525 |
| MYOHC2b  | 0        | 0        | 0        | 0        |
| MYOLCk   | 0.000305 | 0.000396 | 0.000441 | 0.000525 |
| MYOLCp   | 0.000305 | 0.000396 | 0.000441 | 0.000525 |
| MYO1-2x  | 0        | 0        | 0        | 0        |
| MYO2a    | 0.000152 | 0.000198 | 0.00022  | 0.000263 |
| MYO2x    | 0        | 0        | 0        | 0        |
| MYO2b    | 0        | 0        | 0        | 0        |
| TMN1     | 0        | 0        | 0        | 0        |
| TMN2     | 4.36E-05 | 5.66E-05 | 6.29E-05 | 7.5E-05  |

|             |          |          |           |          |
|-------------|----------|----------|-----------|----------|
| DIM-TMN1    | 0        | 0        | 0         | 0        |
| DIM-TMN2    | 2.18E-05 | 2.83E-05 | 3.15E-05  | 3.75E-05 |
| TPNC1       | 0        | 0        | 0         | 0        |
| TPNC2       | 2.18E-05 | 2.83E-05 | 3.15E-05  | 3.75E-05 |
| TPNI1       | 0        | 0        | 0         | 0        |
| TPNI2       | 2.18E-05 | 2.83E-05 | 3.15E-05  | 3.75E-05 |
| TPNT1       | 0        | 0        | 0         | 0        |
| TPNT2       | 2.18E-05 | 2.83E-05 | 3.15E-05  | 3.75E-05 |
| TPN1        | 0        | 0        | 0         | 0        |
| TPN2        | 2.18E-05 | 2.83E-05 | 3.15E-05  | 3.75E-05 |
| CONTR-CO    | 0        | 0        | 0         | 0        |
| CONTR-CO    | 2.18E-05 | 2.83E-05 | 3.15E-05  | 3.75E-05 |
| CONTR-CO    | 0        | 0        | 0         | 0        |
| CONTR-CO    | 0        | 0        | 0         | 0        |
| Str_CONTR   | 0        | 0        | 0         | 0        |
| Str_CONTR   | 2.18E-05 | 2.83E-05 | 3.15E-05  | 3.75E-05 |
| Str_CONTR   | 0        | 0        | 0         | 0        |
| Str_CONTR   | 0        | 0        | 0         | 0        |
| CKM         | 0        | 0        | 0         | -42.3428 |
| Spont       | 0        | 0        | 0         | 42.34276 |
| Nut_cr      | 0        | 0        | 0         | 0        |
| ATP2UTP     | 0        | 0        | 0         | 0        |
| UDP2ADP     | 0        | 0        | 0         | 0        |
| PGM1        | 0        | 0        | 0         | 0        |
| UGP2        | 0        | 0        | 0         | 0        |
| mGYG        | 0        | 0        | 0         | 0        |
| mGYS1       | 0        | 0        | 0         | 0        |
| G6PD        | 0        | 0        | 0.00001   | 0        |
| PGLS        | 0        | 0        | 0.00001   | 0        |
| PGD         | 0        | 0        | 0         | 0        |
| PGD         | 0        | 0        | 0.00001   | 0        |
| RPE         | 0        | 0        | 6.67E-06  | 0        |
| RPIA        | 0        | 0        | 3.33E-06  | 0        |
| TKT1        | 0        | 0        | 3.33E-06  | 0        |
| TKT2        | 0        | 0        | -3.33E-06 | 0        |
| TALDO       | 0        | 0        | 3.33E-06  | 0        |
| RBSK        | 0        | 0        | 0         | 0        |
| GCL         | 0        | 0        | 0         | 0        |
| GSS         | 0        | 0        | 0         | 0        |
| glutathxpo  | 0        | 0        | 0         | 0        |
| GSR         | 0        | 0        | 0         | 0        |
| GSR         | 0        | 0        | 0         | 0        |
| GlutathLea  | 0        | 0        | 0         | 0        |
| GlutathLea  | 0        | 0        | 0         | 0        |
| Recycle_na  | 0        | 0        | 0.00001   | 0        |
| fa-c6 leak  | 0        | 0        | 0         | 0        |
| acetyLeak(i | 0        | 0        | 0         | 0.00039  |





|          |          |          |          |          |
|----------|----------|----------|----------|----------|
| 0        | 0        | 0        | 0        | 0        |
| 0        | 0        | 0        | 0        | 0        |
| 0.23     | 0.23     | 0.23     | 0.23     | 0.23     |
| 0        | 0        | 0        | 0        | 0        |
| 0        | 0        | 0        | 0        | 0        |
| 0.23     | 0.23     | 0.23     | 0.23     | 0.23     |
| 0        | 0        | 0        | 0        | 0        |
| 0        | 0        | 0        | 0        | 0        |
| 0        | 0        | 0        | 0        | 0        |
| 0        | 0        | 0        | 0        | 0        |
| 0.000005 | 0.018159 | 0.014503 | 0.01311  | 0.01311  |
| 0.000005 | 0.018159 | 0.014503 | 0.01311  | 0.01311  |
| 0.000005 | 0.018159 | 0.014503 | 0.01311  | 0.01311  |
| 0        | 0        | 0        | 0        | 0        |
| 0.000005 | 0.018159 | 0.014503 | 0.01311  | 0.01311  |
| -5E-06   | -0.01816 | -0.0145  | 0.01311  | 0.01311  |
| 0.00001  | 0.036318 | 0.029005 | 2E-10    | 2E-10    |
| 0.00001  | 0.036318 | 0.029005 | 2E-10    | 2E-10    |
| 0.00001  | 0.036318 | 0.006612 | -0.11101 | -0.06906 |
| 0.00001  | 0.036318 | 0.006612 | -0.11101 | -0.06906 |
| 999997.1 | 999996.9 | 999996.1 | 999994.3 | 999994.3 |
| 999997.1 | 999996.9 | 999996.1 | 999994.3 | 999994.3 |
| 0        | 0        | 0        | 0        | 0        |
| 0        | 0        | 0        | 0.167679 | 0.125735 |
| 0        | 0        | 0        | 0        | 0        |
| 0.00001  | 0.00001  | 0.00001  | 0.00001  | -0.02456 |
| 0.00001  | 0.00001  | 0.00001  | 0.167689 | 0.101178 |
| 0        | 0        | 0        | 0.026221 | 0.026221 |
| 0.00001  | 0.00001  | 0.00001  | 0.00001  | -0.02456 |
| 0.154    | 0.167812 | 0.238758 | 0.563497 | 0.449905 |
| 1E-05    | 0.036318 | 0.029005 | 0        | 0        |
| 0.154    | 0.167812 | 0.238758 | 0.563497 | 0.449905 |
| 0        | 0        | 0        | 0        | 0        |
| 1E-05    | 0.036318 | 0.029005 | 0        | 0        |
| 3.00075  | 2.971422 | 2.88374  | 2.826503 | 2.826503 |
| 3.00075  | 2.971422 | 2.88374  | 2.826503 | 2.826503 |
| 0        | 0        | 0        | 0        | 0        |
| 3.00075  | 2.971422 | 2.88374  | 2.826503 | 2.826503 |
| 2.867813 | 2.855787 | 2.771384 | 2.517637 | 2.462919 |
| 3.026857 | 3.045978 | 3.121573 | 3.389707 | 3.30068  |
| 3.15474  | 3.139224 | 3.122487 | 3.389991 | 3.300964 |
| 3.15474  | 3.139224 | 3.122487 | 3.389991 | 3.300964 |
| 3.15475  | 3.139234 | 3.122497 | 3.390001 | 3.276408 |
| 8.889565 | 8.844769 | 8.717974 | 9.136811 | 8.726059 |
| 8.93151  | 8.805449 | 8.455022 | 7.977581 | 7.714731 |
| 17.82108 | 17.65022 | 17.173   | 17.11439 | 16.44079 |
| 8.910538 | 8.825109 | 8.586498 | 8.557196 | 8.220395 |

|          |          |          |          |          |
|----------|----------|----------|----------|----------|
| 44.53172 | 44.14521 | 43.06396 | 43.3656  | 41.60764 |
| 999999   | 999999   | 999999   | 999999   | 999998.1 |
| 0.125    | 0.125    | 0.125    | 0.125    | 0.125    |
| 0.125    | 0.125    | 0.125    | 0.046337 | 0.046337 |
| 0.125    | 0.125    | 0.125    | 0.046337 | 0.046337 |
| 0.125    | 0.125    | 0.125    | 0.046337 | 0.046337 |
| 0        | 0        | 0        | 0        | 0        |
| 0        | 0        | 0        | 0        | 0        |
| 0        | 0        | 0        | 0        | 0        |
| 0        | 0        | 0        | 0        | 0        |
| 0.125    | 0.125    | 0.125    | 0.046337 | 0.046337 |
| 0.125    | 0.125    | 0.125    | 0.046337 | 0.046337 |
| 0.125    | 0.125    | 0.125    | 0.046337 | 0.046337 |
| 0.125    | 0.125    | 0.125    | 0.046337 | 0.046337 |
| 0        | 0        | 0        | 0        | 0        |
| 0        | 0        | 0        | 0        | 0        |
| 0        | 0        | 0        | 0        | 0        |
| 0        | 0        | 0        | 0        | 0        |
| 0.355    | 0.355    | 0.355    | 0.276337 | 0.276337 |
| 0.355    | 0.355    | 0.355    | 0.276337 | 0.276337 |
| 0.355    | 0.355    | 0.355    | 0.276337 | 0.276337 |
| 0.355    | 0.355    | 0.355    | 0.276337 | 0.276337 |
| 0.355    | 0.355    | 0.355    | 0.276337 | 0.276337 |
| 0.355    | 0.355    | 0.355    | 0.276337 | 0.276337 |
| 0.355    | 0.355    | 0.355    | 0.276337 | 0.276337 |
| 0.355    | 0.355    | 0.355    | 0.276337 | 0.276337 |
| 0.355    | 0.355    | 0.355    | 0.276337 | 0.276337 |
| 0.355    | 0.355    | 0.355    | 0.276337 | 0.276337 |
| 0.355    | 0.355    | 0.355    | 0.276337 | 0.276337 |
| 0.355    | 0.355    | 0.355    | 0.276337 | 0.276337 |
| 0.355    | 0.355    | 0.355    | 0.276337 | 0.276337 |
| 0.355    | 0.355    | 0.355    | 0.276337 | 0.276337 |
| 0.355    | 0.355    | 0.355    | 0.276337 | 0.276337 |
| 0.355    | 0.355    | 0.355    | 0.276337 | 0.276337 |
| 0.355    | 0.355    | 0.355    | 0.276337 | 0.276337 |
| 0.355    | 0.355    | 0.355    | 0.276337 | 0.276337 |
| 0.355    | 0.355    | 0.355    | 0.276337 | 0.276337 |
| 0.355    | 0.355    | 0.355    | 0.276337 | 0.276337 |
| 0.355    | 0.355    | 0.355    | 0.276337 | 0.276337 |
| 0.355    | 0.355    | 0.355    | 0.276337 | 0.276337 |
| 0.482883 | 0.448246 | 0.355914 | 0.276621 | 0.276621 |
| 0        | 0        | 0        | 0        | 0        |
| 0        | 0        | 0        | 0.026221 | 0.026221 |
| 0        | 0        | 0        | 0.026221 | 0.026221 |
| 0        | 0        | 0        | 0.026221 | 0.026221 |
| 0        | 0        | 0        | 0.026221 | 0.026221 |



|          |          |          |          |          |
|----------|----------|----------|----------|----------|
| 0        | 0        | 0        | 0        | 0        |
| 0        | 0        | 0        | 0        | 0        |
| 0        | 0        | 0        | 0        | 0        |
| 0        | 0        | 0        | 0        | 0        |
| 0        | 0        | 0        | 0        | 0        |
| 0        | 0        | 0        | 0        | 0        |
| 0        | 0        | 0        | 0        | 0        |
| 0        | 0        | 0        | 0        | 0        |
| 0        | 0        | 0        | 0        | 0        |
| -0.0892  | -0.09705 | -0.13736 | -0.2266  | -0.18015 |
| -0.03074 | -0.03344 | -0.04733 | -0.07808 | -0.06208 |
| -0.2266  | -0.2383  | -0.384   | -1.078   | -1.03029 |
| -0.29136 | -0.2711  | -0.25264 | -0.41556 | -0.33043 |
| -0.1728  | -0.188   | -0.26609 | -0.43897 | -0.34898 |
| -0.04801 | -0.05223 | -0.07393 | -0.12196 | -0.09696 |
| -0.057   | -0.09832 | -0.13916 | -0.22958 | -0.18251 |
| -0.09092 | -0.09891 | -0.14    | -0.23096 | -0.18361 |
| -0.00949 | -0.01033 | -0.01462 | -0.02412 | -0.01917 |
| -0.233   | -0.233   | -0.233   | -0.233   | -0.15649 |
| -0.333   | -0.333   | -0.333   | -0.333   | 0        |
| 0        | 0        | 0        | 0        | 0.034669 |
| -0.003   | -0.003   | -0.003   | -0.003   | -0.003   |
| -0.01974 | -0.02148 | -0.0304  | -0.05014 | -0.03986 |
| -0.024   | -0.024   | -0.024   | -0.024   | 0        |
| -0.03864 | -0.08793 | -0.25552 | -0.42275 | -0.3707  |
| -0.09054 | -0.0985  | -0.13942 | -0.23    | -0.18285 |
| -0.168   | -0.168   | -0.168   | -0.168   | 0        |
| -0.08857 | -0.09637 | -0.114   | -0.114   | -0.10982 |
| -0.03337 | 0        | 0        | 0        | 0        |
| 0.41481  | 0.376682 | 0.352017 | 0.872637 | 0.838329 |
| 0.151954 | 0.144824 | 0.108198 | 0.027115 | -0.00719 |
| 0.151954 | 0.144824 | 0.108198 | 0.027115 | -0.00719 |
| 0.151954 | 0.144824 | 0.108198 | 0.027115 | -0.00719 |
| 0.151954 | 0.144824 | 0.108198 | 0.027115 | -0.00719 |
| 0.151954 | 0.144824 | 0.108198 | 0.027115 | -0.00719 |
| 0.151954 | 0.144824 | 0.108198 | 0.027115 | -0.00719 |
| 0.151954 | 0.144824 | 0.108198 | 0.027115 | -0.00719 |
| 0.151954 | 0.144824 | 0.108198 | 0.027115 | -0.00719 |
| 0.151954 | 0.144824 | 0.108198 | 0.027115 | -0.00719 |
| 0.286927 | 0.283436 | 0.351103 | 0.872353 | 0.838045 |
| 0.286927 | 0.283436 | 0.351103 | 0.872353 | 0.838045 |
| 0.286927 | 0.283436 | 0.351103 | 0.872353 | 0.838045 |
| 0.134973 | 0.138613 | 0.242905 | 0.845238 | 0.845238 |
| 0.134973 | 0.138613 | 0.242905 | 0.845238 | 0.845238 |
| 0.134973 | 0.138613 | 0.242905 | 0.845238 | 0.845238 |
| 0.134973 | 0.138613 | 0.242905 | 0.845238 | 0.845238 |
| 0.134973 | 0.138613 | 0.242905 | 0.845238 | 0.845238 |



|          |          |          |          |          |
|----------|----------|----------|----------|----------|
| 0        | 0        | 0        | 0        | 0        |
| 0        | 0        | 0        | 0        | 0        |
| 0.066577 | 0.072434 | 0.102521 | 0.169127 | 0.169127 |
| 0        | 0        | 0.022394 | 0.111007 | 0.069062 |
| 0        | 0        | 0.022394 | 0.111007 | 0.069062 |
| 0        | 0        | 0.022394 | 0.111007 | 0.069062 |
| 0        | 0        | 0        | 0        | 0        |
| 0        | 0        | 0        | 0        | 0        |
| 0        | 0        | 0        | 0        | 0        |
| 3.128633 | 3.064668 | 2.884654 | 2.826787 | 2.826787 |
| 0        | 0.036308 | 0.051389 | 0.084776 | 0.067398 |
| 0        | 0.036308 | 0.051389 | 0.084776 | 0.067398 |
| 0        | 0.036308 | 0.051389 | 0.084776 | 0.067398 |
| 0.400227 | 0.391924 | 0.434871 | 0.901397 | 0.727573 |
| 0        | 0        | 0        | 0        | 0        |
| 0.033372 | 0.036308 | 0.051389 | 0.084776 | 0.067398 |
| 0.009493 | 0.010328 | 0.014618 | 0.024115 | 0.019172 |
| 0.090916 | 0.098914 | 0.14     | 0.230956 | 0.183613 |
| 0.163472 | 0.177854 | 0.25173  | 0.415275 | 0.330149 |
| 0.091627 | 0.099687 | 0.141095 | 0.232762 | 0.185049 |
| 0.172798 | 0.188    | 0.26609  | 0.438965 | 0.348983 |
| 0.153394 | 0.166889 | 0.23621  | 0.389672 | 0.309794 |
| 0.081046 | 0.088176 | 0.124802 | 0.205885 | 0.163681 |
| 0.048009 | 0.052232 | 0.073928 | 0.121958 | 0.096958 |
| 0.088574 | 0.096366 | 0.136394 | 0.225007 | 0.178883 |
| 0.090414 | 0.098368 | 0.139227 | 0.229681 | 0.182599 |
| 0.090539 | 0.098504 | 0.13942  | 0.23     | 0.182853 |
| 0.0547   | 0.059512 | 0.084232 | 0.138956 | 0.110472 |
| 0.019739 | 0.021475 | 0.030396 | 0.050143 | 0.039864 |
| 0.20893  | 0.227311 | 0.32173  | 0.530753 | 0.421955 |
| 0.099949 | 0.108742 | 0.15391  | 0.253903 | 0.201856 |
| 0.089201 | 0.097048 | 0.13736  | 0.2266   | 0.18015  |
| 0.057    | 0.062015 | 0.087774 | 0.144799 | 0.115117 |
| 0.030737 | 0.033441 | 0.047332 | 0.078083 | 0.062077 |
| 0.066577 | 0.072434 | 0.102521 | 0.169127 | 0.134458 |
| 0.000293 | 0.000318 | 0.000451 | 0.000744 | 0.000591 |
| 0        | 0        | 0        | 0        | 0        |
| 0.000585 | 0.000637 | 0.000902 | 0.001487 | 0.001182 |
| 0        | 0        | 0        | 0        | 0        |
| 0.000585 | 0.000637 | 0.000902 | 0.001487 | 0.001182 |
| 0.000585 | 0.000637 | 0.000902 | 0.001487 | 0.001182 |
| 0        | 0        | 0        | 0        | 0        |
| 0.000293 | 0.000318 | 0.000451 | 0.000744 | 0.000591 |
| 0        | 0        | 0        | 0        | 0        |
| 0        | 0        | 0        | 0        | 0        |
| 0        | 0        | 0        | 0        | 0        |
| 8.36E-05 | 9.1E-05  | 0.000129 | 0.000212 | 0.000169 |



|     | <b>actin</b> | <b>myoHC1-2</b> | <b>myoHC2a</b> | <b>myoHC2b</b> | <b>myoLCk</b> | <b>myoLCp</b> | <b>tmn1</b> | <b>tmn2</b> |
|-----|--------------|-----------------|----------------|----------------|---------------|---------------|-------------|-------------|
| arg | 18           | 104             | 106            | 100            | 24            | 7             | 14          | 20          |
| his | 9            | 37              | 36             | 40             | 10            | 1             | 2           | 2           |
| ile | 30           | 103             | 104            | 94             | 24            | 10            | 12          | 12          |
| leu | 26           | 191             | 200            | 194            | 50            | 9             | 34          | 28          |
| lys | 19           | 208             | 209            | 212            | 52            | 16            | 38          | 25          |
| met | 17           | 55              | 46             | 56             | 18            | 7             | 8           | 5           |
| phe | 12           | 56              | 58             | 61             | 20            | 12            | 1           | 1           |
| thr | 27           | 101             | 98             | 101            | 30            | 11            | 8           | 11          |
| trp | 4            | 9               | 9              | 9              | 4             | 1             | 0           | 0           |
| val | 21           | 84              | 84             | 86             | 31            | 10            | 7           | 10          |
| ala | 29           | 171             | 172            | 168            | 56            | 12            | 38          | 28          |
| asn | 12           | 76              | 75             | 77             | 24            | 7             | 7           | 6           |
| asp | 22           | 98              | 93             | 94             | 30            | 15            | 19          | 14          |
| cys | 6            | 17              | 18             | 17             | 10            | 2             | 1           | 3           |
| glu | 28           | 261             | 265            | 263            | 48            | 15            | 61          | 54          |
| gln | 11           | 130             | 131            | 127            | 23            | 7             | 15          | 15          |
| gly | 28           | 72              | 77             | 73             | 48            | 13            | 3           | 4           |
| pro | 19           | 31              | 30             | 32             | 47            | 6             | 0           | 0           |
| ser | 23           | 94              | 92             | 97             | 39            | 6             | 11          | 7           |
| tyr | 16           | 41              | 38             | 38             | 8             | 2             | 6           | 3           |



| tpnc1 | tpnc2 | tpni1 | tpni2 | tpnt1 | tpnt2 | Type 1 |
|-------|-------|-------|-------|-------|-------|--------|
| 4     | 7     | 19    | 17    | 29    | 25    | 2096   |
| 0     | 1     | 4     | 5     | 5     | 4     | 748    |
| 9     | 10    | 4     | 5     | 10    | 10    | 2175   |
| 13    | 9     | 22    | 17    | 19    | 19    | 3804   |
| 13    | 9     | 24    | 23    | 32    | 39    | 4142   |
| 11    | 11    | 8     | 10    | 7     | 4     | 1281   |
| 9     | 10    | 2     | 3     | 6     | 4     | 1335   |
| 7     | 6     | 6     | 4     | 4     | 7     | 2210   |
| 0     | 0     | 2     | 1     | 3     | 2     | 229    |
| 8     | 7     | 13    | 8     | 11    | 6     | 1943   |
| 7     | 12    | 15    | 13    | 20    | 24    | 3667   |
| 5     | 3     | 3     | 5     | 3     | 4     | 1607   |
| 23    | 19    | 10    | 11    | 12    | 18    | 2239   |
| 2     | 1     | 3     | 3     | 1     | 0     | 456    |
| 23    | 26    | 22    | 25    | 54    | 49    | 4953   |
| 5     | 5     | 4     | 8     | 16    | 16    | 2372   |
| 12    | 13    | 6     | 7     | 12    | 9     | 2094   |
| 2     | 2     | 7     | 5     | 18    | 6     | 1336   |
| 5     | 7     | 11    | 10    | 11    | 8     | 2156   |
| 3     | 2     | 2     | 2     | 5     | 4     | 848    |

| <b>Type 2a</b> | <b>Type 2x</b> | <b>Type 2b</b> |
|----------------|----------------|----------------|
| 2133           | 2105           | 2049           |
| 735            | 749            | 791            |
| 2191           | 2177           | 2051           |
| 3909           | 3783           | 3825           |
| 4132           | 4118           | 4174           |
| 1148           | 1274           | 1288           |
| 1363           | 1335           | 1405           |
| 2174           | 2216           | 2216           |
| 227            | 227            | 227            |
| 1938           | 1938           | 1966           |
| 3668           | 3654           | 3612           |
| 1592           | 1606           | 1620           |
| 2162           | 2232           | 2176           |
| 472            | 458            | 458            |
| 4996           | 4940           | 4968           |
| 2390           | 2376           | 2334           |
| 2165           | 2095           | 2109           |
| 1308           | 1322           | 1336           |
| 2118           | 2146           | 2188           |
| 798            | 840            | 798            |

| <b>AA</b>  | <b>Available (flux)</b> | <b>Normalized to 1: available/control flux</b> |
|------------|-------------------------|------------------------------------------------|
| <b>ARG</b> | 0.08                    | 3673.6                                         |
| <b>HIS</b> | 0.082                   | 3765.44                                        |
| <b>ILE</b> | 0.062                   | 2847.04                                        |
| <b>LEU</b> | 0.123                   | 5648.16                                        |
| <b>LYS</b> | 0.188                   | 8632.96                                        |
| <b>MET</b> | 0.025                   | 1148                                           |
| <b>PHE</b> | 0.057                   | 2617.44                                        |
| <b>THR</b> | 0.14                    | 6428.8                                         |
| <b>TRP</b> | 0.044                   | 2020.48                                        |
| <b>VAL</b> | 0.233                   | 10699.36                                       |
| <b>ALA</b> | 0.333                   | 15291.36                                       |
| <b>ASN</b> | 0.041                   | 1882.72                                        |
| <b>ASP</b> | 0.003                   | 137.76                                         |
| <b>CYS</b> | 0.052                   | 2387.84                                        |
| <b>GLU</b> | 0.024                   | 1102.08                                        |
| <b>GLN</b> | 0.586                   | 26909.12                                       |
| <b>GLY</b> | 0.23                    | 10561.6                                        |
| <b>PRO</b> | 0.168                   | 7714.56                                        |
| <b>SER</b> | 0.114                   | 5234.88                                        |
| <b>TYR</b> | 0.059                   | 2709.28                                        |

mmol

6.02E+23

| Initial Order | Essentiality | CE    | Needed | Available | Difference | Expected | Actual |
|---------------|--------------|-------|--------|-----------|------------|----------|--------|
| 6             | 1            | 1 MET | 1148   | 1148      | 0          | 1        | 1      |
| 3             | 1            | 1 ILE | 2191   | 2847      | 656        | 2        | 2      |
| 7             | 1            | 1 PHE | 1363   | 2617      | 1254       | 3        | 5      |
| 4             | 1            | 1 LEU | 3909   | 5648      | 1739       | 4        | 3      |
| 9             | 1            | 1 TRP | 227    | 2020      | 1793       | 5        | n/a    |
| 8             | 1            | 1 THR | 2174   | 6429      | 4255       | 6        | 7      |
| 5             | 1            | 1 LYS | 4132   | 8633      | 4501       | 7        | 6      |
| 10            | 1            | 1 VAL | 1938   | 10699     | 8761       | 8        | n/a    |
| 1             | 2            | 1 ARG | 2133   | 3674      | 1541       | 9        | 4      |
| 2             | 2            | 1 HIS | 735    | 3765      | 3030       | 10       | n/a    |
| 15            | 3            | 2 GLU | 4996   | 1102      | -3894      | 11       | n/a    |
| 13            | 3            | 2 ASP | 2162   | 138       | -2024      | 12       | n/a    |
| 12            | 3            | 2 ASN | 1592   | 1883      | 291        | 13       | n/a    |
| 20            | 3            | 2 TYR | 798    | 2709      | 1911       | 14       | n/a    |
| 14            | 3            | 2 CYS | 472    | 2388      | 1916       | 15       | n/a    |
| 19            | 3            | 2 SER | 2118   | 5235      | 3117       | 16       | n/a    |
| 18            | 3            | 2 PRO | 1308   | 7715      | 6407       | 17       | n/a    |
| 17            | 3            | 2 GLY | 2165   | 10562     | 8397       | 18       | n/a    |
| 11            | 3            | 2 ALA | 3668   | 15291     | 11623      | 19       | n/a    |
| 16            | 3            | 2 GLN | 2390   | 26909     | 24519      | 20       | n/a    |

**Essentiality Expect on I Expect on CE**

|    |    |    |
|----|----|----|
| e  | 1  | 1  |
| e  | 2  | 2  |
| e  | 3  | 3  |
| e  | 4  | 5  |
| e  | 5  | 6  |
| e  | 6  | 8  |
| e  | 7  | 9  |
| e  | 8  | 10 |
| ce | 9  | 4  |
| ce | 10 | 7  |
| ne | 11 | 11 |
| ne | 12 | 12 |
| ne | 13 | 13 |
| ne | 14 | 14 |
| ne | 15 | 15 |
| ne | 16 | 16 |
| ne | 17 | 17 |
| ne | 18 | 18 |
| ne | 19 | 19 |
| ne | 20 | 20 |
