# Supplementary material for: To Supplement or Not to Supplement: A Metabolic Network Framework for Human Nutritional Supplements
Source: PubMed Central journal article supplement (PMC3740736; doi:10.1371/journal.pone.0068751), 2013-08-05
Supplement: pone.0068751.s006.pdf [file pone.0068751.s006.pdf]

| Fasting    | Available | Type 2a<br>Control | Single<br>Methionin | Difference | Double<br>Met-Phe |
|------------|-----------|--------------------|---------------------|------------|-------------------|
| Prot Synth | n/a       | 2.61E-05           | 4.99E-05            |            | 5.39E-05          |
| ARG        | 0.115     | -0.056             | -0.106              |            | -0.115            |
| HIS        | 0.118     | -0.019             | -0.037              |            | -0.040            |
| ILE        | 0.128     | -0.057             | -0.128              |            | -0.128            |
| LEU        | 0.271     | -0.102             | -0.195              |            | -0.211            |
| LYS        | 0.294     | -0.108             | -0.206              |            | -0.223            |
| MET        | 0.030     | -0.030             | -0.057              |            | -0.062            |
| PHE        | 0.068     | -0.036             | -0.068              |            | -0.073            |
| THR        | 0.182     | -0.057             | -0.108              |            | -0.117            |
| TRP        | 0.044     | -0.006             | -0.011              |            | -0.012            |
| VAL        | 0.349     | -0.051             | -0.145              |            | -0.206            |
| ALA        | 0.309     | -0.309             | -0.309              |            | -0.309            |
| ASN        | 0.045     | -0.042             | -0.045              |            | -0.045            |
| ASP        | 0.067     | 0.000              | 0.000               |            | -0.067            |
| CYS        | 0.093     | -0.012             | -0.024              |            | -0.025            |
| GLU        | 0.152     | -0.152             | -0.152              |            | -0.152            |
| GLN        | 0.541     | -0.063             | -0.154              |            | -0.541            |
| GLY        | 0.281     | -0.057             | -0.108              |            | -0.117            |
| PRO        | 0.299     | -0.161             | -0.299              |            | -0.299            |
| SER        | 0.175     | 0.000              | -0.010              |            | -0.114            |
| TYR        | 0.092     | -0.021             | -0.040              |            | -0.043            |

|     | Available |        |       |       |       | 0-2 hr diff |
|-----|-----------|--------|-------|-------|-------|-------------|
|     | 0         | 1 2 HR |       | 3     | 4     |             |
| ARG | 0.061     | 0.098  | 0.120 | 0.106 | 0.092 | 0.059       |
| HIS | 0.092     | 0.105  | 0.155 | 0.105 | 0.106 | 0.063       |
| ILE | 0.067     | 0.105  | 0.144 | 0.155 | 0.137 | 0.077       |
| LEU | 0.14      | 0.205  | 0.271 | 0.282 | 0.247 | 0.131       |
| LYS | 0.189     | 0.277  | 0.328 | 0.281 | 0.259 | 0.139       |
| MET |           |        |       |       |       |             |
| PHE | 0.049     | 0.062  | 0.068 | 0.069 | 0.06  | 0.019       |
| THR | 0.149     | 0.185  | 0.214 | 0.212 | 0.19  | 0.065       |
| TRP |           |        |       |       |       |             |
| VAL | 0.238     | 0.3    | 0.359 | 0.395 | 0.366 | 0.121       |
| ALA | 0.271     | 0.34   | 0.345 | 0.324 | 0.289 | 0.074       |
| ASN |           |        |       |       |       |             |
| ASP | 0.115     | 0.114  | 0.114 | 0.116 | 0.112 | -0.001      |
| CYS |           |        |       |       |       |             |
| GLU | 0.145     | 0.148  | 0.152 | 0.148 | 0.149 | 0.007       |
| GLN | 0.658     | 0.662  | 0.676 | 0.653 | 0.66  | 0.018       |
| GLY | 0.352     | 0.387  | 0.377 | 0.367 | 0.345 | 0.025       |
| PRO | 0.179     | 0.223  | 0.231 | 0.227 | 0.211 | 0.052       |
| SER | 0.118     | 0.209  | 0.217 | 0.197 | 0.183 | 0.099       |
| TYR | 0.063     | 0.077  | 0.092 | 0.093 | 0.082 | 0.029       |

0.061

|            | Basal   |       |          |         | Postabsorptive |       |      |       |
|------------|---------|-------|----------|---------|----------------|-------|------|-------|
|            | Cynober | Aoki  | Pozefsky | Tessari | AVG            | STD   | Aoki |       |
| <b>ARG</b> | 0.08    | 0.061 | 0.075    | 0.073   | <b>0.072</b>   | 0.008 |      | 0.120 |
| <b>HIS</b> | 0.082   | 0.092 | 0.076    | 0.06    | <b>0.078</b>   | 0.013 |      | 0.155 |
| <b>ILE</b> | 0.062   | 0.067 | 0.056    | 0.053   | <b>0.060</b>   | 0.006 |      | 0.144 |
| <b>LEU</b> | 0.123   | 0.14  | 0.12     |         | <b>0.128</b>   | 0.011 |      | 0.271 |
| <b>LYS</b> | 0.188   | 0.189 | 0.172    | 0.144   | <b>0.173</b>   | 0.021 |      | 0.328 |
| <b>MET</b> | 0.025   |       | 0.021    | 0.014   | <b>0.020</b>   | 0.006 |      |       |
| <b>PHE</b> | 0.057   | 0.049 | 0.049    |         | <b>0.052</b>   | 0.005 |      | 0.068 |
| <b>THR</b> | 0.14    | 0.149 | 0.135    | 0.107   | <b>0.133</b>   | 0.018 |      | 0.214 |
| <b>TRP</b> | 0.044   |       | 0.038    |         | <b>0.041</b>   | 0.004 |      |       |
| <b>VAL</b> | 0.233   | 0.238 | 0.238    | 0.211   | <b>0.230</b>   | 0.013 |      | 0.359 |
| <b>ALA</b> | 0.333   | 0.271 | 0.231    | 0.24    | <b>0.269</b>   | 0.046 |      | 0.345 |
| <b>ASN</b> | 0.041   |       |          | 0.025   | <b>0.033</b>   | 0.011 |      |       |
| <b>ASP</b> | 0.003   | 0.115 |          | 0.016   | <b>0.045</b>   | 0.061 |      | 0.114 |
| <b>CYS</b> | 0.052   |       | 0.086    |         | <b>0.069</b>   | 0.024 |      |       |
| <b>GLU</b> | 0.024   | 0.145 |          | 0.152   | <b>0.107</b>   | 0.072 |      | 0.152 |
| <b>GLN</b> | 0.586   | 0.658 |          | 0.366   | <b>0.537</b>   | 0.152 |      | 0.676 |
| <b>GLY</b> | 0.23    | 0.352 | 0.179    | 0.191   | <b>0.238</b>   | 0.079 |      | 0.377 |
| <b>PRO</b> | 0.168   | 0.179 | 0.178    | 0.215   | <b>0.185</b>   | 0.021 |      | 0.231 |
| <b>SER</b> | 0.114   | 0.118 | 0.107    | 0.109   | <b>0.112</b>   | 0.005 |      | 0.217 |
| <b>TYR</b> | 0.059   | 0.063 | 0.054    | 0.047   | <b>0.056</b>   | 0.007 |      | 0.092 |

| Difference | Triple       |            | Quadruple       |            |
|------------|--------------|------------|-----------------|------------|
|            | Arg-Met-Phe- | Difference | Arg-Ile-Met-Phe | Difference |
|            | 5.84E-05     |            | 6.93E-05        |            |
|            | -0.1246      |            | -0.148          |            |
|            | -0.0429      |            | -0.051          |            |
|            | -0.1280      |            | -0.331          |            |
|            | -0.2710      |            | -0.271          |            |
|            | -0.2414      |            | -0.286          |            |
|            | -0.0671      |            | -0.080          |            |
|            | -0.0796      |            | -0.094          |            |
|            | -0.1270      |            | -0.151          |            |
|            | -0.0133      |            | -0.016          |            |
|            | -0.3490      |            | -0.134          |            |
|            | -0.3090      |            | -0.309          |            |
|            | 0.3510       |            | -0.045          |            |
|            | -0.0670      |            | 0.000           |            |
|            | -0.0276      |            | -0.033          |            |
|            | -0.1520      |            | -0.152          |            |
|            | -0.5410      |            | -0.231          |            |
|            | -0.1265      |            | -0.150          |            |
|            | -0.2990      |            | -0.299          |            |
|            | 0.1875       |            | -0.103          |            |
|            | -0.0466      |            | -0.055          |            |

| Cynober - Aoki | Mixed Meal (Tessari et al) |       |
|----------------|----------------------------|-------|
|                | Basal                      | Meal  |
| 0.054          | 0.073                      | 0.11  |
| 0.026          | 0.06                       | 0.081 |
| 0.061          | 0.053                      | 0.112 |
| 0.131          |                            |       |
| 0.105          | 0.144                      | 0.26  |
|                | 0.014                      | 0.03  |
| 0.019          |                            |       |
| 0.0325         | 0.107                      | 0.149 |
| 0.111          | 0.211                      | 0.339 |
| 0.0375         | 0.24                       | 0.272 |
|                | 0.025                      | 0.045 |
| -0.048         | 0.016                      | 0.02  |
| 0.007          | 0.152                      | 0.152 |
| -0.1175        | 0.366                      | 0.405 |
| -0.071         | 0.191                      | 0.185 |
| 0.12           | 0.215                      | 0.367 |
| 0.057          | 0.109                      | 0.133 |
| 0.0285         | 0.047                      | 0.091 |

0.035

(post insulin)

| Posefsky | Tessari | AVG          | STD   | Diff b/n AVG | %Dif |
|----------|---------|--------------|-------|--------------|------|
|          | 0.11    | <b>0.115</b> | 0.007 | 0.043        | 59%  |
|          | 0.081   | <b>0.118</b> | 0.052 | 0.041        | 52%  |
|          | 0.112   | <b>0.128</b> | 0.023 | 0.069        | 115% |
|          |         | <b>0.271</b> |       | 0.143        | 112% |
|          | 0.26    | <b>0.294</b> | 0.048 | 0.121        | 70%  |
|          | 0.03    | <b>0.030</b> |       | 0.010        | 50%  |
|          |         | <b>0.068</b> |       | 0.016        | 32%  |
|          | 0.149   | <b>0.182</b> | 0.046 | 0.049        | 37%  |
|          |         | <b>0.044</b> |       |              |      |
|          | 0.339   | <b>0.349</b> | 0.014 | 0.119        | 52%  |
|          | 0.272   | <b>0.309</b> | 0.052 | 0.040        | 15%  |
|          | 0.045   | <b>0.045</b> |       | 0.012        | 36%  |
|          | 0.02    | <b>0.067</b> | 0.066 | 0.022        | 50%  |
| 0.093    |         | <b>0.093</b> |       |              |      |
|          | 0.152   | <b>0.152</b> | 0.000 | 0.045        | 42%  |
|          | 0.405   | <b>0.541</b> | 0.192 | 0.004        | 1%   |
|          | 0.185   | <b>0.281</b> | 0.136 | 0.043        | 18%  |
|          | 0.367   | <b>0.299</b> | 0.096 | 0.114        | 62%  |
|          | 0.133   | <b>0.175</b> | 0.059 | 0.063        | 56%  |
|          | 0.091   | <b>0.092</b> | 0.001 | 0.036        | 64%  |

**Quintuple****Arg-Ile-Leu-Met-Phe    Difference**

7.12E-05  
-0.152  
-0.052  
-0.347  
-0.278  
-0.294  
-0.082  
-0.097  
-0.155  
-0.016  
-0.138  
-0.309  
-0.045  
0.000  
-0.034  
-0.152  
-0.238  
-0.154  
-0.299  
-0.111  
-0.057

**Hextuple****Arg-Ile-Leu-Lys-Met-Phe    Difference**

8.37E-05  
-0.1786  
-0.0615  
-0.4546  
-0.3272  
-0.3459  
-0.0961  
-0.1141  
-0.1820  
-0.0190  
-0.1622  
-0.3090  
-0.0450  
0.0000  
-0.0395  
-0.1520  
-0.2884  
-0.1812  
-0.2990  
-0.1639  
-0.0668

**Heptuple****Arg-Ile-Leu**

0.00013  
-0.277  
-0.095  
-1.035  
-0.507  
-0.536  
-0.149  
-0.280  
-0.282  
-0.029  
-0.349  
-0.309  
-0.045  
-0.067  
-0.061  
-0.152  
-0.472  
-0.281  
-0.299  
-0.175  
0.000

avg from Cynober

**-Lys-Met-Phe-Thr**

| Flux     | Control  | Met      | 1 | 2        | 3           |
|----------|----------|----------|---|----------|-------------|
|          |          |          |   | Met-Phe  | Arg-Met-Phe |
| Obj_atp  | 0        |          | 0 | 0        | 0           |
| Ex_ins   | 0        |          | 0 | 0        | 0           |
| Ex_gluc  | 0        |          | 0 | 0        | 0           |
| Ex_lac   | 0        |          | 0 | 0        | 0           |
| Ex_pyr   | 0        |          | 0 | 0        | 0           |
| Ex_pal   | 0        |          | 0 | 0        | 0           |
| Ex_prop  | 0        |          | 0 | 0        | 0           |
| Ex_but   | 0        |          | 0 | 0        | 0           |
| Ex_5c    | 0        |          | 0 | 0        | 0           |
| Ex_6c    | 0        |          | 0 | 0        | 0           |
| Ex_8c    | 0        |          | 0 | 0        | 0           |
| Ex_9c    | 0        |          | 0 | 0        | 0           |
| Ex_10c   | 0        |          | 0 | 0        | 0           |
| Ex_12c   | 0        |          | 0 | 0        | 0           |
| Ex_14c   | 0        |          | 0 | 0        | 0           |
| Ex_18c   | 0        |          | 0 | 0        | 0           |
| Ex_glyc  | 0        |          | 0 | 0        | 0           |
| Ex_tag   | 0        |          | 0 | 0        | 0           |
| Ex_dag   | 0        |          | 0 | 0        | 0           |
| Ex_mag   | 0        |          | 0 | 0        | 0           |
| Ex_akg   | 0        |          | 0 | 0        | 0           |
| Ex_oaa   | 0        |          | 0 | 0        | 0           |
| Ex_rib   | 0        |          | 0 | 0        | 0           |
| Nut_o2   | -0.3776  | -0.75931 |   | -0.8275  | -0.90385    |
| Nut_co2  | 0.240598 | 0.371894 |   | 0.374225 | 0.376835    |
| Nut_h2o  | 2.620854 | 4.991492 |   | 5.389164 | 5.834404    |
| Nut_p    | 0        |          | 0 | 0        | 0           |
| Nut_hco3 | 0        | -0.01869 |   | -0.00987 | 0           |
| Nut_coa  | 0        |          | 0 | 0        | 0           |
| Nut_carn | 0        |          | 0 | 0        | 0           |
| Nut_dhf  | 0        |          | 0 | 0        | 0           |
| LPL      | 0        |          | 0 | 0        | 0           |
| DAGL     | 0        |          | 0 | 0        | 0           |
| 12DAG    | 0        |          | 0 | 0        | 0           |
| MAGL     | 0        |          | 0 | 0        | 0           |
| GLUT4    | 0        |          | 0 | 0        | 0           |
| MCT4     | 0        |          | 0 | 0        | 0           |
| MCT_pyr  | 0        |          | 0 | 0        | 0           |
| FAT/CD36 | 0        |          | 0 | 0        | 0           |
| FATprop  | 0        |          | 0 | 0        | 0           |
| FATbut   | 0        |          | 0 | 0        | 0           |
| FAT5c    | 0        |          | 0 | 0        | 0           |
| FAT6c    | 0        |          | 0 | 0        | 0           |
| FAT8c    | 0        |          | 0 | 0        | 0           |
| FAT9c    | 0        |          | 0 | 0        | 0           |



|            |          |          |          |          |
|------------|----------|----------|----------|----------|
| FAT10c     | 0        | 0        | 0        | 0        |
| FAT12c     | 0        | 0        | 0        | 0        |
| FAT14c     | 0        | 0        | 0        | 0        |
| FAT18c     | 0        | 0        | 0        | 0        |
| Alc_glyc   | 0        | 0        | 0        | 0        |
| COA        | 0        | 0        | 0        | 0        |
| SLC22A5/O  | 0        | 0        | 0        | 0        |
| Xport_rib  | 0        | 0        | 0        | 0        |
| Dr_akg     | 0        | 0        | 0        | 0        |
| Dr_oaa     | 0        | 0        | 0        | 0        |
| Hex        | 0        | 0        | 0        | 0        |
| PGI        | 0        | 0        | 0        | 0        |
| PFK        | 0        | 0        | 0        | 0        |
| FBP        | 0        | 0        | 0        | 0        |
| Ald        | 0        | 0        | 0        | 0        |
| TPI        | 0        | 0        | 0        | 0        |
| D3PDeh     | 0        | 0        | 0        | 0        |
| PGK        | 0        | 0        | 0        | 0        |
| PGM        | -0.05535 | -0.09611 | -0.09854 | -0.10126 |
| Eno        | -0.05535 | -0.09611 | -0.09854 | -0.10126 |
| PyrK       | 0.036702 | 0        | 0        | 0        |
| PEPSynth   | 0        | 0        | 0        | 0        |
| PEPCarbK   | 0        | 0        | 0        | 0        |
| PEPCarbl   | 0.09205  | 0.096113 | 0.098542 | 0.101262 |
| LacDeh     | 0        | 0        | 0        | 0        |
| MalDehC(n  | 0.055348 | 0.096113 | 0.098542 | 0.101262 |
| ASTC       | 0.147398 | 0.192225 | 0.197084 | 0.202523 |
| G3PDehC    | 0        | 0        | 0        | 0        |
| Mal-AKGEX  | 0.055348 | 0.096113 | 0.098542 | 0.101262 |
| Glu-AspEx  | 0.203897 | 0.334512 | 0.354479 | 0.376835 |
| MCT        | 0        | 0        | 0        | 0        |
| ASTM       | 0.203897 | 0.334512 | 0.354479 | 0.376835 |
| G3PDehM    | 0        | 0        | 0        | 0        |
| PyrSynth/P | 0        | 0        | 0        | 0        |
| CitSynth   | 0        | 0.018691 | 0.009873 | 0        |
| Acon       | 0        | 0.018691 | 0.009873 | 0        |
| IsoDeh     | 0        | 0        | 0        | 0        |
| IsoDehnadj | 0        | 0.018691 | 0.009873 | 0        |
| AKGDeh     | 0.148548 | 0.18961  | 0.161827 | 0.130721 |
| SunCoaSyn  | 0.148548 | 0.257091 | 0.26581  | 0.275573 |
| SucDeh(I)  | 0.148548 | 0.257091 | 0.26581  | 0.275573 |
| Fum        | 0.148548 | 0.257091 | 0.26581  | 0.275573 |
| MalDehM    | 0.203897 | 0.353203 | 0.364352 | 0.376835 |
| NADHDeh(   | 0.479551 | 0.960308 | 1.056736 | 1.164698 |
| ETFUO      | 0.275654 | 0.558315 | 0.598273 | 0.643011 |
| UCytC(III) | 0.755204 | 1.518623 | 1.655009 | 1.807709 |
| CytCO(IV)  | 0.377602 | 0.759312 | 0.827505 | 0.903855 |



|           |   |   |   |   |
|-----------|---|---|---|---|
| St_TAG    | 0 | 0 | 0 | 0 |
| ACAS2     | 0 | 0 | 0 | 0 |
| ACSM-But  | 0 | 0 | 0 | 0 |
| ACSM-5c   | 0 | 0 | 0 | 0 |
| ACSM-6c   | 0 | 0 | 0 | 0 |
| ACSM-8c   | 0 | 0 | 0 | 0 |
| ACSM-9c   | 0 | 0 | 0 | 0 |
| ACSM-10c  | 0 | 0 | 0 | 0 |
| ACSM-12c  | 0 | 0 | 0 | 0 |
| ACSM-14c  | 0 | 0 | 0 | 0 |
| ACSM-18c  | 0 | 0 | 0 | 0 |
| CPT1B/CHK | 0 | 0 | 0 | 0 |
| CPT1B/CHK | 0 | 0 | 0 | 0 |
| CPT1B/CHK | 0 | 0 | 0 | 0 |
| CPT1B/CHK | 0 | 0 | 0 | 0 |
| CPT1B/CHK | 0 | 0 | 0 | 0 |
| CPT1B/CHK | 0 | 0 | 0 | 0 |
| CPT1B/CHK | 0 | 0 | 0 | 0 |
| CPT1B/CHK | 0 | 0 | 0 | 0 |
| CPT1B/CHK | 0 | 0 | 0 | 0 |
| CPT1B/CHK | 0 | 0 | 0 | 0 |
| CPT1B/CHK | 0 | 0 | 0 | 0 |
| SLC25A20/ | 0 | 0 | 0 | 0 |
| SLC25A20/ | 0 | 0 | 0 | 0 |
| SLC25A20/ | 0 | 0 | 0 | 0 |
| SLC25A20/ | 0 | 0 | 0 | 0 |
| SLC25A20/ | 0 | 0 | 0 | 0 |
| SLC25A20/ | 0 | 0 | 0 | 0 |
| SLC25A20/ | 0 | 0 | 0 | 0 |
| SLC25A20/ | 0 | 0 | 0 | 0 |
| SLC25A20/ | 0 | 0 | 0 | 0 |
| SLC25A20/ | 0 | 0 | 0 | 0 |
| CPT2      | 0 | 0 | 0 | 0 |
| CPT2      | 0 | 0 | 0 | 0 |
| CPT2      | 0 | 0 | 0 | 0 |
| CPT2      | 0 | 0 | 0 | 0 |
| CPT2      | 0 | 0 | 0 | 0 |
| CPT2      | 0 | 0 | 0 | 0 |
| CPT2      | 0 | 0 | 0 | 0 |
| CPT2      | 0 | 0 | 0 | 0 |
| CPT2      | 0 | 0 | 0 | 0 |
| CPT2      | 0 | 0 | 0 | 0 |
| AcylCoADe | 0 | 0 | 0 | 0 |
| EnoCoADel | 0 | 0 | 0 | 0 |
| 3HA-CoADe | 0 | 0 | 0 | 0 |
| AcylCoAAT | 0 | 0 | 0 | 0 |
| AcylCoADe | 0 | 0 | 0 | 0 |
| EnoCoADel | 0 | 0 | 0 | 0 |

|            |          |          |          |          |
|------------|----------|----------|----------|----------|
| 3HA-CoADe  | 0        | 0        | 0        | 0        |
| AcylCoAAT  | 0        | 0        | 0        | 0        |
| AcylCoADe  | 0        | 0        | 0        | 0        |
| EnoCoADel  | 0        | 0        | 0        | 0        |
| 3HA-CoADe  | 0        | 0        | 0        | 0        |
| AcylCoAAT  | 0        | 0        | 0        | 0        |
| AKR1A1     | 0        | 0        | 0        | 0        |
| ALDH3A2    | 0        | 0        | 0        | 0        |
| GLYCTK     | 0        | 0        | 0        | 0        |
| EAA_arg    | -0.05574 | -0.10642 | -0.115   | -0.12461 |
| EAA_his    | -0.01921 | -0.03667 | -0.03963 | -0.04294 |
| EAA_ile    | -0.05726 | -0.128   | -0.128   | -0.128   |
| EAA_leu    | -0.10215 | -0.19502 | -0.21075 | -0.22837 |
| EAA_lys    | -0.10798 | -0.20615 | -0.22278 | -0.24139 |
| EAA_met    | -0.03    | -0.05727 | -0.06189 | -0.06707 |
| EAA_phe    | -0.03562 | -0.068   | -0.07349 | -0.07963 |
| EAA_thr    | -0.05681 | -0.10846 | -0.11721 | -0.12701 |
| EAA_trp    | -0.00593 | -0.01133 | -0.01224 | -0.01326 |
| EAA_val    | -0.05064 | -0.14548 | -0.1986  | -0.25807 |
| NEAA_ala   | -0.309   | -0.309   | -0.309   | -0.309   |
| NEAA_asn   | -0.0416  | -0.045   | -0.045   | -0.045   |
| NEAA_asp   | 0        | 0        | 0        | 0        |
| NEAA_cys   | -0.01233 | -0.02355 | -0.02545 | -0.02757 |
| NEAA_glu   | -0.152   | -0.152   | -0.152   | -0.152   |
| NEAA_gln   | -0.06246 | -0.15366 | -0.16969 | -0.18763 |
| NEAA_gly   | -0.05658 | -0.10801 | -0.11673 | -0.12648 |
| NEAA_pro   | -0.16129 | -0.299   | -0.299   | -0.299   |
| NEAA_ser   | 0        | -0.00955 | -0.01565 | -0.02247 |
| NEAA_tyr   | -0.02085 | -0.03981 | -0.04302 | -0.04662 |
| DLDH       | 0        | 0.067481 | 0.103983 | 0.144852 |
| MT_val     | 0        | 0.04879  | 0.09411  | 0.144852 |
| BCAT2-val  | 0        | 0.04879  | 0.09411  | 0.144852 |
| BCKDHB-val | 0        | 0.04879  | 0.09411  | 0.144852 |
| BCKADE2-v  | 0        | 0.04879  | 0.09411  | 0.144852 |
| ACADSB     | 0        | 0.04879  | 0.09411  | 0.144852 |
| ECHS1      | 0        | 0.04879  | 0.09411  | 0.144852 |
| HIBCH      | 0        | 0.04879  | 0.09411  | 0.144852 |
| HIBADH     | 0        | 0.04879  | 0.09411  | 0.144852 |
| ALDH6A1    | 0        | 0.04879  | 0.09411  | 0.144852 |
| PCCB       | 0        | 0.067481 | 0.103983 | 0.144852 |
| MCEE       | 0        | 0.067481 | 0.103983 | 0.144852 |
| MUT        | 0        | 0.067481 | 0.103983 | 0.144852 |
| MT_ile     | 0        | 0.018691 | 0.009873 | 0        |
| BCAT-ile   | 0        | 0.018691 | 0.009873 | 0        |
| BCKDHB-ile | 0        | 0.018691 | 0.009873 | 0        |
| BCKADE2-il | 0        | 0.018691 | 0.009873 | 0        |
| ECHS1      | 0        | 0.018691 | 0.009873 | 0        |

|            |          |          |          |          |
|------------|----------|----------|----------|----------|
| HSD17B10   | 0        | 0.018691 | 0.009873 | 0        |
| ACAT1      | 0        | 0.018691 | 0.009873 | 0        |
| MT_leu     | 0        | 0        | 0        | 0        |
| BCAT2-leu  | 0        | 0        | 0        | 0        |
| BCKDHB-le  | 0        | 0        | 0        | 0        |
| BCKADE2-li | 0        | 0        | 0        | 0        |
| IVD        | 0        | 0        | 0        | 0        |
| MCC1,MCC   | 0        | 0        | 0        | 0        |
| MGCA       | 0        | 0        | 0        | 0        |
| HMGCL      | 0        | 0        | 0        | 0        |
| OXCT       | 0        | 0        | 0        | 0        |
| HMGCS2     | 0        | 0        | 0        | 0        |
| GluDeh     | 0        | 0        | 0        | 0        |
| GlnSynth   | 0        | 0        | 0        | 0        |
| GLN_Elim   | 0        | 0        | 0        | 0        |
| ALT        | 0.036702 | 0        | 0        | 0        |
| ALA_Elim   | 0.249848 | 0.126004 | 0.111241 | 0.094712 |
| SDS        | 0        | 0        | 0        | 0        |
| CBS        | 0        | 0        | 0        | 0        |
| CTH        | 0        | 0        | 0        | 0        |
| ILVBL      | 0        | 0        | 0        | 0        |
| 2a2hButLe: | 0        | 0        | 0        | 0        |
| MT_lys     | 0        | 0        | 0        | 0        |
| AASS       | 0        | 0        | 0        | 0        |
| AASS       | 0        | 0        | 0        | 0        |
| aAASADeh   | 0        | 0        | 0        | 0        |
| KATII      | 0        | 0        | 0        | 0        |
| lysdeg     | 0        | 0        | 0        | 0        |
| GCDH       | 0        | 0        | 0        | 0        |
| MT_pro     | 0.127106 | 0.233744 | 0.22848  | 0.222586 |
| PRODH      | 0.127106 | 0.252435 | 0.238353 | 0.222586 |
| ALDH4a1    | 0.127106 | 0.233744 | 0.22848  | 0.222586 |
| GATM       | 0        | 0        | 0        | 0        |
| Dr_orn     | 0        | 0        | 0        | 0        |
| GAMT       | 0        | 0        | 0        | 0        |
| Dr_cr      | 0        | 0        | 0        | 0        |
| AdoHcyase  | 0        | 0        | 0        | 0        |
| MTR        | 0        | 0        | 0        | 0        |
| AdoMet     | 0        | 0        | 0        | 0        |
| SHMT       | 0        | 0        | 0        | 0        |
| MTHFR      | 0        | 0        | 0        | 0        |
| DHFR       | 0        | 0        | 0        | 0        |
| HAL        | 0        | 0        | 0        | 0        |
| FLJ31300   | 0        | 0        | 0        | 0        |
| MGC35366   | 0        | 0        | 0        | 0        |
| FTCD1      | 0        | 0        | 0        | 0        |
| FTCD2      | 0        | 0        | 0        | 0        |

|          |          |          |          |          |
|----------|----------|----------|----------|----------|
| FT       | 0        | 0        | 0        | 0        |
| ASNase   | 0        | 0        | 0        | 0        |
| ASNSynth | 0        | 0.034425 | 0.040832 | 0.048006 |
| PHGDH    | 0.055348 | 0.096113 | 0.098542 | 0.101262 |
| PSA      | 0.055348 | 0.096113 | 0.098542 | 0.101262 |
| PSPH     | 0.055348 | 0.096113 | 0.098542 | 0.101262 |
| P5CS     | 0        | 0        | 0        | 0        |
| PYCS     | 0        | 0        | 0        | 0        |
| Spont    | 0        | 0        | 0        | 0        |
| PYRCR1   | 0        | 0.018691 | 0.009873 | 0        |
| PAG      | 0        | 0        | 0        | 0        |
| PCBD     | 0        | 0        | 0        | 0        |
| QDPR     | 0        | 0        | 0        | 0        |
| MT_glu   | 0.127106 | 0.301225 | 0.332463 | 0.367438 |
| tRNA     | 0        | 0        | 0        | 0        |
| YARS     | 0.020854 | 0.039812 | 0.043024 | 0.04662  |
| WARS     | 0.005932 | 0.011325 | 0.012239 | 0.013262 |
| TARS     | 0.056812 | 0.108461 | 0.117211 | 0.127007 |
| LARS     | 0.102152 | 0.19502  | 0.210752 | 0.228367 |
| IARS     | 0.057256 | 0.109309 | 0.118127 | 0.128    |
| KARS     | 0.107979 | 0.206145 | 0.222775 | 0.241395 |
| AARS     | 0.095854 | 0.182996 | 0.197759 | 0.214288 |
| VARS     | 0.050645 | 0.096687 | 0.104487 | 0.11322  |
| MARS     | 0.03     | 0.057274 | 0.061894 | 0.067067 |
| SARS     | 0.055348 | 0.105667 | 0.114191 | 0.123735 |
| DARS     | 0.056498 | 0.107862 | 0.116564 | 0.126306 |
| GARS     | 0.056577 | 0.108012 | 0.116725 | 0.126481 |
| PARS     | 0.034181 | 0.065256 | 0.07052  | 0.076414 |
| CARS     | 0.012334 | 0.023548 | 0.025448 | 0.027575 |
| EPRS     | 0.130557 | 0.24925  | 0.269358 | 0.29187  |
| QARS     | 0.062456 | 0.119237 | 0.128856 | 0.139626 |
| RARS     | 0.05574  | 0.106415 | 0.115    | 0.124612 |
| FARS     | 0.035618 | 0.068    | 0.073486 | 0.079628 |
| HARS     | 0.019207 | 0.036669 | 0.039627 | 0.042939 |
| NARS     | 0.041603 | 0.079425 | 0.085832 | 0.093006 |
| ACT      | 0.000183 | 0.000349 | 0.000377 | 0.000409 |
| MYOHC1-2 | 0        | 0        | 0        | 0        |
| MYOHC2a  | 0.000366 | 0.000698 | 0.000755 | 0.000818 |
| MYOHC2b  | 0        | 0        | 0        | 0        |
| MYOLCk   | 0.000366 | 0.000698 | 0.000755 | 0.000818 |
| MYOLCp   | 0.000366 | 0.000698 | 0.000755 | 0.000818 |
| MYO1-2x  | 0        | 0        | 0        | 0        |
| MYO2a    | 0.000183 | 0.000349 | 0.000377 | 0.000409 |
| MYO2x    | 0        | 0        | 0        | 0        |
| MYO2b    | 0        | 0        | 0        | 0        |
| TMN1     | 0        | 0        | 0        | 0        |
| TMN2     | 5.23E-05 | 9.98E-05 | 1.08E-04 | 0.000117 |

|             |          |          |          |          |
|-------------|----------|----------|----------|----------|
| DIM-TMN1    | 0        | 0        | 0        | 0        |
| DIM-TMN2    | 2.61E-05 | 4.99E-05 | 5.39E-05 | 5.84E-05 |
| TPNC1       | 0        | 0        | 0        | 0        |
| TPNC2       | 2.61E-05 | 4.99E-05 | 5.39E-05 | 5.84E-05 |
| TPNI1       | 0        | 0        | 0        | 0        |
| TPNI2       | 2.61E-05 | 4.99E-05 | 5.39E-05 | 5.84E-05 |
| TPNT1       | 0        | 0        | 0        | 0        |
| TPNT2       | 2.61E-05 | 4.99E-05 | 5.39E-05 | 5.84E-05 |
| TPN1        | 0        | 0        | 0        | 0        |
| TPN2        | 2.61E-05 | 4.99E-05 | 5.39E-05 | 5.84E-05 |
| CONTR-CO    | 0        | 0        | 0        | 0        |
| CONTR-CO    | 2.61E-05 | 4.99E-05 | 5.39E-05 | 5.84E-05 |
| CONTR-CO    | 0        | 0        | 0        | 0        |
| CONTR-CO    | 0        | 0        | 0        | 0        |
| Str_CONTR   | 0        | 0        | 0        | 0        |
| Str_CONTR   | 2.61E-05 | 4.99E-05 | 5.39E-05 | 5.84E-05 |
| Str_CONTR   | 0        | 0        | 0        | 0        |
| Str_CONTR   | 0        | 0        | 0        | 0        |
| CKM         | 0        | 0        | 0        | 0        |
| Spont       | 0        | 0        | 0        | 0        |
| Nut_cr      | 0        | 0        | 0        | 0        |
| ATP2UTP     | 0        | 0        | 0        | 0        |
| UDP2ADP     | 0        | 0        | 0        | 0        |
| PGM1        | 0        | 0        | 0        | 0        |
| UGP2        | 0        | 0        | 0        | 0        |
| mGYG        | 0        | 0        | 0        | 0        |
| mGYS1       | 0        | 0        | 0        | 0        |
| G6PD        | 0        | 0        | 0        | 0        |
| PGLS        | 0        | 0        | 0        | 0        |
| PGD         | 0        | 0        | 0        | 0        |
| PGD         | 0        | 0        | 0        | 0        |
| RPE         | 0        | 0        | 0.00E+00 | 0        |
| RPIA        | 0        | 0        | 0.00E+00 | 0        |
| TKT1        | 0        | 0        | 0.00E+00 | 0        |
| TKT2        | 0        | 0        | 0.00E+00 | 0        |
| TALDO       | 0        | 0        | 0.00E+00 | 0        |
| RBSK        | 0        | 0        | 0        | 0        |
| GCL         | 0        | 0        | 0        | 0        |
| GSS         | 0        | 0        | 0        | 0        |
| glutathxpo  | 0        | 0        | 0        | 0        |
| GSR         | 0        | 0        | 0        | 0        |
| GSR         | 0        | 0        | 0        | 0        |
| GlutathLea  | 0        | 0        | 0        | 0        |
| GlutathLea  | 0        | 0        | 0        | 0        |
| Recycle_na  | 0        | 0        | 0        | 0        |
| fa-c6 leak  | 0        | 0        | 0        | 0        |
| acetyLeak(i | 0        | 0        | 0        | 0        |





|          |          |          |          |          |
|----------|----------|----------|----------|----------|
| 0        | 0        | 0        | 0        | 0        |
| 0        | 0        | 0        | 0        | 0        |
| 0        | 0        | 0        | 0        | 0        |
| 0        | 0        | 0        | 0        | 0        |
| 0        | 0        | 0        | 0        | 0        |
| 0        | 0        | 0        | 0        | 0        |
| 0        | 0        | 0        | 0        | 0        |
| 0        | 0        | 0        | 0        | 0        |
| 0        | 0        | 0        | 0        | 0        |
| 0        | 0        | 0        | 0.266977 | 0.266977 |
| 0        | 0        | 0        | 0        | 0        |
| 0        | 0        | 0        | 0.154322 | 0.154322 |
| 0        | 0        | 0        | 0.154322 | 0.154322 |
| 0        | 0        | 0        | 0.154322 | 0.154322 |
| 0        | 0        | 0        | 0        | 0        |
| 0        | 0        | 0        | 0.154322 | 0.154322 |
| 0        | 0        | 0        | -0.11266 | -0.11266 |
| 0        | 0        | 0        | 0.266977 | 0.266977 |
| 0        | 0        | 0        | 0.266977 | 0.266977 |
| -0.0436  | -0.03977 | -0.0134  | 0.167078 | 0.222426 |
| -0.0436  | -0.03977 | -0.0134  | 0.167078 | 0.222426 |
| 0        | 0        | 0        | 0.167078 | 0.130376 |
| 0        | 0        | 0        | 0        | 0        |
| 0        | 0        | 0        | 0        | 0        |
| 0.043605 | 0.039775 | 0.013402 | 0        | -0.09205 |
| 0        | 0        | 0        | 0        | 0        |
| 0.043605 | 0.039775 | 0.013402 | 0.221636 | 0.166288 |
| 0.08721  | 0.07955  | 0.026804 | 0.221636 | 0.074238 |
| 0        | 0        | 0        | 0.041667 | 0.041667 |
| 0.043605 | 0.039775 | 0.013402 | 0.221636 | 0.166288 |
| 0.302464 | 0.301654 | 0.296077 | 0.596876 | 0.392979 |
| 0        | 0        | 0        | 0        | 0        |
| 0.302464 | 0.301654 | 0.296077 | 0.596876 | 0.392979 |
| 0        | 0        | 0        | 0        | 0        |
| 0        | 0        | 0        | 0        | 0        |
| 0.179529 | 0.191148 | 0.271147 | 0.750335 | 0.750335 |
| 0.179529 | 0.191148 | 0.271147 | 0.750335 | 0.750335 |
| 0        | 0        | 0        | 0        | 0        |
| 0.179529 | 0.191148 | 0.271147 | 0.750335 | 0.750335 |
| 0.258859 | 0.261879 | 0.282674 | 0.277777 | 0.129229 |
| 0.438388 | 0.453027 | 0.553822 | 1.125575 | 0.977026 |
| 0.438388 | 0.453027 | 0.553822 | 1.125575 | 0.977026 |
| 0.438388 | 0.453027 | 0.553822 | 1.125575 | 0.977026 |
| 0.481993 | 0.492802 | 0.567224 | 1.347211 | 1.143314 |
| 1.308231 | 1.342909 | 1.581691 | 3.547278 | 3.067727 |
| 0.826237 | 0.850108 | 1.014468 | 2.102604 | 1.82695  |
| 2.134468 | 2.193017 | 2.596159 | 5.649882 | 4.894678 |
| 1.067234 | 1.096509 | 1.298079 | 2.824941 | 2.447339 |









|          |          |          |          |          |
|----------|----------|----------|----------|----------|
| 0        | 0        | 0        | 0        | 0        |
| 0        | 0        | 0        | 0        | 0        |
| 0.065369 | 0.068274 | 0.088277 | 0.161629 | 0.161629 |
| 0.043605 | 0.039775 | 0.013402 | 0.0999   | 0.044551 |
| 0.043605 | 0.039775 | 0.013402 | 0.0999   | 0.044551 |
| 0.043605 | 0.039775 | 0.013402 | 0.0999   | 0.044551 |
| 0        | 0        | 0        | 0        | 0        |
| 0        | 0        | 0        | 0        | 0        |
| 0        | 0        | 0        | 0        | 0        |
| 0.179529 | 0.191148 | 0.271147 | 0.750335 | 0.750335 |
| 0        | 0        | 0        | 0.103574 | 0.103574 |
| 0        | 0        | 0        | 0.103574 | 0.103574 |
| 0        | 0        | 0        | 0.103574 | 0.103574 |
| 0.387849 | 0.397081 | 0.460646 | 0.97703  | 0.849924 |
| 0        | 0        | 0        | 0        | 0        |
| 0.055323 | 0.056779 | 0.066806 | 0.103574 | 0.08272  |
| 0.015737 | 0.016152 | 0.019004 | 0.029463 | 0.023531 |
| 0.150717 | 0.154684 | 0.182    | 0.282168 | 0.225356 |
| 0.271    | 0.278133 | 0.327248 | 0.507358 | 0.405206 |
| 0.151896 | 0.155894 | 0.183423 | 0.284375 | 0.227118 |
| 0.28646  | 0.294    | 0.345917 | 0.536301 | 0.428322 |
| 0.254292 | 0.260985 | 0.307073 | 0.476078 | 0.380224 |
| 0.134356 | 0.137893 | 0.162243 | 0.251537 | 0.200893 |
| 0.079588 | 0.081682 | 0.096107 | 0.149001 | 0.119001 |
| 0.146835 | 0.1507   | 0.177312 | 0.2749   | 0.219551 |
| 0.149885 | 0.153831 | 0.180995 | 0.280611 | 0.224112 |
| 0.150093 | 0.154044 | 0.181247 | 0.281    | 0.224423 |
| 0.09068  | 0.093067 | 0.109501 | 0.169768 | 0.135587 |
| 0.032722 | 0.033584 | 0.039514 | 0.061262 | 0.048927 |
| 0.346359 | 0.355475 | 0.418248 | 0.648442 | 0.517884 |
| 0.165692 | 0.170053 | 0.200083 | 0.310203 | 0.247747 |
| 0.147875 | 0.151767 | 0.178568 | 0.276847 | 0.221106 |
| 0.094493 | 0.09698  | 0.114106 | 0.176907 | 0.141288 |
| 0.050955 | 0.052297 | 0.061532 | 0.095397 | 0.07619  |
| 0.110369 | 0.113274 | 0.133277 | 0.206629 | 0.165026 |
| 0.000485 | 0.000498 | 0.000586 | 0.000909 | 0.000726 |
| 0        | 0        | 0        | 0        | 0        |
| 0.000971 | 0.000996 | 0.001172 | 0.001817 | 0.001451 |
| 0        | 0        | 0        | 0        | 0        |
| 0.000971 | 0.000996 | 0.001172 | 0.001817 | 0.001451 |
| 0.000971 | 0.000996 | 0.001172 | 0.001817 | 0.001451 |
| 0        | 0        | 0        | 0        | 0        |
| 0.000485 | 0.000498 | 0.000586 | 0.000909 | 0.000726 |
| 0        | 0        | 0        | 0        | 0        |
| 0        | 0        | 0        | 0        | 0        |
| 0        | 0        | 0        | 0        | 0        |
| 0.000139 | 0.000142 | 0.000167 | 0.00026  | 0.000207 |







|     | <b>actin</b> | <b>myoHC1-2</b> | <b>myoHC2a</b> | <b>myoHC2b</b> | <b>myoLCk</b> | <b>myoLCp</b> | <b>tmn1</b> | <b>tmn2</b> |
|-----|--------------|-----------------|----------------|----------------|---------------|---------------|-------------|-------------|
| arg | 18           | 104             | 106            | 100            | 24            | 7             | 14          | 20          |
| his | 9            | 37              | 36             | 40             | 10            | 1             | 2           | 2           |
| ile | 30           | 103             | 104            | 94             | 24            | 10            | 12          | 12          |
| leu | 26           | 191             | 200            | 194            | 50            | 9             | 34          | 28          |
| lys | 19           | 208             | 209            | 212            | 52            | 16            | 38          | 25          |
| met | 17           | 55              | 46             | 56             | 18            | 7             | 8           | 5           |
| phe | 12           | 56              | 58             | 61             | 20            | 12            | 1           | 1           |
| thr | 27           | 101             | 98             | 101            | 30            | 11            | 8           | 11          |
| trp | 4            | 9               | 9              | 9              | 4             | 1             | 0           | 0           |
| val | 21           | 84              | 84             | 86             | 31            | 10            | 7           | 10          |
| ala | 29           | 171             | 172            | 168            | 56            | 12            | 38          | 28          |
| asn | 12           | 76              | 75             | 77             | 24            | 7             | 7           | 6           |
| asp | 22           | 98              | 93             | 94             | 30            | 15            | 19          | 14          |
| cys | 6            | 17              | 18             | 17             | 10            | 2             | 1           | 3           |
| glu | 28           | 261             | 265            | 263            | 48            | 15            | 61          | 54          |
| gln | 11           | 130             | 131            | 127            | 23            | 7             | 15          | 15          |
| gly | 28           | 72              | 77             | 73             | 48            | 13            | 3           | 4           |
| pro | 19           | 31              | 30             | 32             | 47            | 6             | 0           | 0           |
| ser | 23           | 94              | 92             | 97             | 39            | 6             | 11          | 7           |
| tyr | 16           | 41              | 38             | 38             | 8             | 2             | 6           | 3           |

| <b>tpnc1</b> | <b>tpnc2</b> | <b>tpni1</b> | <b>tpni2</b> | <b>tpnt1</b> | <b>tpnt2</b> | <b>Type 1</b> |
|--------------|--------------|--------------|--------------|--------------|--------------|---------------|
| 4            | 7            | 19           | 17           | 29           | 25           | 2096          |
| 0            | 1            | 4            | 5            | 5            | 4            | 748           |
| 9            | 10           | 4            | 5            | 10           | 10           | 2175          |
| 13           | 9            | 22           | 17           | 19           | 19           | 3804          |
| 13           | 9            | 24           | 23           | 32           | 39           | 4142          |
| 11           | 11           | 8            | 10           | 7            | 4            | 1281          |
| 9            | 10           | 2            | 3            | 6            | 4            | 1335          |
| 7            | 6            | 6            | 4            | 4            | 7            | 2210          |
| 0            | 0            | 2            | 1            | 3            | 2            | 229           |
| 8            | 7            | 13           | 8            | 11           | 6            | 1943          |
| 7            | 12           | 15           | 13           | 20           | 24           | 3667          |
| 5            | 3            | 3            | 5            | 3            | 4            | 1607          |
| 23           | 19           | 10           | 11           | 12           | 18           | 2239          |
| 2            | 1            | 3            | 3            | 1            | 0            | 456           |
| 23           | 26           | 22           | 25           | 54           | 49           | 4953          |
| 5            | 5            | 4            | 8            | 16           | 16           | 2372          |
| 12           | 13           | 6            | 7            | 12           | 9            | 2094          |
| 2            | 2            | 7            | 5            | 18           | 6            | 1336          |
| 5            | 7            | 11           | 10           | 11           | 8            | 2156          |
| 3            | 2            | 2            | 2            | 5            | 4            | 848           |

| <b>Type 2a</b> | <b>Type 2x</b> | <b>Type 2b</b> |
|----------------|----------------|----------------|
| 2133           | 2105           | 2049           |
| 735            | 749            | 791            |
| 2191           | 2177           | 2051           |
| 3909           | 3783           | 3825           |
| 4132           | 4118           | 4174           |
| 1148           | 1274           | 1288           |
| 1363           | 1335           | 1405           |
| 2174           | 2216           | 2216           |
| 227            | 227            | 227            |
| 1938           | 1938           | 1966           |
| 3668           | 3654           | 3612           |
| 1592           | 1606           | 1620           |
| 2162           | 2232           | 2176           |
| 472            | 458            | 458            |
| 4996           | 4940           | 4968           |
| 2390           | 2376           | 2334           |
| 2165           | 2095           | 2109           |
| 1308           | 1322           | 1336           |
| 2118           | 2146           | 2188           |
| 798            | 840            | 798            |

| <b>AA</b>  | <b>Available (flux)</b> | <b>Normalized to 1: available/control flux</b> |
|------------|-------------------------|------------------------------------------------|
| <b>ARG</b> | 0.08                    | 3061.381                                       |
| <b>HIS</b> | 0.082                   | 3137.915                                       |
| <b>ILE</b> | 0.062                   | 2372.57                                        |
| <b>LEU</b> | 0.123                   | 4706.873                                       |
| <b>LYS</b> | 0.188                   | 7194.245                                       |
| <b>MET</b> | 0.025                   | 956.6815                                       |
| <b>PHE</b> | 0.057                   | 2181.234                                       |
| <b>THR</b> | 0.14                    | 5357.416                                       |
| <b>TRP</b> | 0.044                   | 1683.759                                       |
| <b>VAL</b> | 0.233                   | 8916.271                                       |
| <b>ALA</b> | 0.333                   | 12743                                          |
| <b>ASN</b> | 0.041                   | 1568.958                                       |
| <b>ASP</b> | 0.003                   | 114.8018                                       |
| <b>CYS</b> | 0.052                   | 1989.897                                       |
| <b>GLU</b> | 0.024                   | 918.4142                                       |
| <b>GLN</b> | 0.586                   | 22424.61                                       |
| <b>GLY</b> | 0.23                    | 8801.469                                       |
| <b>PRO</b> | 0.168                   | 6428.899                                       |
| <b>SER</b> | 0.114                   | 4362.467                                       |
| <b>TYR</b> | 0.059                   | 2257.768                                       |

mmol

6.02E+23

| Initial Order | Essentiality | CE | Needed     | Available | Difference | Fed   | Actual |     |
|---------------|--------------|----|------------|-----------|------------|-------|--------|-----|
| 6             | 1            | 1  | <b>MET</b> | 1148      | 957        | -191  | 1      | 1   |
| 3             | 1            | 1  | <b>ILE</b> | 2191      | 2373       | 182   | 2      | 4   |
| 4             | 1            | 1  | <b>LEU</b> | 3909      | 4707       | 798   | 3      | 5   |
| 7             | 1            | 1  | <b>PHE</b> | 1363      | 2181       | 818   | 4      | 2   |
| 9             | 1            | 1  | <b>TRP</b> | 227       | 1684       | 1457  | 5      | n/a |
| 5             | 1            | 1  | <b>LYS</b> | 4132      | 7194       | 3062  | 6      | 6   |
| 8             | 1            | 1  | <b>THR</b> | 2174      | 5357       | 3183  | 7      | 7   |
| 10            | 1            | 1  | <b>VAL</b> | 1938      | 8916       | 6978  | 8      | n/a |
| 1             | 1            | 1  | <b>ARG</b> | 2133      | 3061       | 928   | 9      | 3   |
| 2             | 1            | 1  | <b>HIS</b> | 735       | 3138       | 2403  | 10     | n/a |
| 15            | 3            | 2  | <b>GLU</b> | 4996      | 918        | -4078 | 11     | n/a |
| 13            | 3            | 2  | <b>ASP</b> | 2162      | 115        | -2047 | 12     | n/a |
| 12            | 3            | 2  | <b>ASN</b> | 1592      | 1569       | -23   | 13     | n/a |
| 20            | 3            | 2  | <b>TYR</b> | 798       | 2258       | 1460  | 14     | n/a |
| 14            | 3            | 2  | <b>CYS</b> | 472       | 1990       | 1518  | 15     | n/a |
| 19            | 3            | 2  | <b>SER</b> | 2118      | 4362       | 2244  | 16     | n/a |
| 18            | 3            | 2  | <b>PRO</b> | 1308      | 6429       | 5121  | 17     | n/a |
| 17            | 3            | 2  | <b>GLY</b> | 2165      | 8801       | 6636  | 18     | n/a |
| 11            | 3            | 2  | <b>ALA</b> | 3668      | 12743      | 9075  | 19     | n/a |
| 16            | 3            | 2  | <b>GLN</b> | 2390      | 22425      | 20035 | 20     | n/a |

**Essentiality Expect on I Basal**

|    |    |    |
|----|----|----|
| e  | 1  | 3  |
| e  | 2  | 5  |
| e  | 3  | 8  |
| e  | 4  | 6  |
| e  | 5  | 9  |
| e  | 6  | 15 |
| e  | 7  | 14 |
| e  | 8  | 18 |
| ce | 9  | 7  |
| ce | 10 | 12 |
| ne | 11 | 1  |
| ne | 12 | 2  |
| ne | 13 | 4  |
| ne | 14 | 10 |
| ne | 15 | 11 |
| ne | 16 | 13 |
| ne | 17 | 16 |
| ne | 18 | 17 |
| ne | 19 | 19 |
| ne | 20 | 20 |
