# Supplementary material for: To Supplement or Not to Supplement: A Metabolic Network Framework for Human Nutritional Supplements
Source: PubMed Central journal article supplement (PMC3740736; doi:10.1371/journal.pone.0068751), 2013-08-05
Supplement: pone.0068751.s007.pdf [file pone.0068751.s007.pdf]

**Table 1** Table of the contractile protein complexes in different types of muscle tissue used for the model.

| <b>Muscle Type</b> | <b>Protein</b>               | <b>GI (from NCBI)</b> |
|--------------------|------------------------------|-----------------------|
| Type 1             | Actin                        | 4501881               |
|                    | Myosin Heavy Chain type 1/2x | 115527082             |
|                    | Myosin Light Chain Kinase    | 14993776              |
|                    | Myosin Light Chain Phosph.   | 28372499              |
|                    | Tropomyosin type 1           | 114155140             |
|                    | Troponin C type 1            | 4507615               |
|                    | Troponin I type 1            | 56682969              |
|                    | Troponin T type 1            | 187173288             |
| Type 2a            | Actin                        | 4501881               |
|                    | Myosin Heavy Chain type 2a   | 153792663             |
|                    | Myosin Light Chain Kinase    | 14993776              |
|                    | Myosin Light Chain Phosph.   | 28372499              |
|                    | Tropomyosin type 2           | 114155144             |
|                    | Troponin C type 2            | 4507617               |
|                    | Troponin I type 2            | 4507621               |
|                    | Troponin T type 2            | 5803203               |
| Type 2x            | Actin                        | 4501881               |
|                    | Myosin Heavy Chain type 1/2x | 115527082             |
|                    | Myosin Light Chain Kinase    | 14993776              |
|                    | Myosin Light Chain Phosph.   | 28372499              |
|                    | Tropomyosin type 2           | 114155144             |
|                    | Troponin C type 2            | 4507617               |
|                    | Troponin I type 2            | 4507621               |
|                    | Troponin T type 2            | 5803203               |
| Type 2b            | Actin                        | 4501881               |
|                    | Myosin Heavy Chain type 1/2x | 110611903             |
|                    | Myosin Light Chain Kinase    | 14993776              |
|                    | Myosin Light Chain Phosph.   | 28372499              |
|                    | Tropomyosin type 2           | 114155144             |
|                    | Troponin C type 2            | 4507617               |
|                    | Troponin I type 2            | 4507621               |
|                    | Troponin T type 2            | 5803203               |
