# Supplementary material for: To Supplement or Not to Supplement: A Metabolic Network Framework for Human Nutritional Supplements
Source: PubMed Central journal article supplement (PMC3740736; doi:10.1371/journal.pone.0068751), 2013-08-05
Supplement: pone.0068751.s008.pdf [file pone.0068751.s008.pdf]

**Table S2** Amino Acids Needed Compared to the Amino Acids Available to produce one contractile protein complex in Type 2a

- ce – conditionally essential
- E – essential
- ne – non-essential

**Table S2A** Fasting state ranked by difference

| AA  | Needed | Available | Difference | Rank | Actual Effect | Supplementation | AA Essentiality |
|-----|--------|-----------|------------|------|---------------|-----------------|-----------------|
| GLU | 4996   | 1102      | -3894      | 1    | n/a           |                 | ne              |
| ASP | 2162   | 138       | -2024      | 2    | n/a           |                 | ne              |
| MET | 1148   | 1148      | 0          | 3    | 1             |                 | e               |
| ASN | 1592   | 1883      | 291        | 4    | n/a           |                 | ne              |
| ILE | 2191   | 2847      | 656        | 5    | 2             |                 | e               |
| PHE | 1363   | 2617      | 1254       | 6    | 5             |                 | e               |
| ARG | 2133   | 3674      | 1541       | 7    | 4             |                 | ce              |
| LEU | 3909   | 5648      | 1739       | 8    | 3             |                 | e               |
| TRP | 227    | 2020      | 1793       | 9    | n/a           |                 | e               |
| TYR | 798    | 2709      | 1911       | 10   | n/a           |                 | ne              |
| CYS | 472    | 2388      | 1916       | 11   | n/a           |                 | ne              |
| HIS | 735    | 3765      | 3030       | 12   | n/a           |                 | ce              |
| SER | 2118   | 5235      | 3117       | 13   | n/a           |                 | ne              |
| THR | 2174   | 6429      | 4255       | 14   | 7             |                 | e               |
| LYS | 4132   | 8633      | 4501       | 15   | 6             |                 | e               |
| PRO | 1308   | 7715      | 6407       | 16   | n/a           |                 | ne              |
| GLY | 2165   | 10562     | 8397       | 17   | n/a           |                 | ne              |
| VAL | 1938   | 10699     | 8761       | 18   | n/a           |                 | e               |
| ALA | 3668   | 15291     | 11623      | 19   | n/a           |                 | ne              |
| GLN | 2390   | 26909     | 24519      | 20   | n/a           |                 | ne              |

**Table S2B** Fasting state ranked by essentiality (ce and e considered essential) and then by difference

| AA  | Needed | Available | Difference | Rank | Actual Effect | Supplementation | AA Essentiality |
|-----|--------|-----------|------------|------|---------------|-----------------|-----------------|
| MET | 1148   | 1148      | 0          | 1    | 1             |                 | e               |
| ILE | 2191   | 2847      | 656        | 2    | 2             |                 | e               |
| PHE | 1363   | 2617      | 1254       | 3    | 5             |                 | e               |
| ARG | 2133   | 3674      | 1541       | 4    | 4             |                 | ce              |
| LEU | 3909   | 5648      | 1739       | 5    | 3             |                 | e               |
| TRP | 227    | 2020      | 1793       | 6    | n/a           |                 | e               |
| HIS | 735    | 3765      | 3030       | 7    | n/a           |                 | ce              |

|     |      |       |       |    |     |    |
|-----|------|-------|-------|----|-----|----|
| THR | 2174 | 6429  | 4255  | 8  | 7   | e  |
| LYS | 4132 | 8633  | 4501  | 9  | 6   | e  |
| VAL | 1938 | 10699 | 8761  | 10 | n/a | e  |
| GLU | 4996 | 1102  | -3894 | 11 | n/a | ne |
| ASP | 2162 | 138   | -2024 | 12 | n/a | ne |
| ASN | 1592 | 1883  | 291   | 13 | n/a | ne |
| TYR | 798  | 2709  | 1911  | 14 | n/a | ne |
| CYS | 472  | 2388  | 1916  | 15 | n/a | ne |
| SER | 2118 | 5235  | 3117  | 16 | n/a | ne |
| PRO | 1308 | 7715  | 6407  | 17 | n/a | ne |
| GLY | 2165 | 10562 | 8397  | 18 | n/a | ne |
| ALA | 3668 | 15291 | 11623 | 19 | n/a | ne |
| GLN | 2390 | 26909 | 24519 | 20 | n/a | ne |

**Table S2C** Postabsorptive state ranked by difference

| AA  | Needed | Available | Difference | Rank | Actual Supplementation Effect | AA Essentiality |
|-----|--------|-----------|------------|------|-------------------------------|-----------------|
| GLU | 4996   | 918       | -4078      | 1    | n/a                           | ne              |
| ASP | 2162   | 115       | -2047      | 2    | n/a                           | ne              |
| MET | 1148   | 957       | -191       | 3    | 1                             | e               |
| ASN | 1592   | 1569      | -23        | 4    | n/a                           | ne              |
| ILE | 2191   | 2373      | 182        | 5    | 4                             | e               |
| LEU | 3909   | 4707      | 798        | 6    | 5                             | e               |
| PHE | 1363   | 2181      | 818        | 7    | 2                             | e               |
| ARG | 2133   | 3061      | 928        | 8    | 3                             | ce              |
| TRP | 227    | 1684      | 1457       | 9    | n/a                           | e               |
| TYR | 798    | 2258      | 1460       | 10   | n/a                           | ne              |
| CYS | 472    | 1990      | 1518       | 11   | n/a                           | ne              |
| SER | 2118   | 4362      | 2244       | 12   | n/a                           | ne              |
| HIS | 735    | 3138      | 2403       | 13   | n/a                           | ce              |
| LYS | 4132   | 7194      | 3062       | 14   | 6                             | e               |
| THR | 2174   | 5357      | 3183       | 15   | 7                             | e               |
| PRO | 1308   | 6429      | 5121       | 16   | n/a                           | ne              |
| GLY | 2165   | 8801      | 6636       | 17   | n/a                           | ne              |
| VAL | 1938   | 8916      | 6978       | 18   | n/a                           | e               |
| ALA | 3668   | 12743     | 9075       | 19   | n/a                           | ne              |
| GLN | 2390   | 22425     | 20035      | 20   | n/a                           | ne              |

**Table S2D** Postabsorptive state ranked by essentiality (ce and e considered essential) and then by difference

| AA  | Needed | Available | Difference | Rank | Actual<br>Effect | Supplementation | AA<br>Essentiality |
|-----|--------|-----------|------------|------|------------------|-----------------|--------------------|
| MET | 1148   | 957       | -191       | 1    | 1                |                 | e                  |
| ILE | 2191   | 2373      | 182        | 2    | 4                |                 | e                  |
| LEU | 3909   | 4707      | 798        | 3    | 5                |                 | e                  |
| PHE | 1363   | 2181      | 818        | 4    | 2                |                 | e                  |
| ARG | 2133   | 3061      | 928        | 5    | 3                |                 | ce                 |
| TRP | 227    | 1684      | 1457       | 6    | n/a              |                 | e                  |
| HIS | 735    | 3138      | 2403       | 7    | n/a              |                 | ce                 |
| LYS | 4132   | 7194      | 3062       | 8    | 6                |                 | e                  |
| THR | 2174   | 5357      | 3183       | 9    | 7                |                 | e                  |
| VAL | 1938   | 8916      | 6978       | 10   | n/a              |                 | e                  |
| GLU | 4996   | 918       | -4078      | 11   | n/a              |                 | ne                 |
| ASP | 2162   | 115       | -2047      | 12   | n/a              |                 | ne                 |
| ASN | 1592   | 1569      | -23        | 13   | n/a              |                 | ne                 |
| TYR | 798    | 2258      | 1460       | 14   | n/a              |                 | ne                 |
| CYS | 472    | 1990      | 1518       | 15   | n/a              |                 | ne                 |
| SER | 2118   | 4362      | 2244       | 16   | n/a              |                 | ne                 |
| PRO | 1308   | 6429      | 5121       | 17   | n/a              |                 | ne                 |
| GLY | 2165   | 8801      | 6636       | 18   | n/a              |                 | ne                 |
| ALA | 3668   | 12743     | 9075       | 19   | n/a              |                 | ne                 |
| GLN | 2390   | 22425     | 20035      | 20   | n/a              |                 | ne                 |
